# Supplementary material
Source: PubMed Central journal article supplement (PMC8154203)

# SUPPORTING INFORMATION

## Multifunctional Neomycin-Triazine-Based Cationic Lipids for Gene Delivery with Antibacterial Properties

Chiara Pennetta<sup>†,#</sup>, Nina Bono<sup>†,#</sup>, Federica Ponti<sup>†,°</sup>, Maria Cristina Bellucci<sup>§</sup>, Fiorenza Viani<sup>¥</sup>, Gabriele Candiani<sup>†,\*</sup>, Alessandro Volonterio<sup>¥,†,\*</sup>

<sup>†</sup>Department of Chemistry, Materials, and Chemical Engineer “G. Natta”, Politecnico di Milano, Via Mancinelli 7, 20131 Milan, Italy;

<sup>°</sup> Laboratory for Biomaterials and Bioengineering, Canada Research Chair I in Biomaterials and Bioengineering for the Innovation in Surgery, Department of Min-Met-Materials Engineering & Research Center of CHU de Quebec, Division of Regenerative Medicine, Laval University, Quebec City, QC G1V 0A6, Canada

<sup>§</sup>Department of Food, Environmental and Nutritional Sciences, Università degli Studi di Milano, Via Celoria 2, 20133 Milan, Italy;

<sup>¥</sup>Consiglio Nazionale delle Ricerche, Istituto di Scienze e Tecnologie Chimiche “G. Natta” (SCITEC), Via Mario Bianco 9, 20131 Milan, Italy

## **AUTHOR INFORMATION**

### **Corresponding Authors**

\*E-mail: [gabriele.candiani@polimi.it](mailto:gabriele.candiani@polimi.it) (G.C.); [alessandro.volonterio@polimi.it](mailto:alessandro.volonterio@polimi.it) (A.V.). Phone: +39-02-23993139. Fax: +39-02-23993180.

### **Author contribution**

#These authors equally contributed to this work.

## Table of contents

|                                                                                                                                                                                                                                                                                                                                                                           |    |
|---------------------------------------------------------------------------------------------------------------------------------------------------------------------------------------------------------------------------------------------------------------------------------------------------------------------------------------------------------------------------|----|
| Figure S1. <sup>1</sup> H NMR, <sup>13</sup> C NMR and mass spectra of N-(2-(2-(2-azidoethoxy)ethoxy)ethyl)-4,6-dichloro-1,3,5-triazin-2-amine 3 .....                                                                                                                                                                                                                    | 5  |
| Figure S2. <sup>1</sup> H NMR, <sup>13</sup> C NMR and mass spectra of N2-(2-(2-(2-azidoethoxy)ethoxy)ethyl)-6-chloro-N4-octadecyl-1,3,5-triazine-2,4-diamine 5a .....                                                                                                                                                                                                    | 7  |
| Figure S3. <sup>1</sup> H NMR, <sup>13</sup> C NMR and mass spectra of (Z)-N2-(2-(2-(2-azidoethoxy)ethoxy)ethyl)-6-chloro-N4-(octadec-9-en-1-yl)-1,3,5-triazine-2,4-diamine, 5b .....                                                                                                                                                                                     | 9  |
| Figure S4. <sup>1</sup> H NMR, <sup>13</sup> C NMR, and mass spectra of (3S,8S,9S,10R,13R,14S,17R)-10,13-dimethyl-17-((R)-6-methylheptan-2-yl)-2,3,4,7,8,9,10,11,12,13,14,15,16,17-tetradecahydro-1H-cyclopenta[a]phenanthren-3-yl (4-((4-((2-(2-(2-azidoethoxy)ethoxy)ethyl)amino)-6-chloro-1,3,5-triazin-2-yl)amino)butyl)carbamate 5c .....                            | 11 |
| Figure S5. <sup>1</sup> H NMR, <sup>13</sup> C NMR, and mass spectra of N2-(2-(2-(2-azidoethoxy)ethoxy)ethyl)-N4,N6-dioctadecyl-1,3,5-triazine-2,4,6-triamine, 6aa .....                                                                                                                                                                                                  | 14 |
| Figure S6. <sup>1</sup> H NMR, <sup>13</sup> C NMR, and mass spectra of N2-(2-(2-(2-azidoethoxy)ethoxy)ethyl)-N4,N6-di((Z)-octadec-9-en-1-yl)-1,3,5-triazine-2,4,6-triamine, 6bb .....                                                                                                                                                                                    | 16 |
| Figure S7. <sup>1</sup> H NMR, <sup>13</sup> C NMR and mass spectra of bis((3S,8S,9S,10R,13R,14S,17R)-10,13-dimethyl-17-((R)-6-methylheptan-2-yl)-2,3,4,7,8,9,10,11,12,13,14,15,16,17-tetradecahydro-1H-cyclopenta[a]phenanthren-3-yl) (((6-((2-(2-(2-azidoethoxy)ethoxy)ethyl)amino)-1,3,5-triazine-2,4-diyl)bis(azanediyl))bis(butane-4,1-diyl))dicarbamate, 6cc .....  | 18 |
| Figure S8. <sup>1</sup> H NMR, <sup>13</sup> C NMR, and mass spectra of (Z)-N2-(2-(2-(2-azidoethoxy)ethoxy)ethyl)-N4-(octadec-9-en-1-yl)-N6-octadecyl-1,3,5-triazine-2,4,6-triamine, 6ab .....                                                                                                                                                                            | 21 |
| Figure S9. <sup>1</sup> H NMR, <sup>13</sup> C NMR, and mass spectra of (3S,8S,9S,10R,13R,14S,17R)-10,13-dimethyl-17-((R)-6-methylheptan-2-yl)-2,3,4,7,8,9,10,11,12,13,14,15,16,17-tetradecahydro-1H-cyclopenta[a]phenanthren-3-yl (4-((4-((2-(2-(2-azidoethoxy)ethoxy)ethyl)amino)-6-(octadecylamino)-1,3,5-triazin-2-yl)amino)butyl)carbamate, 6ac .....                | 23 |
| Figure S10. <sup>1</sup> H NMR, <sup>13</sup> C NMR, and mass spectra of (3S,8S,9S,10R,13R,14S,17R)-10,13-dimethyl-17-((R)-6-methylheptan-2-yl)-2,3,4,7,8,9,10,11,12,13,14,15,16,17-tetradecahydro-1H-cyclopenta[a]phenanthren-3-yl (4-((4-((2-(2-(2-azidoethoxy)ethoxy)ethyl)amino)-6-(((Z)-octadec-9-en-1-yl)amino)-1,3,5-triazin-2-yl)amino)butyl)carbamate, 6bc ..... | 26 |
| Figure S11. <sup>1</sup> H NMR and mass spectra of compound Boc-8a and <sup>1</sup> H NMR and <sup>13</sup> C NMR derivative 1_ST (compound 8a) .....                                                                                                                                                                                                                     | 29 |
| Figure S12. <sup>1</sup> H NMR and mass spectra of compound Boc-8b and <sup>1</sup> H NMR and <sup>13</sup> C NMR derivative 1_OL (compound 8b) .....                                                                                                                                                                                                                     | 32 |
| Figure S13. <sup>1</sup> H NMR and mass spectra of compound Boc-8c and <sup>1</sup> H NMR and <sup>13</sup> C NMR spectra of derivative 1_Chol (compound 8c) .....                                                                                                                                                                                                        | 35 |
| Figure S14. <sup>1</sup> H NMR and mass spectra of compound Boc-9aa and <sup>1</sup> H NMR and <sup>13</sup> C NMR spectra of derivative 2_ST (compound 9aa) .....                                                                                                                                                                                                        | 38 |
| Figure S15. <sup>1</sup> H NMR and mass spectra of compound Boc-9bb and <sup>1</sup> H NMR and <sup>13</sup> C NMR spectra of derivative 2_OL (compound 9bb) .....                                                                                                                                                                                                        | 41 |
| Figure S16. <sup>1</sup> H NMR and <sup>13</sup> C NMR spectra of derivative 2_Chol (compound 9cc) .....                                                                                                                                                                                                                                                                  | 44 |
| Figure S17. <sup>1</sup> H NMR and mass spectra of compound Boc-9ab and <sup>1</sup> H NMR and <sup>13</sup> C NMR spectra of derivative 1_ST-1_OL (compound 9ab) .....                                                                                                                                                                                                   | 46 |
| Figure S18. <sup>1</sup> H NMR and mass spectra of compound Boc-9bc and <sup>1</sup> H NMR and <sup>13</sup> C NMR spectra of derivative 1_OL-1_Chol (compound 9bc) .....                                                                                                                                                                                                 | 49 |

|                                                                                                                                                                      |           |
|----------------------------------------------------------------------------------------------------------------------------------------------------------------------|-----------|
| <b>Figure S19. <sup>1</sup>H NMR and mass spectra of Boc-9ac and <sup>1</sup>H NMR and <sup>13</sup>C NMR spectra of derivative 1_ST-1_Chol (compound 9ac) .....</b> | <b>52</b> |
| <b>Figure S20. <sup>19</sup>F spectra of derivative 1_OL (compound 8b) .....</b>                                                                                     | <b>55</b> |
| <b>Figure S21. <sup>19</sup>F titration spectra of derivative 2_OL (compound 9bb) .....</b>                                                                          | <b>56</b> |
| <b>Figure S22. Cytotoxicity and transfection efficiency of Neo-triazine derivatives evaluated on HeLa cells.....</b>                                                 | <b>57</b> |
| <b>Figure S23. MIC of Neomycin.</b>                                                                                                                                  | <b>58</b> |

**Figure S1. <sup>1</sup>H NMR, <sup>13</sup>C NMR and mass spectra of N-(2-(2-(2-azidoethoxy)ethoxy)ethyl)-4,6-dichloro-1,3,5-triazin-2-amine 3**

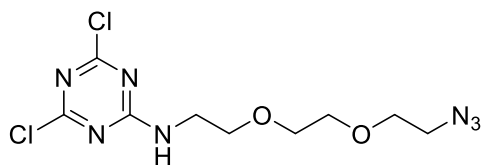

**N-(2-(2-(2-azidoethoxy)ethoxy)ethyl)-4,6-dichloro-1,3,5-triazin-2-amine 3:**  $R_f = 0.22$  (Hexane/AcOEt = 30:70); <sup>1</sup>H NMR (400 MHz, CDCl<sub>3</sub>)  $\delta$  6.55 (br s, 1H), 3.61-3.58 (m, 10H), 3.37 (t,  $J = 4.8$  Hz, 2H); <sup>13</sup>C NMR (101 MHz, CDCl<sub>3</sub>)  $\delta$  170.8, 169.9, 165.8, 70.6, 70.5, 70.1, 69.0, 50.6, 41.3. ESI  $m/z$  344.0 [M+Na, (100)]<sup>+</sup>; Anal. calcd. for C<sub>9</sub>H<sub>13</sub>Cl<sub>2</sub>N<sub>7</sub>O<sub>2</sub>: C 33.56, H 4.07, N 30.44; found: C 33.55, H 4.06, N 30.44.

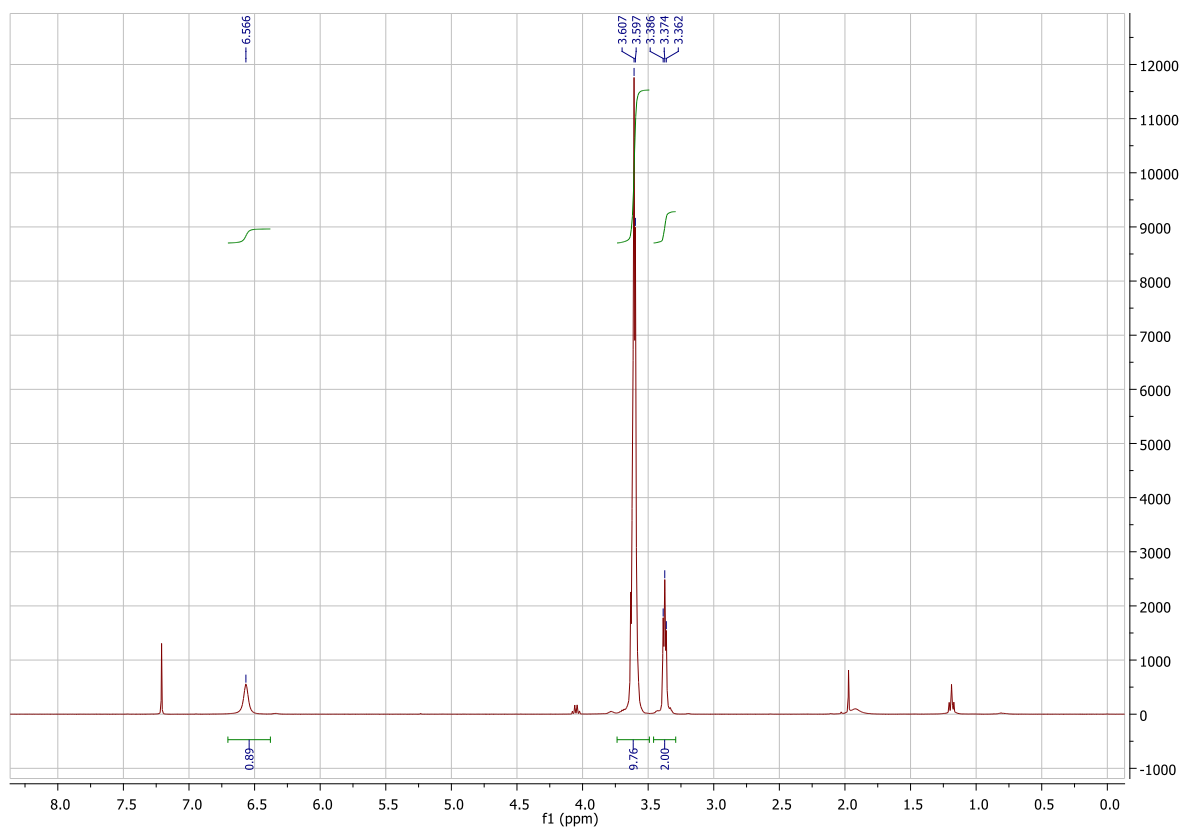

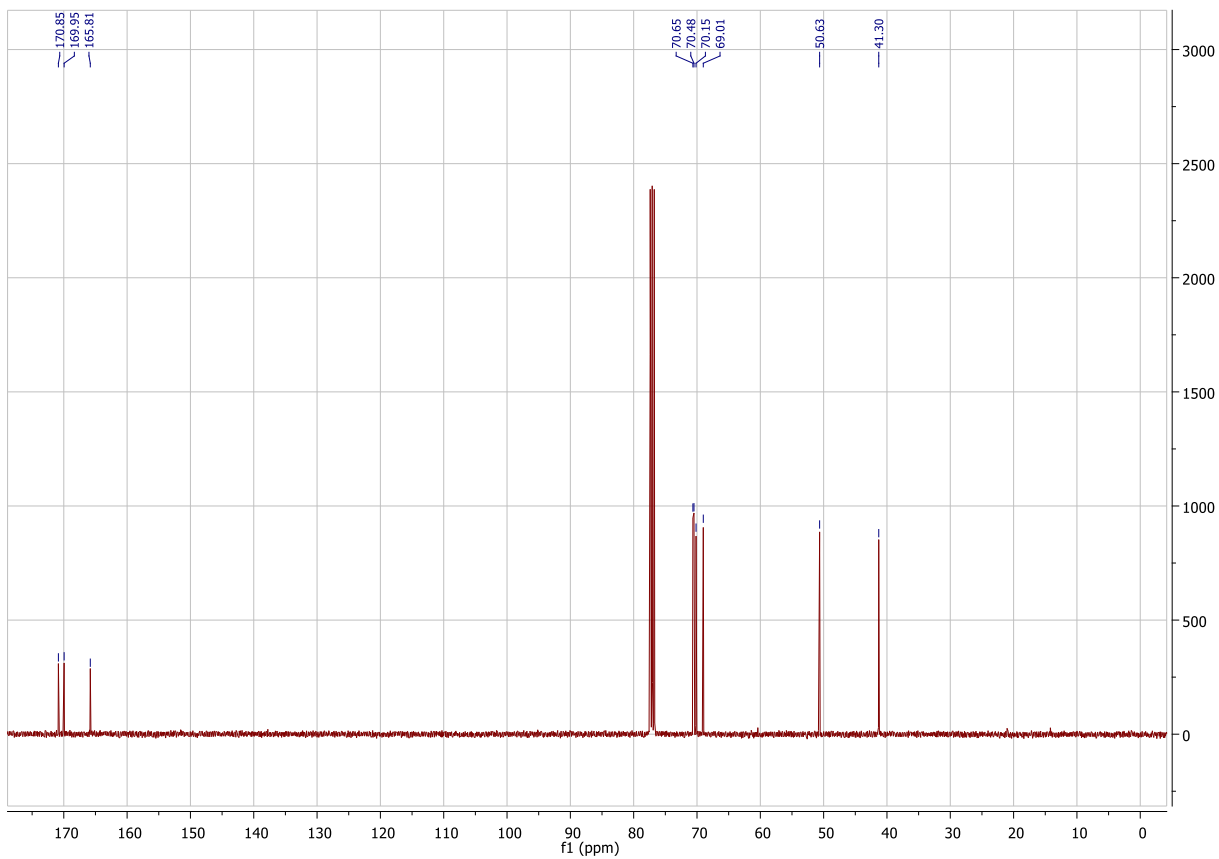

**-L.G.S. - Laboratorio Grandi Strumenti - Display Report**

Analysis Name av cpv66.d  
 Sample Name  
 Comment 1 mg/ml dil 1:100 MeOH  
 Richiedente: Pennetta

Acquisition Date 11/04/16 16:45:15  
 Method Copy of \_01tmix\_posneg  
 Im.MS

Operator Walter Panzeri  
 Instrument esquire3000plus

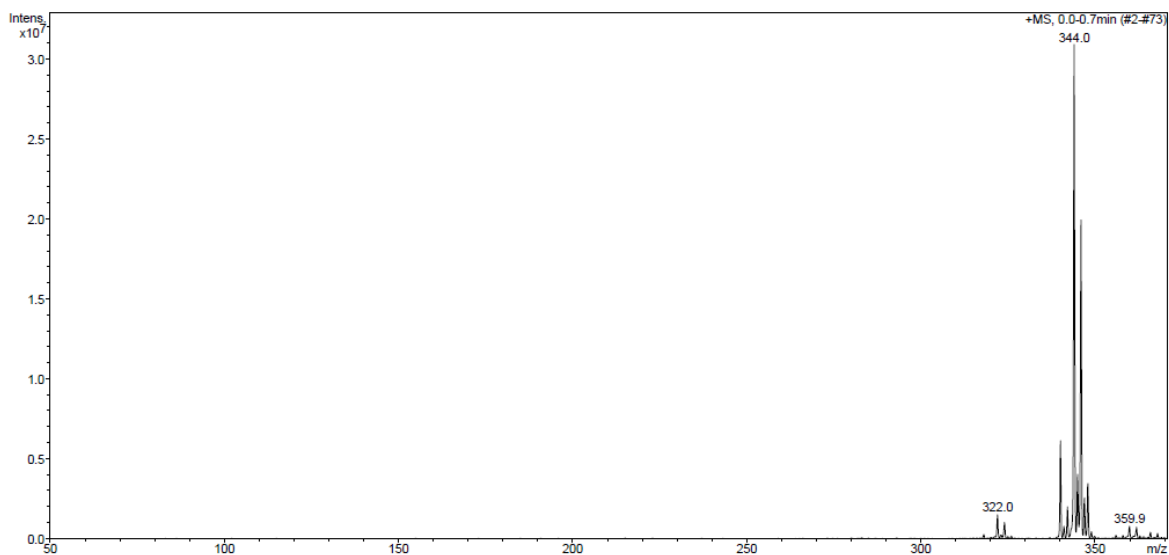

**Figure S2.  $^1\text{H}$  NMR,  $^{13}\text{C}$  NMR and mass spectra of N2-(2-(2-(2-azidoethoxy)ethoxy)ethyl)-6-chloro-N4-octadecyl-1,3,5-triazine-2,4-diamine 5a**

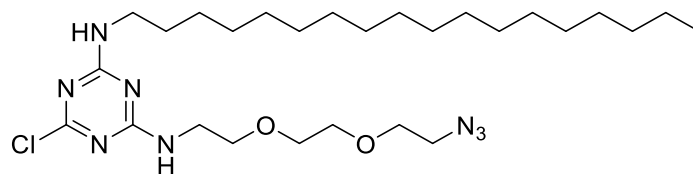

**N2-(2-(2-(2-azidoethoxy)ethoxy)ethyl)-6-chloro-N4-octadecyl-1,3,5-triazine-2,4-diamine 5a:** white solid, 70% yield.  $R_f = 0.31$  (Hexane/AcOEt = 60:40);  $^1\text{H}$  NMR (400 MHz,  $\text{CDCl}_3$ )  $\delta$  5.86 (br s, 1H), 5.52 (br s, 1H), 3.67-3.62 (m, 10H), 3.45-3.39 (m, 4H), 1.55-1.53 (m, 2H), 1.28-1.25 (m, 30H), 0.88 (t,  $J = 7.6$  Hz, 3H);  $^{13}\text{C}$  NMR (101 MHz,  $\text{CDCl}_3$ )  $\delta$  70.8, 70.7, 70.3, 50.8, 41.1, 40.9, 32.1, 29.8, 29.8, 29.7, 29.5, 29.4, 26.9, 22.8, 14.2, the aromatic carbons did not appear due to low intensity; ESI ( $m/z$ ) 577,3 [ $\text{M}+\text{Na}^+$  (100)] $^+$ ; Anal. calcd. for  $\text{C}_{27}\text{H}_{51}\text{ClN}_8\text{O}_2$ : C 58.41, H 9.26, N 20.18; found: C 58.42, H 9.27, N 20.20.

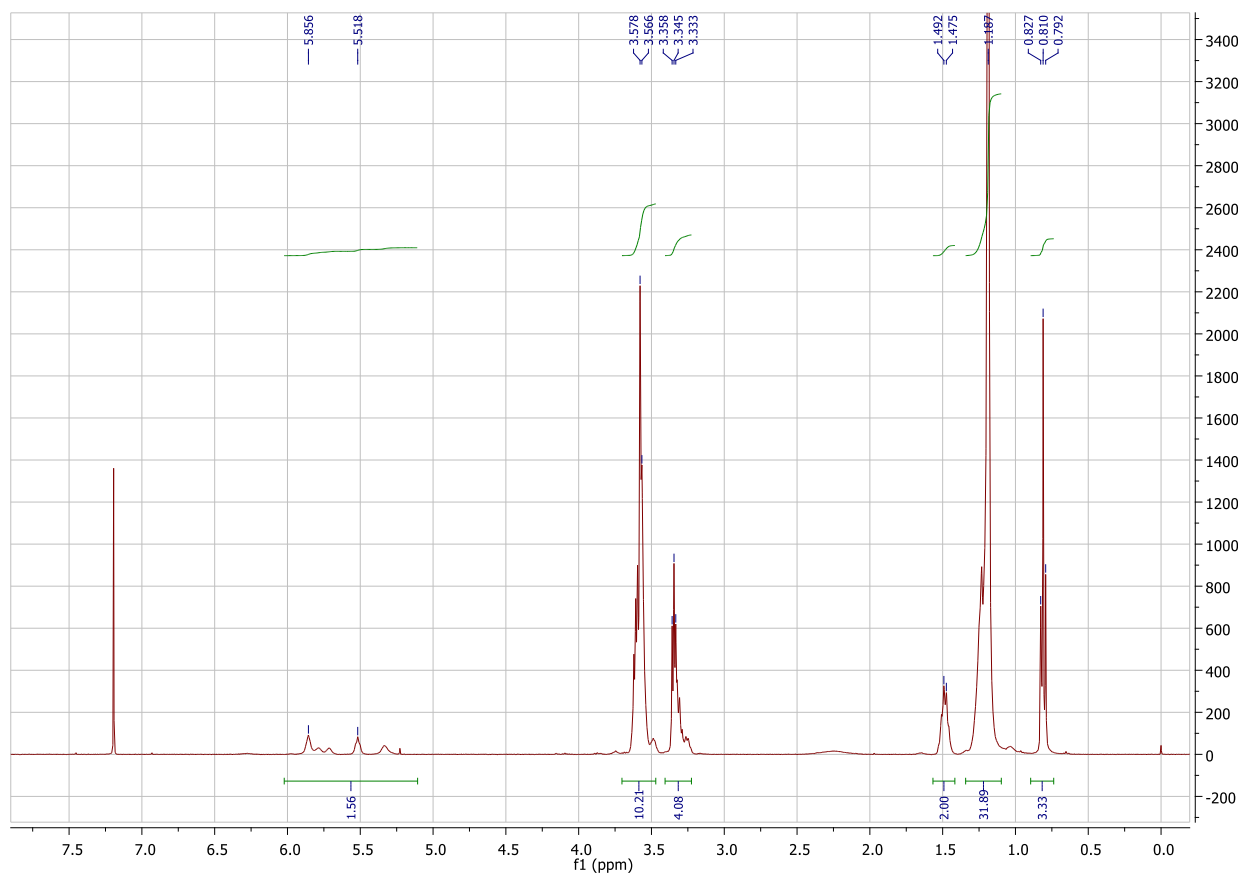

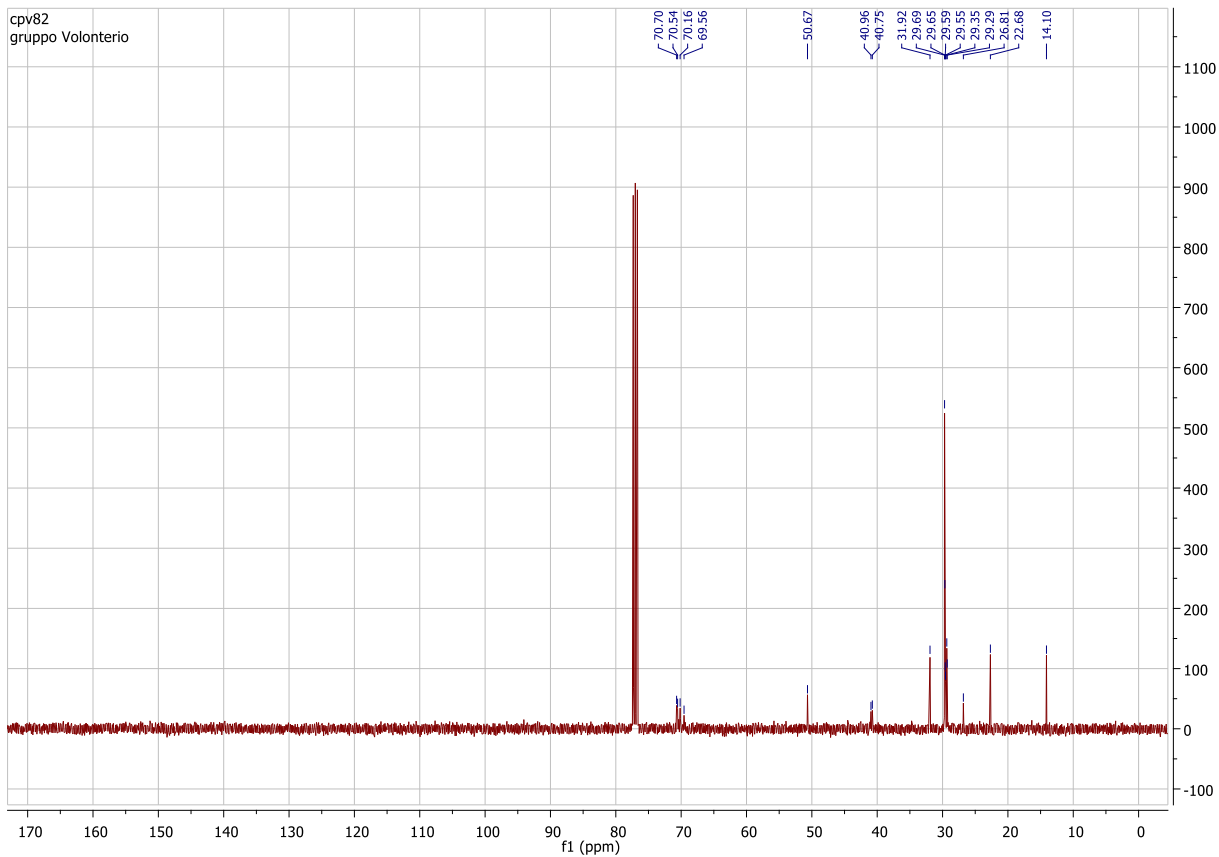

-L.G.S. - Laboratorio Grandi Strumenti - Display Report

|               |                                                   |                  |                        |            |                 |
|---------------|---------------------------------------------------|------------------|------------------------|------------|-----------------|
| Analysis Name | av cpv82.d                                        | Acquisition Date | 02/21/17 08:11:56      | Operator   | Walter Panzeri  |
| Sample Name   |                                                   | Method           | Copy of _01tmix_posneg | Instrument | esquire3000plus |
| Comment       | 1 mg/mL dil 1:100 MeOH<br>Richiedente: Volonterio |                  | Im.MS                  |            |                 |

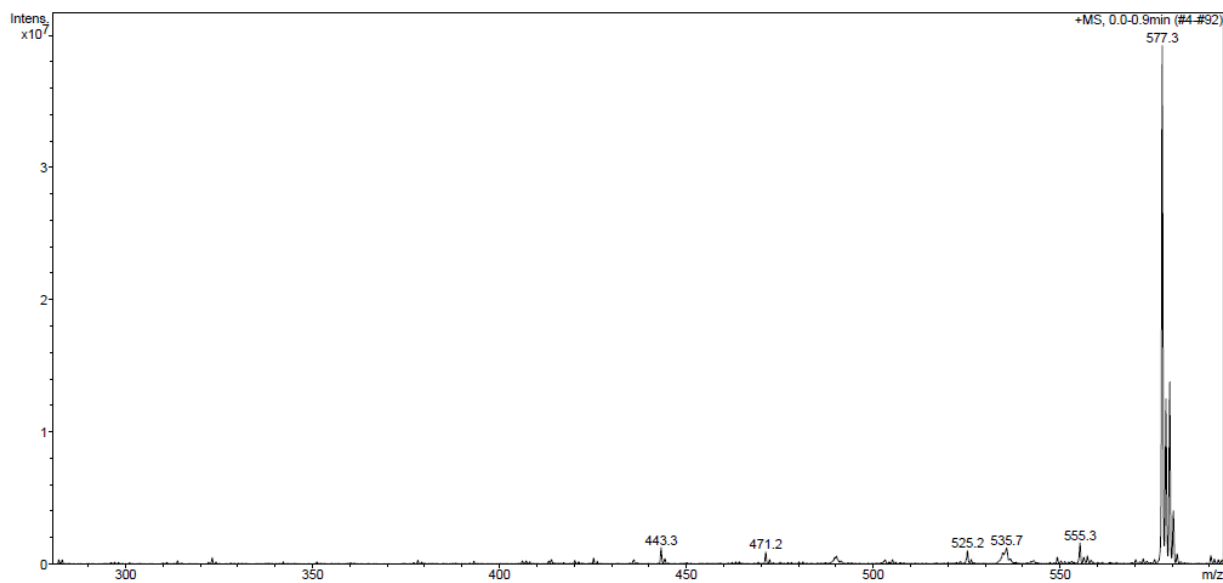



**Figure S3.  $^1\text{H}$  NMR,  $^{13}\text{C}$  NMR and mass spectra of (Z)-N2-(2-(2-(2-azidoethoxy)ethoxy)ethyl)-6-chloro-N4-(octadec-9-en-1-yl)-1,3,5-triazine-2,4-diamine, **5b****

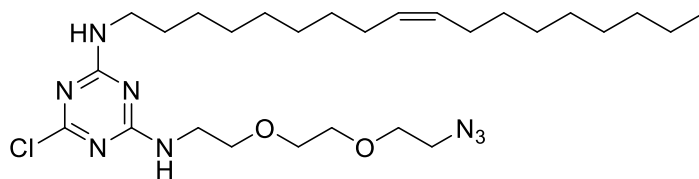

**(Z)-N2-(2-(2-(2-azidoethoxy)ethoxy)ethyl)-6-chloro-N4-(octadec-9-en-1-yl)-1,3,5-triazine-2,4-diamine, **5b****: white solid in 70% yield.  $R_f = 0.58$  (Hexane/AcOEt = 60:40);  $^1\text{H}$  NMR (400 MHz,  $\text{CDCl}_3$ )  $\delta$  5.89 (br s, 1H), 5.53 (br s, 1H), 5.35-5.33 (m, 2H), 3.69-3.63 (m, 10H), 3.43-3.41 (m, 4H), 2.05-1.98 (m, 4H), 1.58-1.53 (m, 2H), 1.35-1.26 (m, 22H), 0.88 (t,  $J = 7,4$  Hz, 3H).  $^{13}\text{C}$  NMR (101 MHz,  $\text{CDCl}_3$ )  $\delta$  168.2, 165.7, 165.6, 130.1, 129.9, 70.8, 70.7, 70.3, 69.7, 50.8, 41.1, 40.8, 32.7, 32.0, 29.8, 29.6, 29.4, 27.3, 26.9, 22.8, 14.2. ESI (m/z) 575,3  $[\text{M}+\text{Na}, (100)]^+$ ; Anal. calcd. for  $\text{C}_{27}\text{H}_{49}\text{ClN}_8\text{O}_2$ : C 58.62, H 8.93, N 20.26; found: C 58.60, H 8.93, N 20.27.

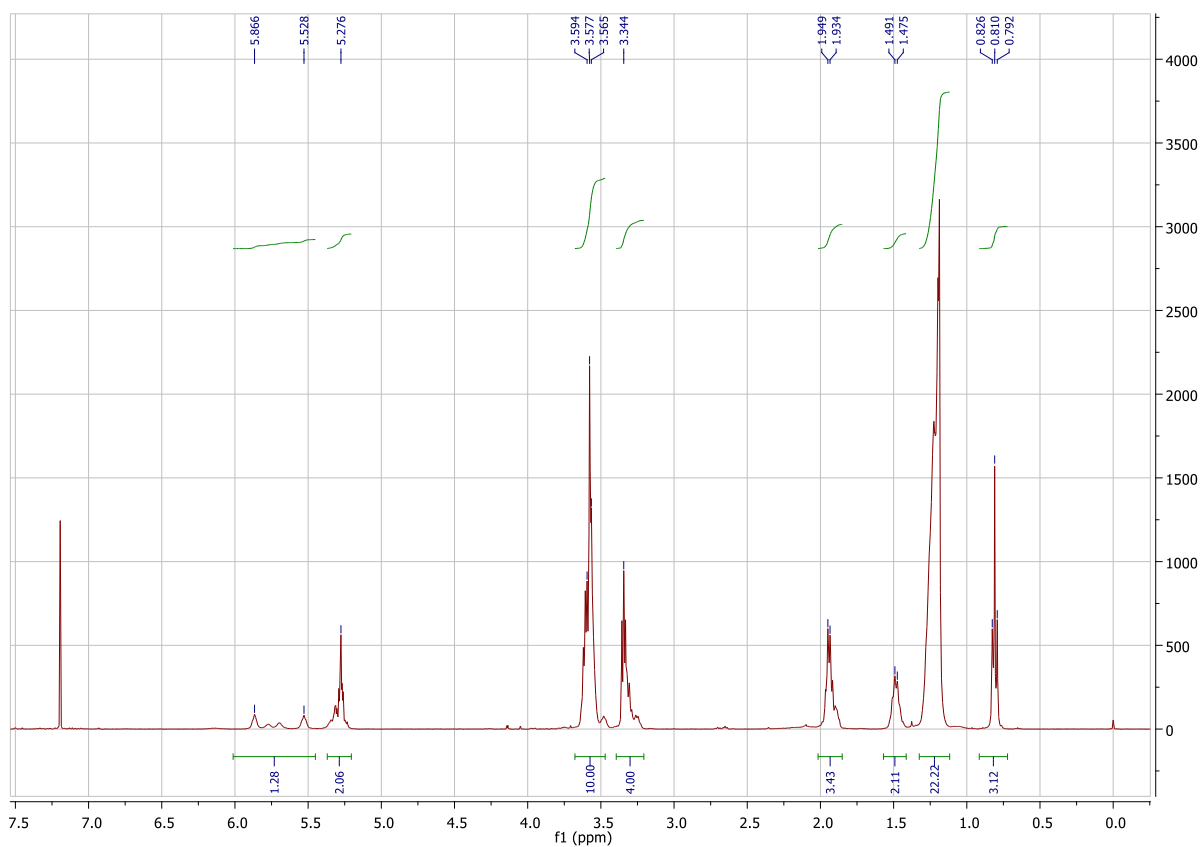

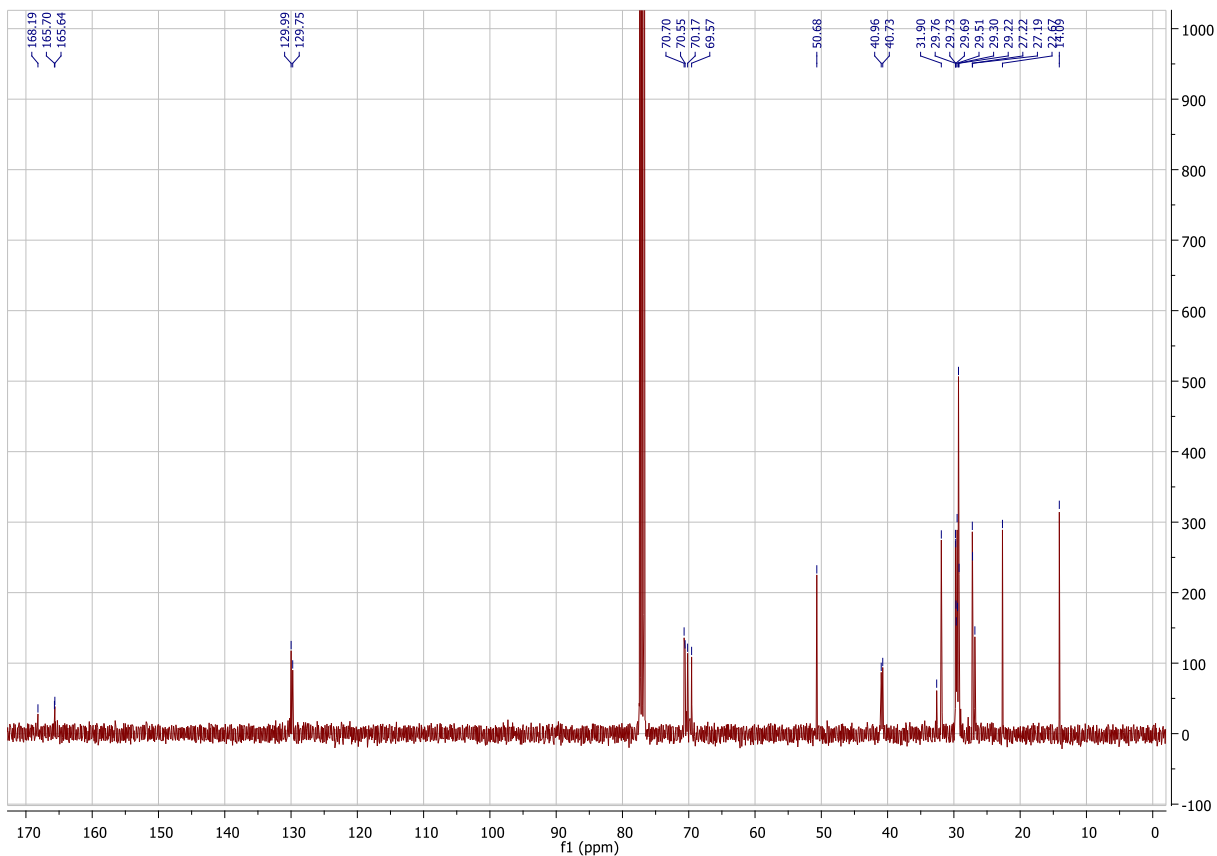

**-L.G.S. - Laboratorio Grandi Strumenti - Display Report**

|               |                                                 |                  |                        |            |                 |
|---------------|-------------------------------------------------|------------------|------------------------|------------|-----------------|
| Analysis Name | av cpv67.d                                      | Acquisition Date | 11/10/16 11:34:14      | Operator   | Walter Panzeri  |
| Sample Name   |                                                 | Method           | Copy of _01tmix_posneg | Instrument | esquire3000plus |
| Comment       | 1 mg/MI dil 1:100 MeOH<br>Richiedente: Pennetta |                  | lm.MS                  |            |                 |

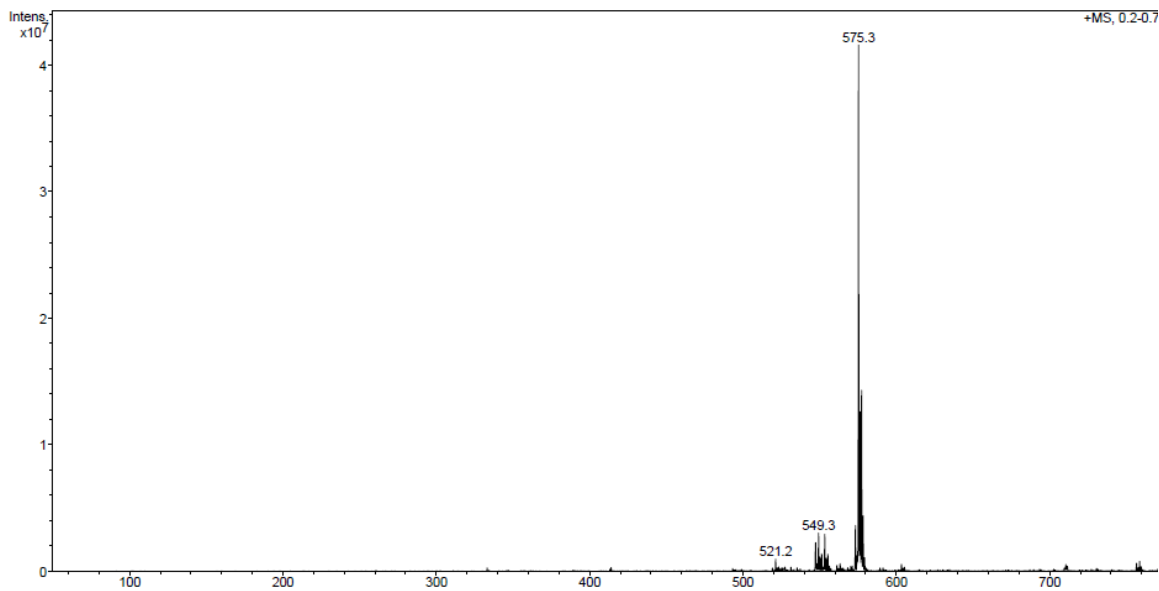

**Figure S4. <sup>1</sup>H NMR, <sup>13</sup>C NMR, and mass spectra of (3S,8S,9S,10R,13R,14S,17R)-10,13-dimethyl-17-((R)-6-methylheptan-2-yl)-2,3,4,7,8,9,10,11,12,13,14,15,16,17-tetradecahydro-1H-cyclopenta[a]phenanthren-3-yl (4-((4-((2-(2-azidoethoxy)ethoxy)ethyl)amino)-6-chloro-1,3,5-triazin-2-yl)amino)butyl)carbamate 5c**

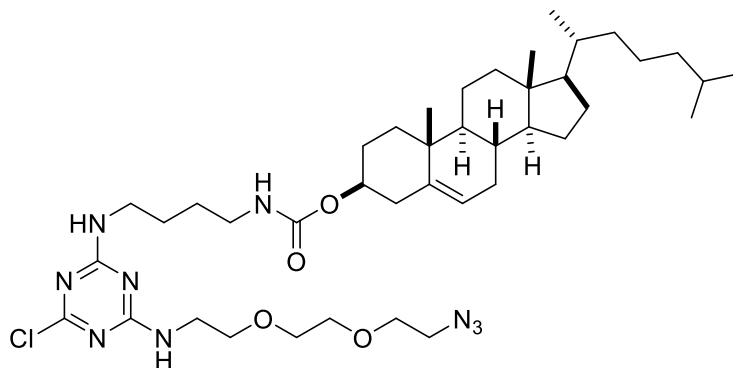

**(3S,8S,9S,10R,13R,14S,17R)-10,13-dimethyl-17-((R)-6-methylheptan-2-yl)-2,3,4,7,8,9,10,11,12,13,14,15,16,17-tetradecahydro-1H-cyclopenta[a]phenanthren-3-yl (4-((4-((2-(2-azidoethoxy)ethoxy)ethyl)amino)-6-chloro-1,3,5-triazin-2-yl)amino)butyl)carbamate 5c:** white solid, 70% yield.  $R_f = 0.34$  (Hexane/AcOEt = 30:70); <sup>1</sup>H NMR (400 MHz, CDCl<sub>3</sub>) δ 6.29 (br s, 1H), 6.20 (br s, 1H), 5.30 (d,  $J = 4.8$  Hz, 1H), 4.41 (br s, 1H), 3.60-3.56 (m, 10H), 3.37-3.34 (m, 4H), 3.12 (br s, 2H), 2.32-2.28 (m, 2H), 1.94-1.92 (m, 2H), 1.80-1.77 (m, 3H), 1.66-0.83 (m, 38H), 0.66 (s, 3H); <sup>13</sup>C NMR (101 MHz, CDCl<sub>3</sub>) δ 156.4, 140.0, 129.9, 122.6, 74.4, 70.8, 70.6, 70.2, 69.9, 56.8, 56.3, 50.8, 50.2, 42.5, 39.9, 39.6, 36.7, 36.3, 35.9, 32.0, 28.4, 28.1, 24.4, 24.0, 22.9, 22.7, 21.2, 19.5, 18.8, 12.0, two aromatic carbons did not appear due to low intensity; ESI  $m/z$  808,7 [M+Na, (100)]<sup>+</sup>; Anal. calcd. for C<sub>41</sub>H<sub>68</sub>ClN<sub>9</sub>O<sub>4</sub>: C 62.61, H 8.72, N 16.03; found: C 62.60, H 8.74, N 16.01.

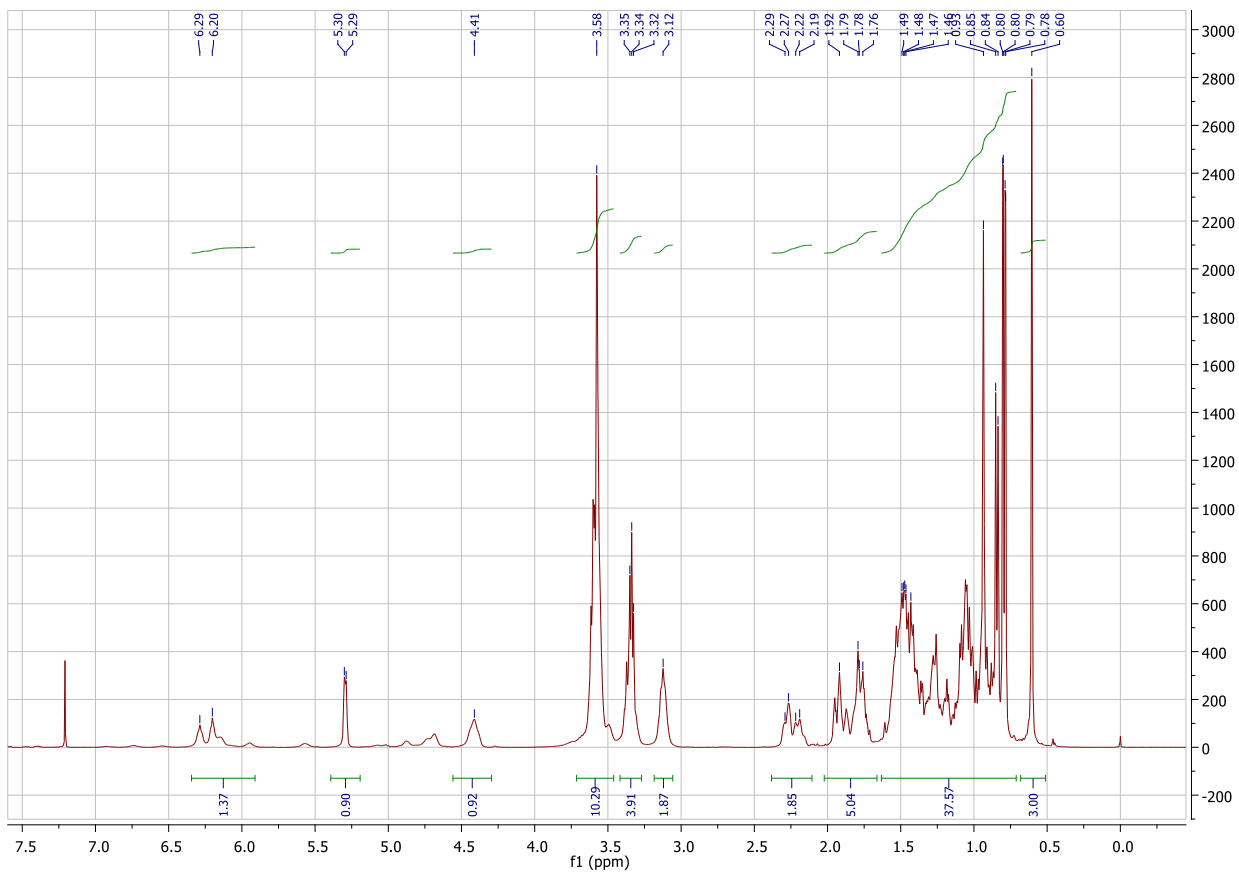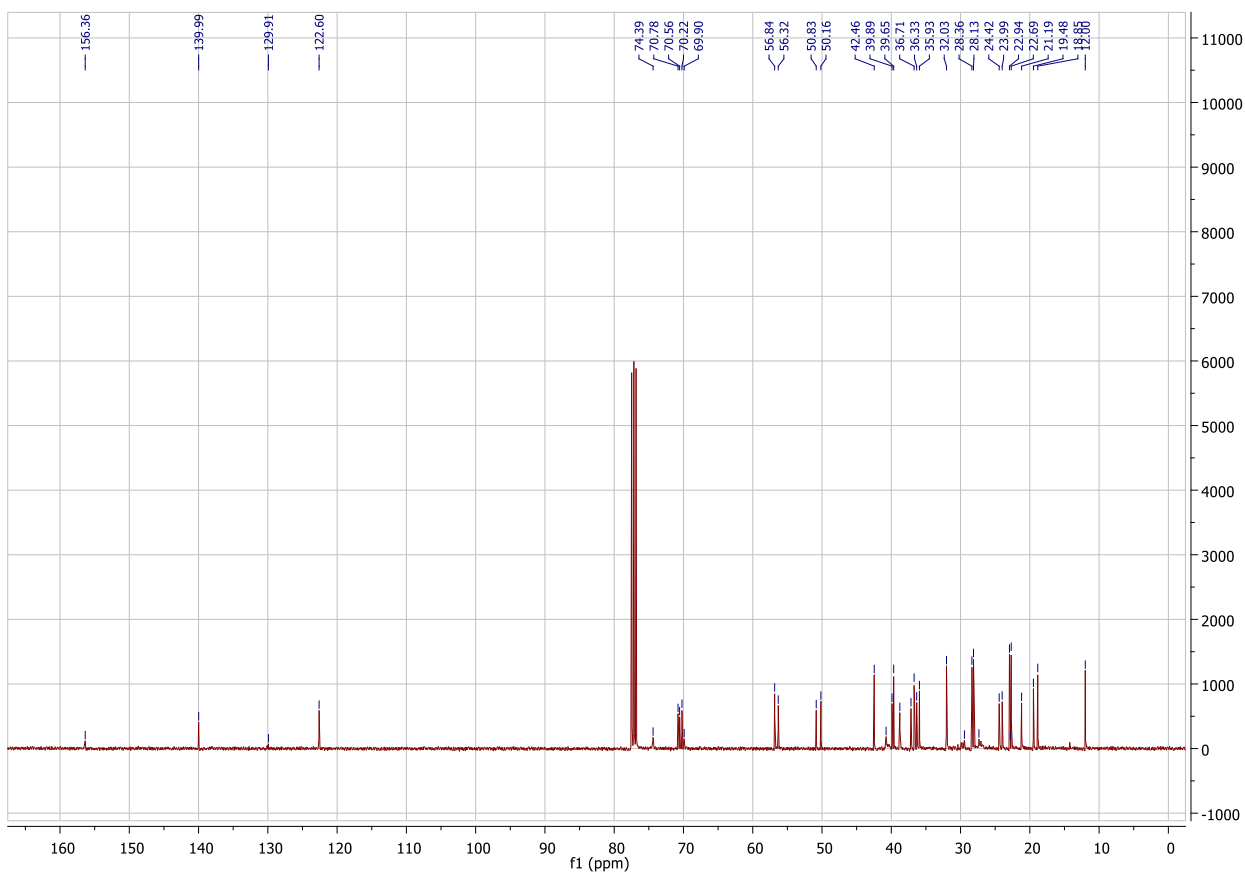

-L.G.S. - Laboratorio Grandi Strumenti - Display Report

Analysis Name av cp127d.d  
Sample Name  
Comment 1 mg/ml dil 1:100 MeOH  
Richiedente: Pennetta

Acquisition Date 09/19/18 13:56:23  
Method Copy of \_01tmix\_posneg  
Im.MS

Operator Walter Panzeri  
Instrument esquire3000plus

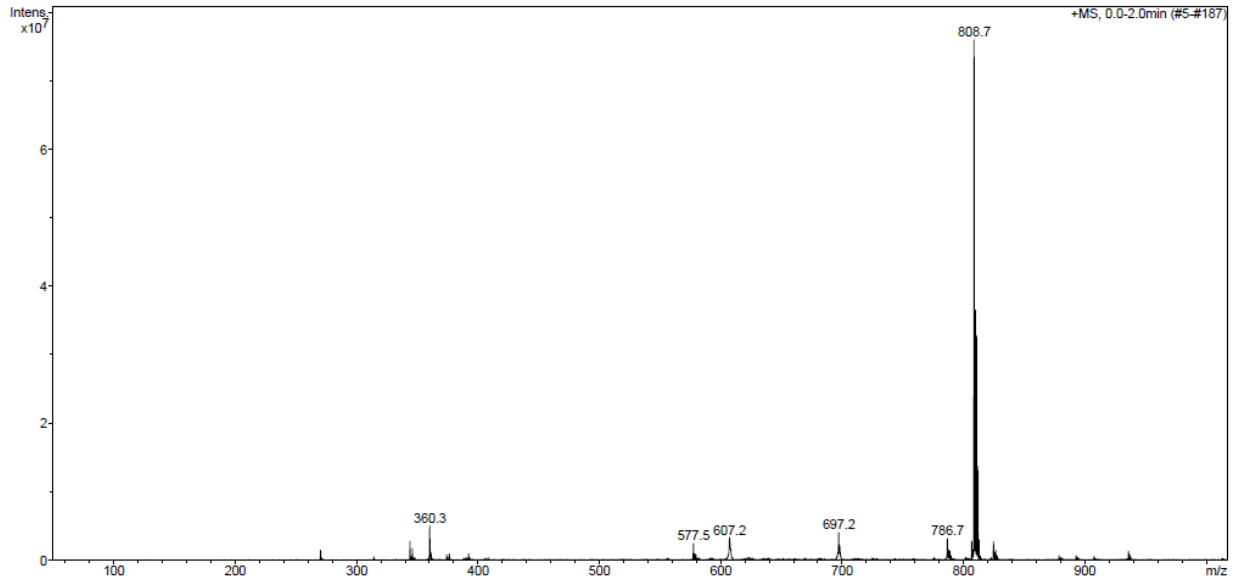

**Figure S5.  $^1\text{H}$  NMR,  $^{13}\text{C}$  NMR, and mass spectra of N2-(2-(2-(2-azidoethoxy)ethoxy)ethyl)-N4,N6-dioctadecyl-1,3,5-triazine-2,4,6-triamine, 6aa**

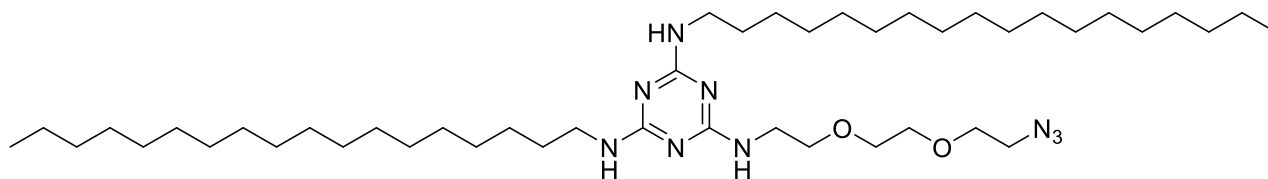

**N2-(2-(2-(2-azidoethoxy)ethoxy)ethyl)-N4,N6-dioctadecyl-1,3,5-triazine-2,4,6-triamine, 6aa:** yellowish solid, 60% yield.  $R_f = 0.47$  (DCM/MeOH = 90:10);  $^1\text{H}$  NMR (400 MHz,  $\text{CDCl}_3$ )  $\delta$  5.30 (br s, 1H), 4.92 (br s, 2H), 3.62-3.55 (m, 10H), 3.33 (t,  $J = 5.2$  Hz, 2H), 3.33-3.30 (m, 4H), 1.48-1.42 (m, 4H), 1.22-1.17 (m, 60H), 0.81 (t,  $J = 7.2$  Hz, 6H);  $^{13}\text{C}$  NMR (101 MHz,  $\text{CDCl}_3$ )  $\delta$  71.2, 71.6, 71.4, 71.2, 51.8, 41.9, 41.6, 33.7, 33.0, 30.9, 30.5, 30.4, 28.4, 28.3, 28.1, 23.8, 15.2, the aromatic carbons did not appear due to low intensity; ESI (m/z) 788,6  $[\text{M}+\text{H}, (100)]^+$ ; Anal. calcd. for  $\text{C}_{45}\text{H}_{89}\text{N}_9\text{O}_2$ : C 68.57, H 11.38, N 15.99; found: C 68.57, H 11.37, N 16.00.

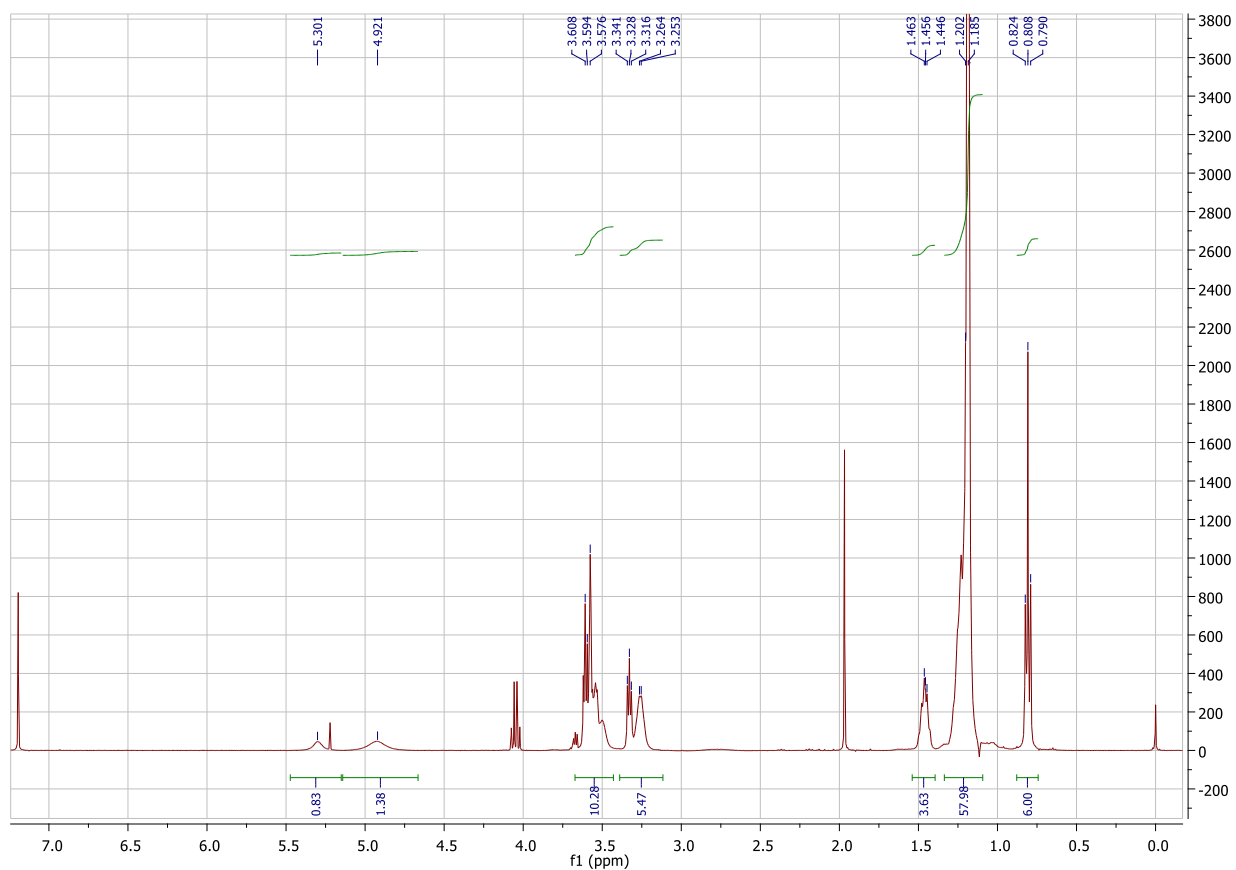

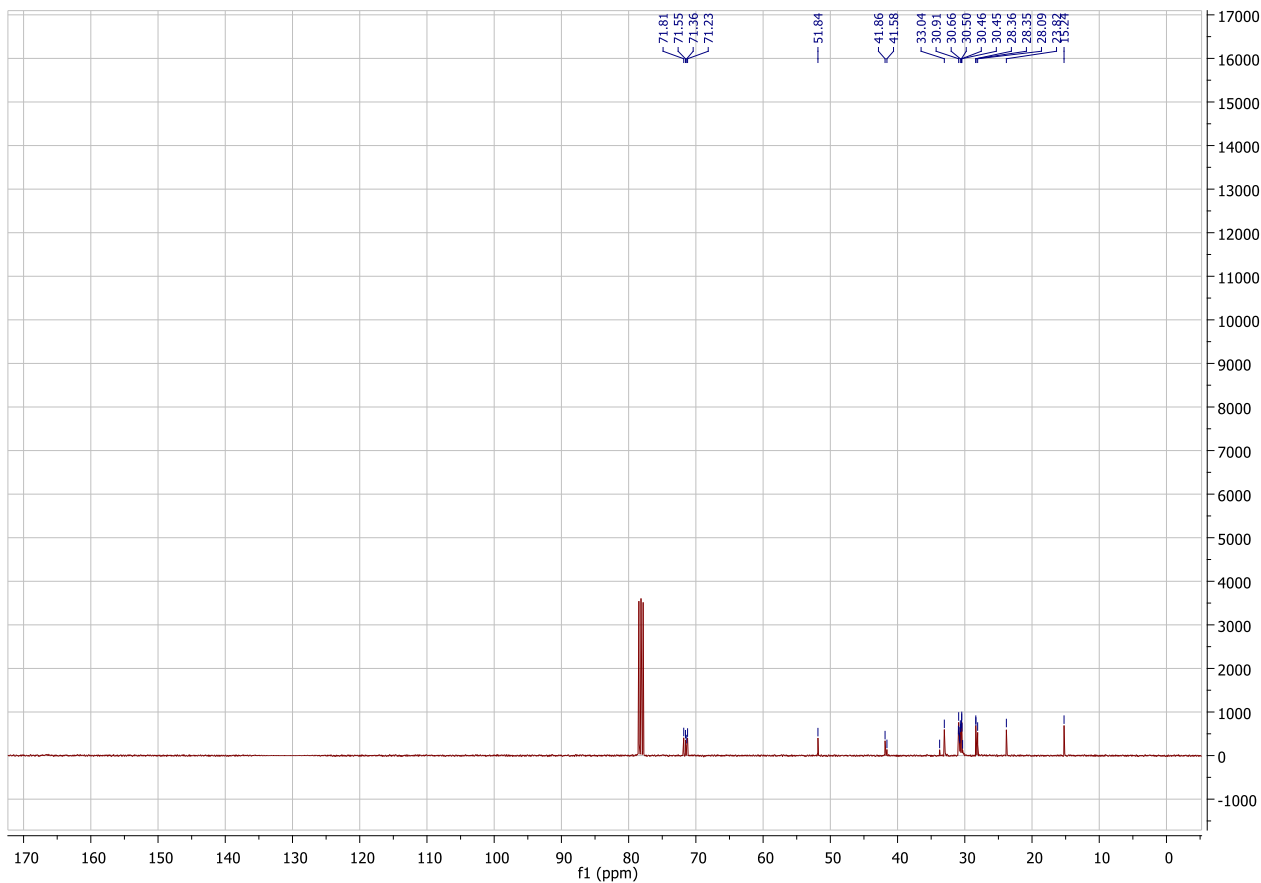

**-L.G.S. - Laboratorio Grandi Strumenti - Display Report**

|               |                                                 |                  |                        |            |                 |
|---------------|-------------------------------------------------|------------------|------------------------|------------|-----------------|
| Analysis Name | av cpv112b.d                                    | Acquisition Date | 09/08/17 15:39:18      | Operator   | Walter Panzeri  |
| Sample Name   |                                                 | Method           | Copy of _01tmix_posneg | Instrument | esquire3000plus |
| Comment       | 1 mg/ml dil 1:100 MeOH<br>Richiedente: Pennetta |                  | lm.MS                  |            |                 |

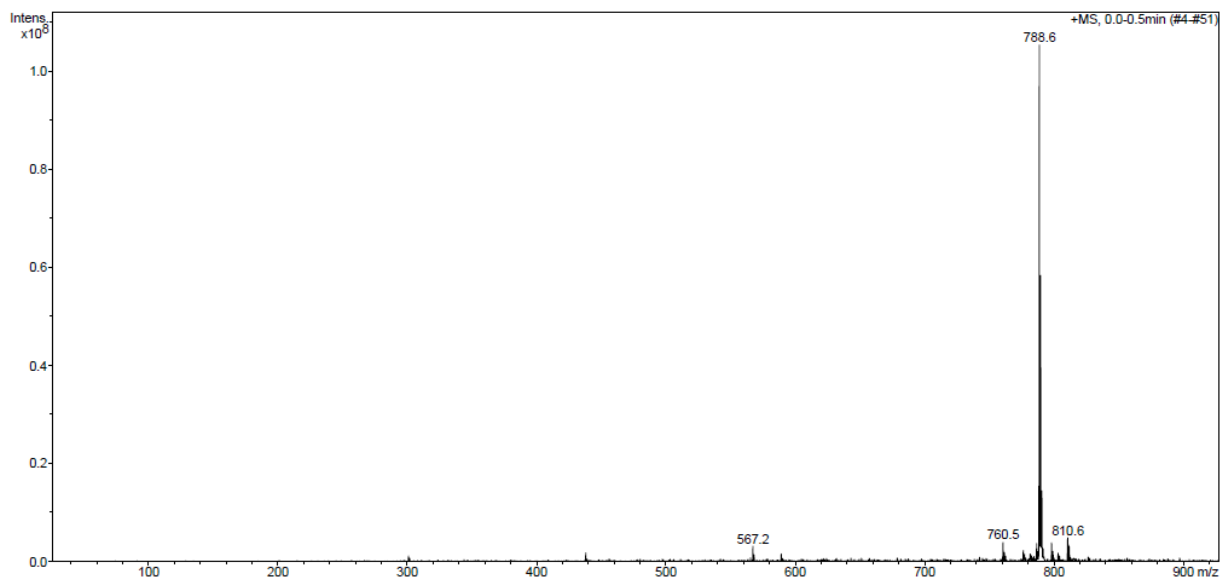

**Figure S6.  $^1\text{H}$  NMR,  $^{13}\text{C}$  NMR, and mass spectra of N2-(2-(2-(2-azidoethoxy)ethoxy)ethyl)-N4,N6-di((Z)-octadec-9-en-1-yl)-1,3,5-triazine-2,4,6-triamine, **6bb****

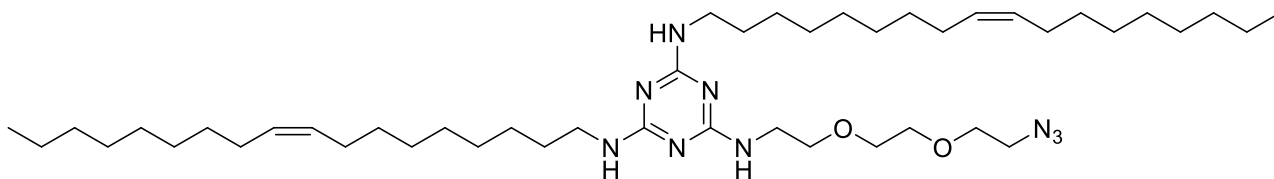

**N2-(2-(2-(2-azidoethoxy)ethoxy)ethyl)-N4,N6-di((Z)-octadec-9-en-1-yl)-1,3,5-triazine-2,4,6-triamine, **6bb****: white solid. 60% yield.  $R_f = 0.42$  (DCM/MeOH = 90:10);  $^1\text{H}$  NMR (400 MHz,  $\text{CDCl}_3$ )  $\delta$  5.36-5.33 (m, 4H), 4.87 (br s, 2H), 3.68-3.56 (m, 10H), 3.39 (t,  $J = 4.96$  Hz, 2H), 3.35-3.32 (m, 4H), 2.02-1.96 (m, 8H), 1.54-1.52 (m, 4H), 1.28-1.25 (m, 44H), 0.87 (t,  $J = 6.6$  Hz, 6H);  $^{13}\text{C}$  NMR (101 MHz,  $\text{CDCl}_3$ )  $\delta$  129.9, 129.8, 70.7, 70.4, 70.2, 70.1, 50.7, 40.7, 40.4, 31.9, 29.8, 29.5, 29.4, 29.36, 29.32, 29.31, 27.22, 27.21, 26.9, 22.7, 14.1, the aromatic carbons did not appear due to low intensity; ESI (m/z) 806.6  $[\text{M}+\text{Na}, (26)]^+$ , 784.6  $[\text{M}+\text{H}, (100)]^+$ ; Anal. calcd. for  $\text{C}_{45}\text{H}_{85}\text{N}_9\text{O}_2$ : C 68.92, H 10.93, N 16.07; found: C 68.93, H 10.95, N 16.06.

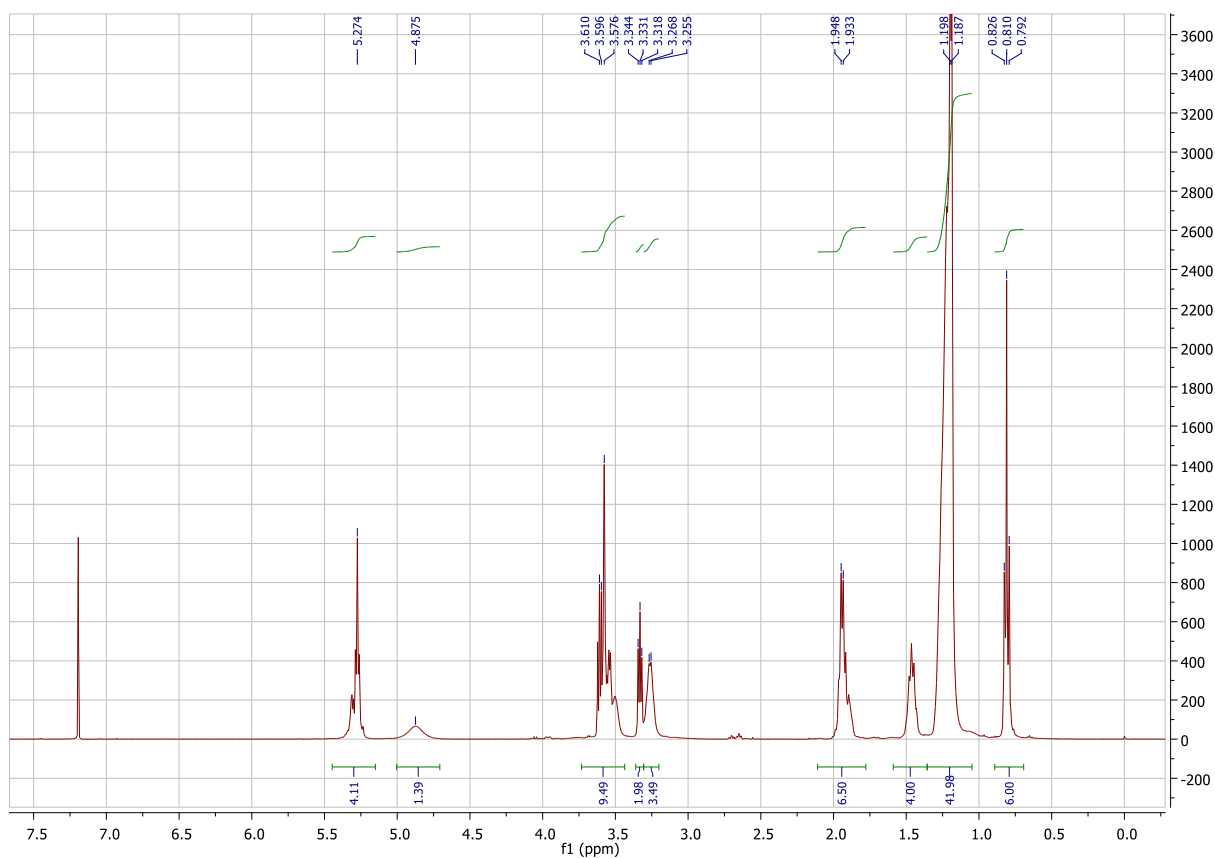



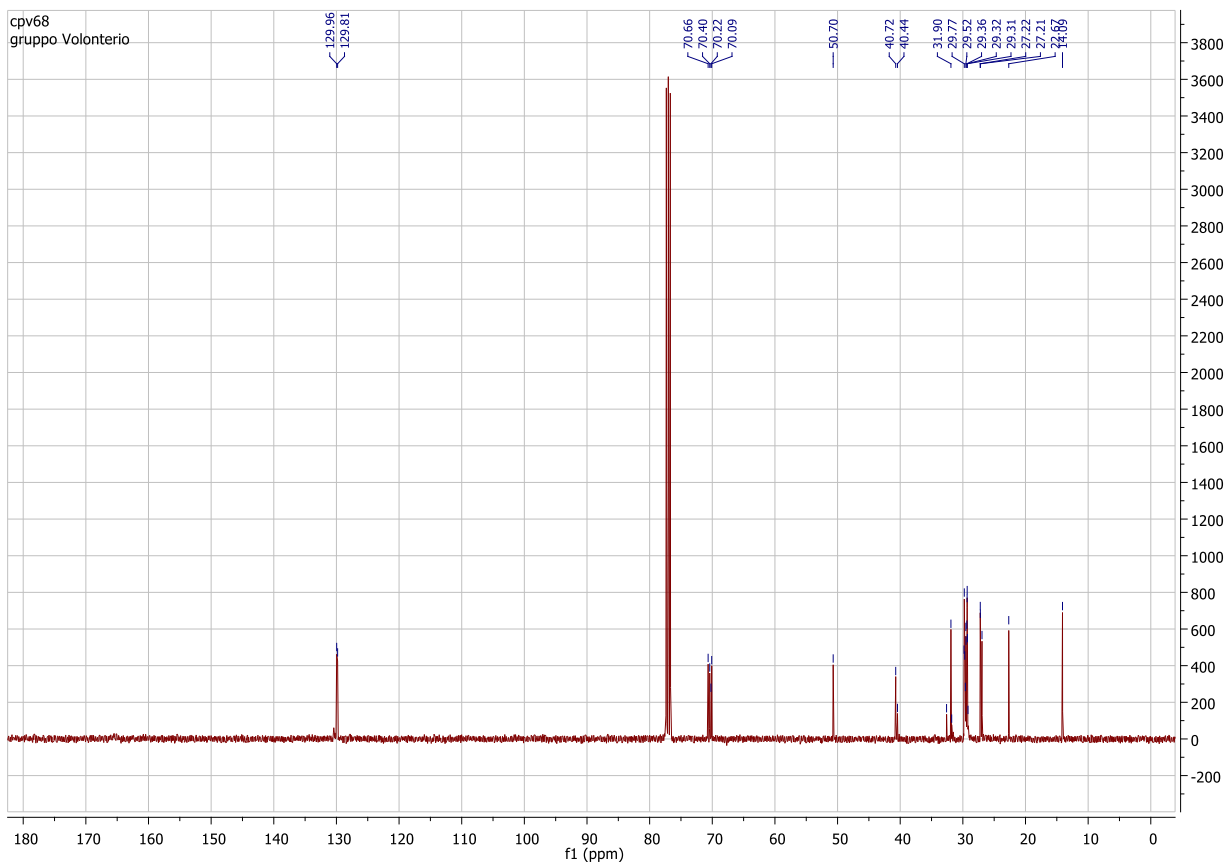

-L.G.S. - Laboratorio Grandi Strumenti - Display Report

Analysis Name av cpv68.d  
Sample Name  
Comment 1 mg/ml dil 1:100 MeOH  
Richiedente: Pennetta

Acquisition Date 11/17/16 13:54:22  
Method Copy of \_01tmix\_posneg  
Im.MS

Operator  
Instrument  
Administrator esquire3000plus

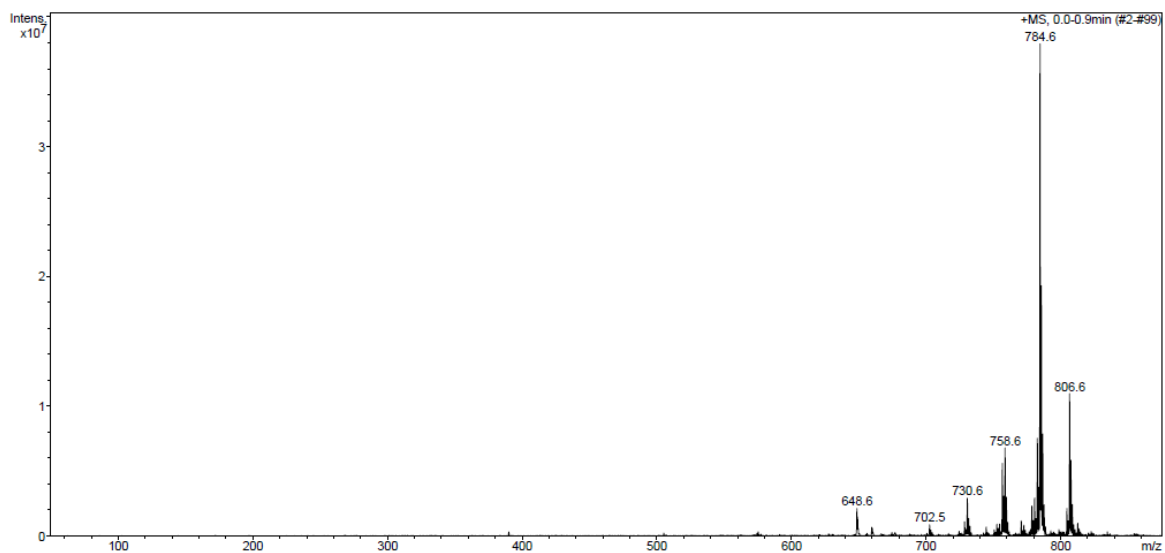

**Figure S7.**  $^1\text{H}$  NMR,  $^{13}\text{C}$  NMR and mass spectra of bis((3S,8S,9S,10R,13R,14S,17R)-10,13-dimethyl-17-((R)-6-methylheptan-2-yl)-2,3,4,7,8,9,10,11,12,13,14,15,16,17-tetradecahydro-1H-cyclopenta[a]phenanthren-3-yl) (((6-((2-(2-(2-azidoethoxy)ethoxy)ethyl)amino)-1,3,5-triazine-2,4-diyl)bis(azanediyl))bis(butane-4,1-diyl)dicarbamate, **6cc**

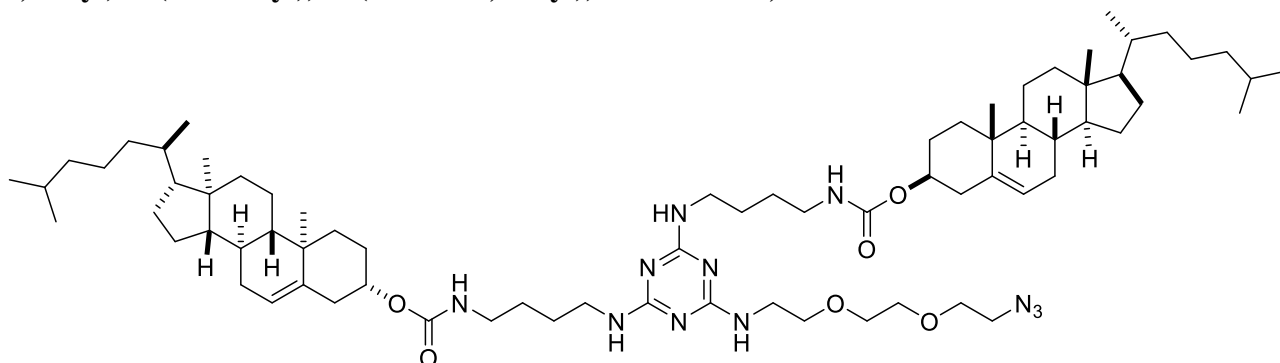

bis((3S,8S,9S,10R,13R,14S,17R)-10,13-dimethyl-17-((R)-6-methylheptan-2-yl)-2,3,4,7,8,9,10,11,12,13,14,15,16,17-tetradecahydro-1H-cyclopenta[a]phenanthren-3-yl) (((6-((2-(2-(2-azidoethoxy)ethoxy)ethyl)amino)-1,3,5-triazine-2,4-diyl)bis(azanediyl))bis(butane-4,1-diyl)dicarbamate, **6cc**: white solid, 45% yield.  $R_f = 0.39$  (DCM/MeOH = 90:10);  $^1\text{H}$  NMR (400 MHz,  $\text{CDCl}_3$ )  $\delta$  5.40-5.37 (m, 2H), 4.50 (br s, 2H), 3.71-3.67 (m, 10H), 3.43-3.40 (m, 6H), 3.23-3.20 (m, 4H), 2.38-2.27 (m, 4H), 2.10-1.74 (m, 10H), 1.60-0.87 (m, 76H), 0.69 (s, 6H);  $^{13}\text{C}$  NMR (101 MHz,  $\text{CDCl}_3$ )  $\delta$  156.2, 139.8, 122.5, 74.4, 70.8, 70.6, 70.2, 69.9, 56.8, 56.3, 50.8, 50.2, 42.5, 40.7, 39.9, 39.6, 38.8, 37.1, 36.1, 36.3, 35.9, 32.0, 29.9, 29.6, 29.4, 28.4, 28.1, 27.3, 24.4, 24.00, 22.9, 22.8, 22.7, 21.2, 19.5, 18.8, 14.2, 12.0, the aromatic carbons did not appear due to low intensity; ESI (m/z) 1273.0  $[\text{M}+\text{Na}, (100)]^+$ , 1251.0  $[\text{M}+\text{H}, (36)]^+$ ; Anal. calcd. for  $\text{C}_{73}\text{H}_{123}\text{N}_{11}\text{O}_6$ : C 70.10, H 9.91, N 12.32; found: C 70.09, H 9.93, N 12.31.

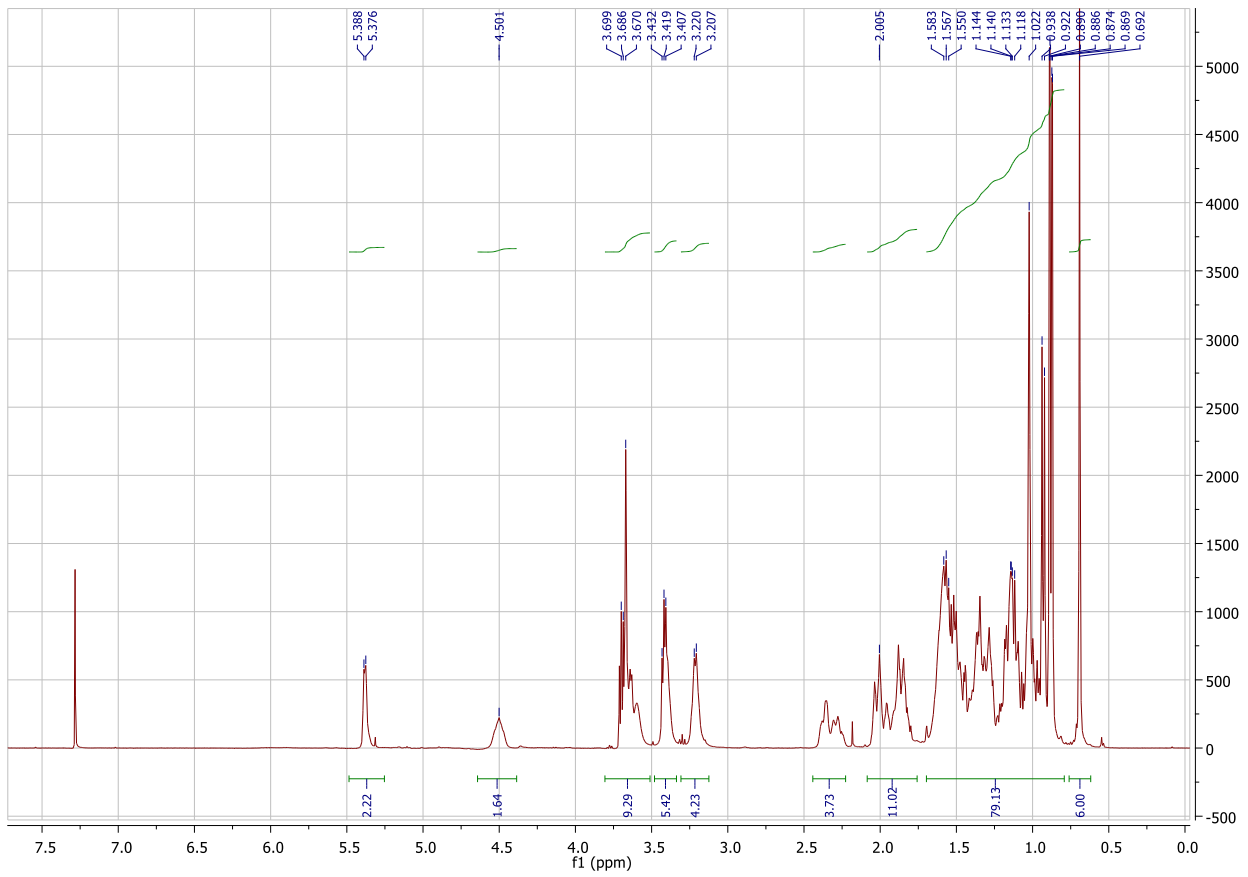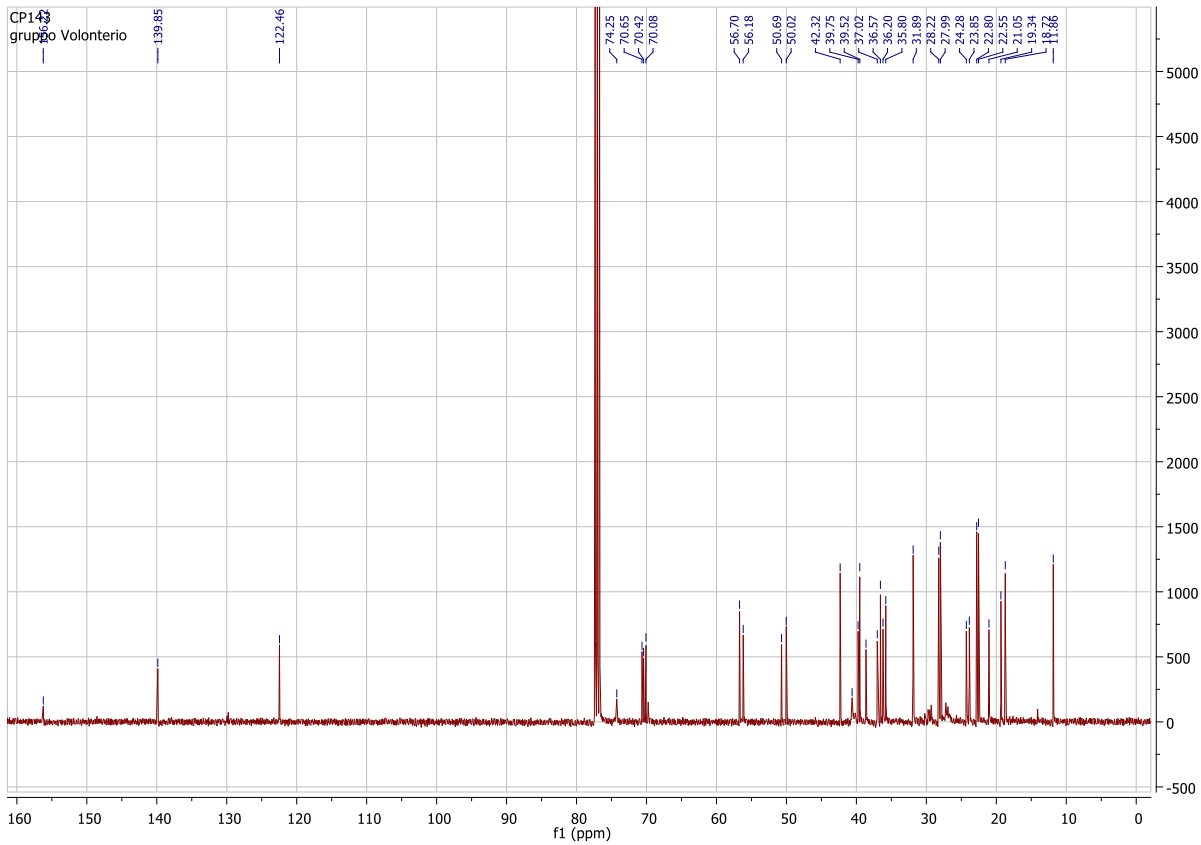

-L.G.S. - Laboratorio Grandi Strumenti - Display Report

|               |                        |                  |                    |            |                 |
|---------------|------------------------|------------------|--------------------|------------|-----------------|
| Analysis Name | av cp143a.d            | Acquisition Date | 11/30/18 09:56:16  | Operator   | Walter Panzeri  |
| Sample Name   | 1 mg/ml dil 1:100 MeOH | Method           | Copy of _giov 1620 | Instrument | esquire3000plus |
| Comment       | Richiedente: Pennetta  |                  | 24713.MS           |            |                 |

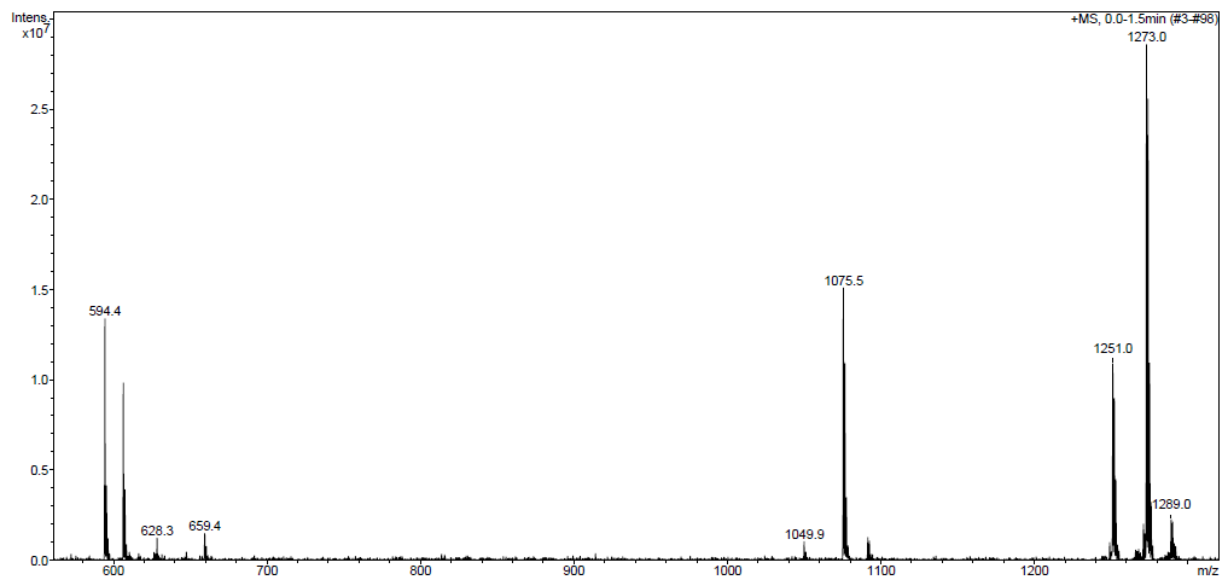

**Figure S8. <sup>1</sup>H NMR, <sup>13</sup>C NMR, and mass spectra of (Z)-N2-(2-(2-(2-azidoethoxy)ethoxy)ethyl)-N4-(octadec-9-en-1-yl)-N6-octadecyl-1,3,5-triazine-2,4,6-triamine, 6ab**

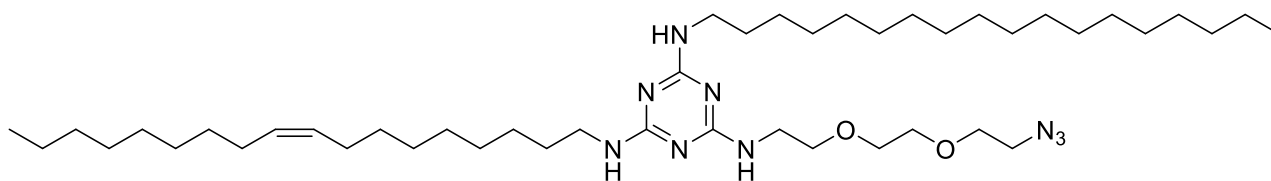

**(Z)-N2-(2-(2-(2-azidoethoxy)ethoxy)ethyl)-N4-(octadec-9-en-1-yl)-N6-octadecyl-1,3,5-triazine-2,4,6-triamine, 6ab:** white solid, 60% yield.  $R_f = 0.51$  (DCM/MeOH = 90:10); <sup>1</sup>H NMR (400 MHz, CDCl<sub>3</sub>) δ 5.31-5.26 (m, 2H), 3.64-3.54 (m, 10H), 3.39-3.31 (m, 6H), 1.96-1.92 (m, 4H), 1.50-1.43 (m, 4H), 1.28-1.14 (m, 52H), 0.81 (t,  $J = 7.2$  Hz, 6H). <sup>13</sup>C NMR (101 MHz, CDCl<sub>3</sub>) δ 130.0, 129.8, 70.8, 70.6, 70.2, 69.7, 50.8, 41.0, 32.7, 32.0, 29.8, 29.6, 29.6, 29.4, 27.3, 27.0, 22.8, the aromatic carbons did not appear due to low intensity; ESI (m/z) 809,0 [M+Na, (31)]<sup>+</sup>, 787,1 [M+H, (100)]<sup>+</sup>; Anal. calcd. for C<sub>45</sub>H<sub>87</sub>N<sub>9</sub>O<sub>2</sub>: C 68.74, H 11.15, N 16.03; found: C 68.72, H 11.15, N 16.02.

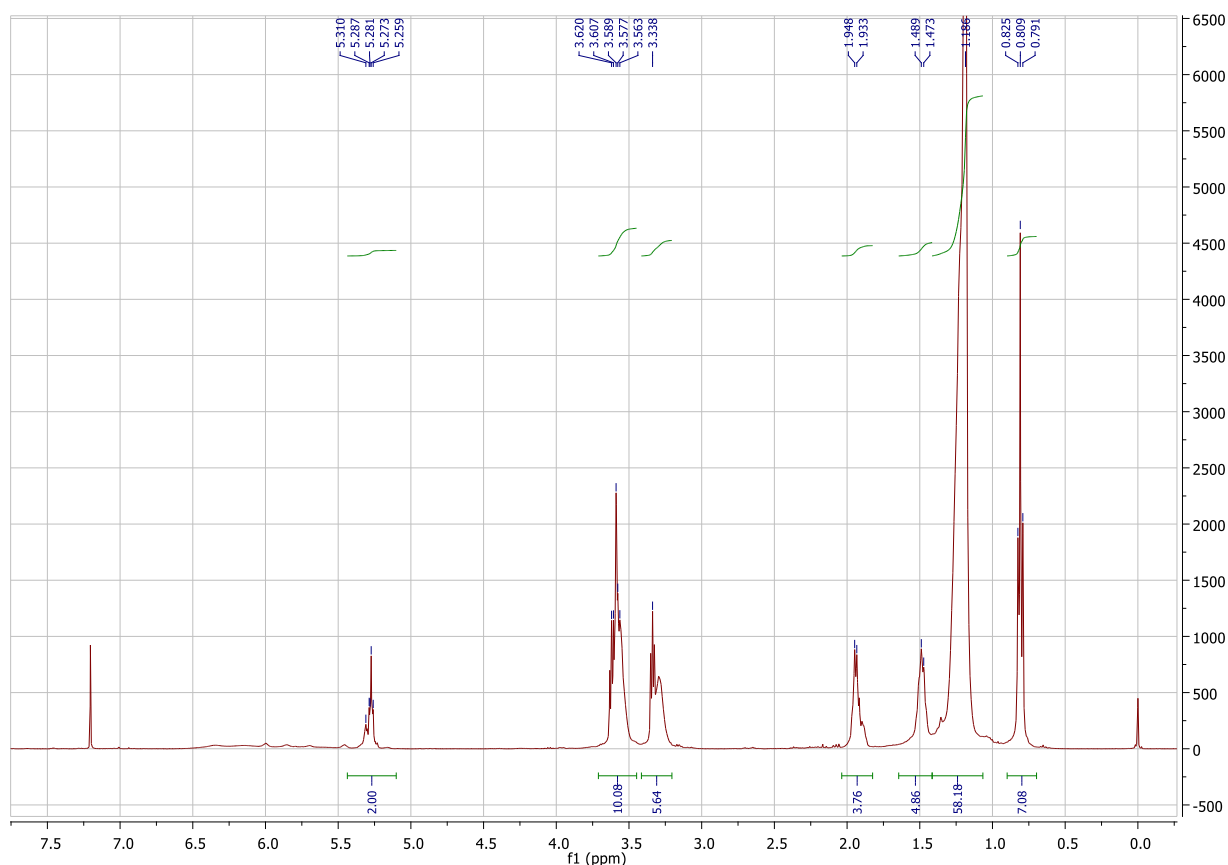

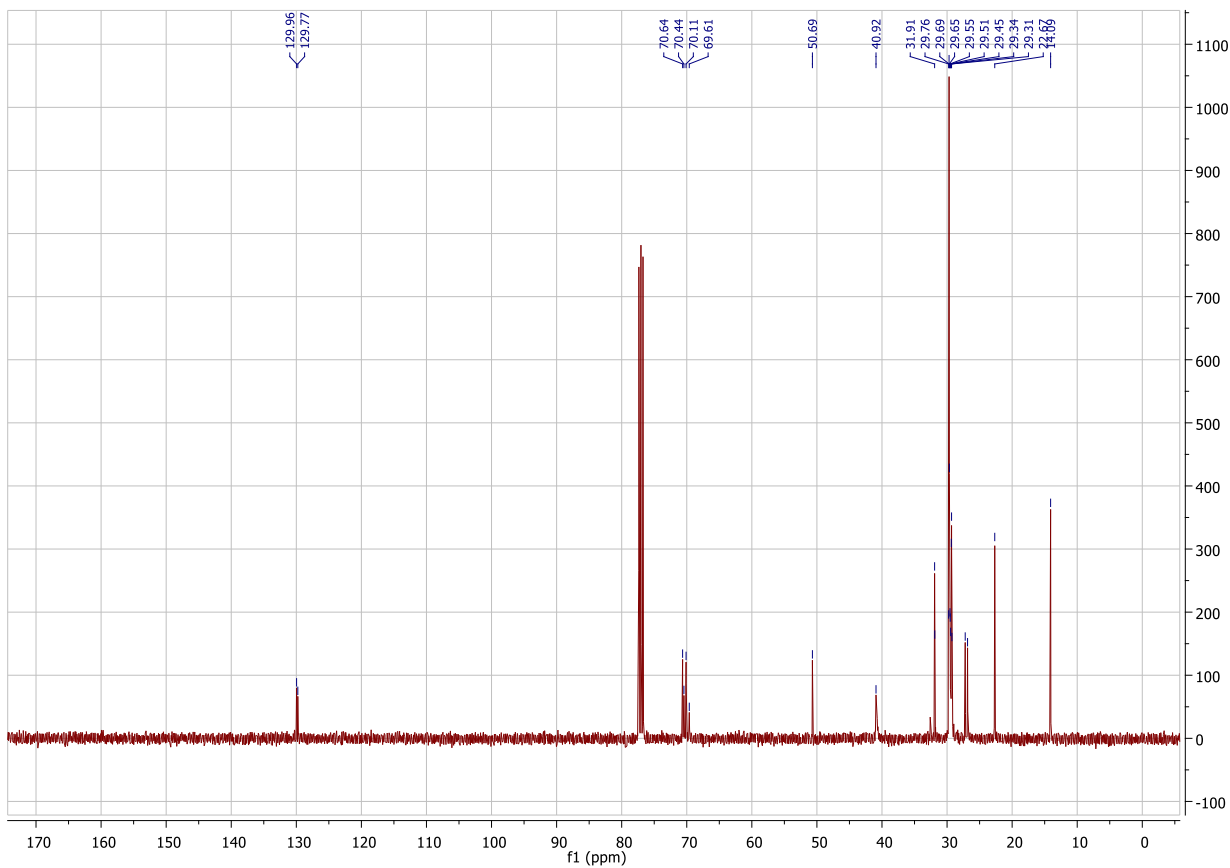

**-L.G.S. - Laboratorio Grandi Strumenti - Display Report**

|               |                                                 |                  |                       |            |                 |
|---------------|-------------------------------------------------|------------------|-----------------------|------------|-----------------|
| Analysis Name | av cpv126.d                                     | Acquisition Date | 01/11/18 15:03:22     | Operator   | Walter Panzeri  |
| Sample Name   |                                                 | Method           | Copy of _01mix_posneg | Instrument | esquire3000plus |
| Comment       | 1 mg/ml dil 1:100 MeOH<br>Richiedente: Pennetta |                  | Im.MS                 |            |                 |

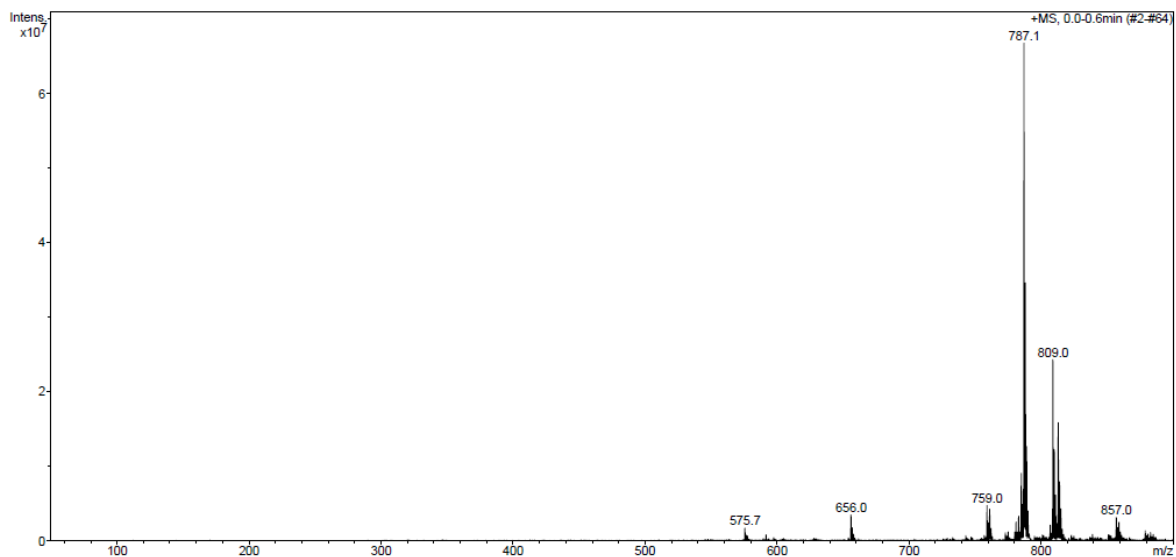

**Figure S9.  $^1\text{H}$  NMR,  $^{13}\text{C}$  NMR, and mass spectra of (3S,8S,9S,10R,13R,14S,17R)-10,13-dimethyl-17-((R)-6-methylheptan-2-yl)-2,3,4,7,8,9,10,11,12,13,14,15,16,17-tetradecahydro-1H-cyclopenta[a]phenanthren-3-yl (4-((4-((2-(2-azidoethoxy)ethoxy)ethyl)amino)-6-(octadecylamino)-1,3,5-triazin-2-yl)amino)butyl)carbamate, 6ac**

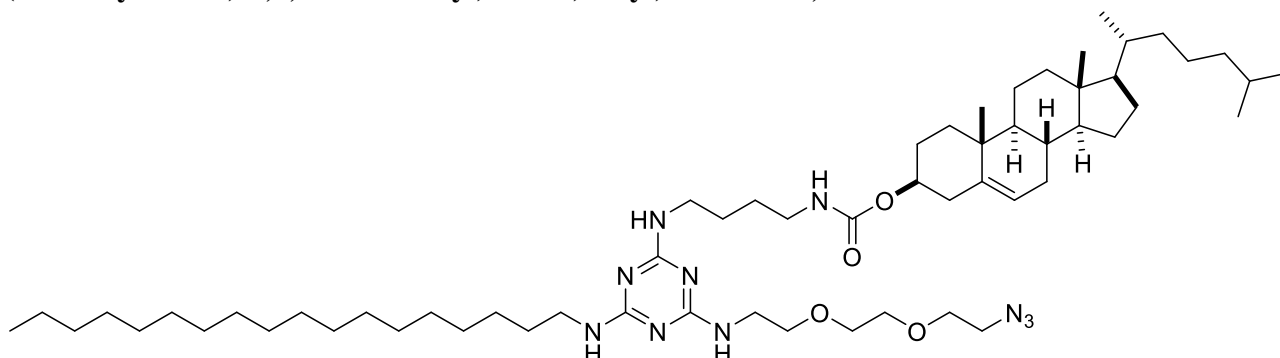

**(3S,8S,9S,10R,13R,14S,17R)-10,13-dimethyl-17-((R)-6-methylheptan-2-yl)-2,3,4,7,8,9,10,11,12,13,14,15,16,17-tetradecahydro-1H-cyclopenta[a]phenanthren-3-yl (4-((4-((2-(2-azidoethoxy)ethoxy)ethyl)amino)-6-(octadecylamino)-1,3,5-triazin-2-yl)amino)butyl)carbamate, 6ac:** white solid, 50% yield.  $R_f = 0.41$  (DCM/MeOH = 90:10);  $^1\text{H}$  NMR (500 MHz,  $\text{CDCl}_3$ )  $\delta$  5.37 (d,  $J = 4.0$  Hz, 1H), 4.49 (br s, 1H), 3.72-3.55 (m, 10H), 3.44-3.29 (m, 6H), 3.23-3.21 (m, 2H), 2.40-2.21 (m, 2H), 2.05-1.92 (m, 2H), 1.91-1.78 (m, 3H), 1.65-0.83 (m, 72H), 0.68 (s, 3H);  $^{13}\text{C}$  NMR (101 MHz,  $\text{CDCl}_3$ )  $\delta$  156.2, 139.8, 122.5, 74.2, 70.6, 70.4, 70.1, 56.7, 56.2, 50.7, 50.0, 42.3, 39.7, 39.5, 37.0, 36.6, 36.2, 35.8, 31.9, 28.2, 28.0, 24.3, 23.8, 22.8, 22.5, 21.0, 19.3, 18.7, 11.9, the aromatic carbons did not appear due to low intensity; ESI (m/z) 1020.0  $[\text{M}+\text{H}, (100)]^+$ ; Anal. calcd. for  $\text{C}_{59}\text{H}_{106}\text{N}_{10}\text{O}_4$ : C 69.51, H 10.48, N 13.74; found: C 69.50, H 10.50, N 13.73.

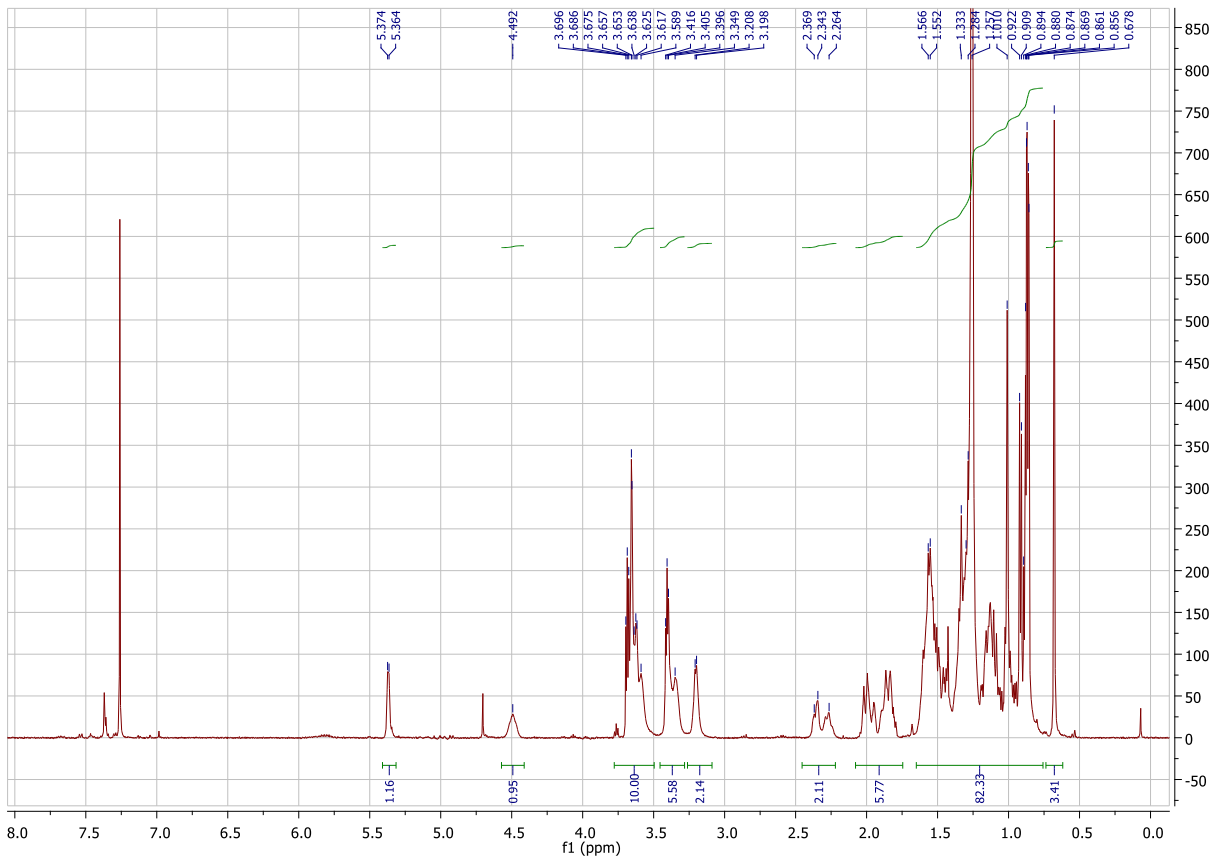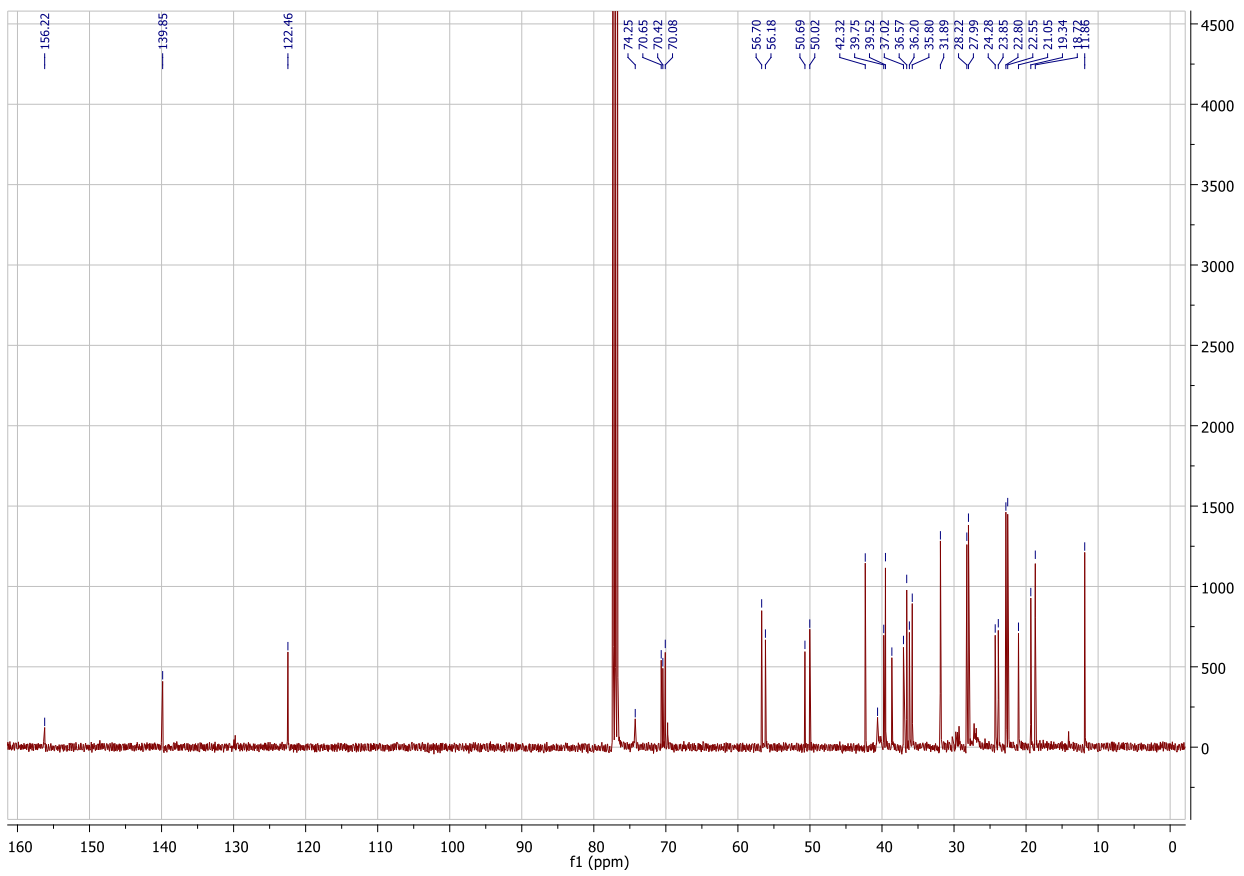



**-L.G.S. - Laboratorio Grandi Strumenti - Display Report**

|               |                                                |                  |                    |            |                 |
|---------------|------------------------------------------------|------------------|--------------------|------------|-----------------|
| Analysis Name | av cp141.d                                     | Acquisition Date | 09/28/18 11:48:51  | Operator   | Walter Panzeri  |
| Sample Name   |                                                | Method           | Copy of _giov 1620 | Instrument | esquire3000plus |
| Comment       | 1 mg/ml dil 1:100 MeOh<br>Richiedente Pennetta |                  | 24713.MS           |            |                 |

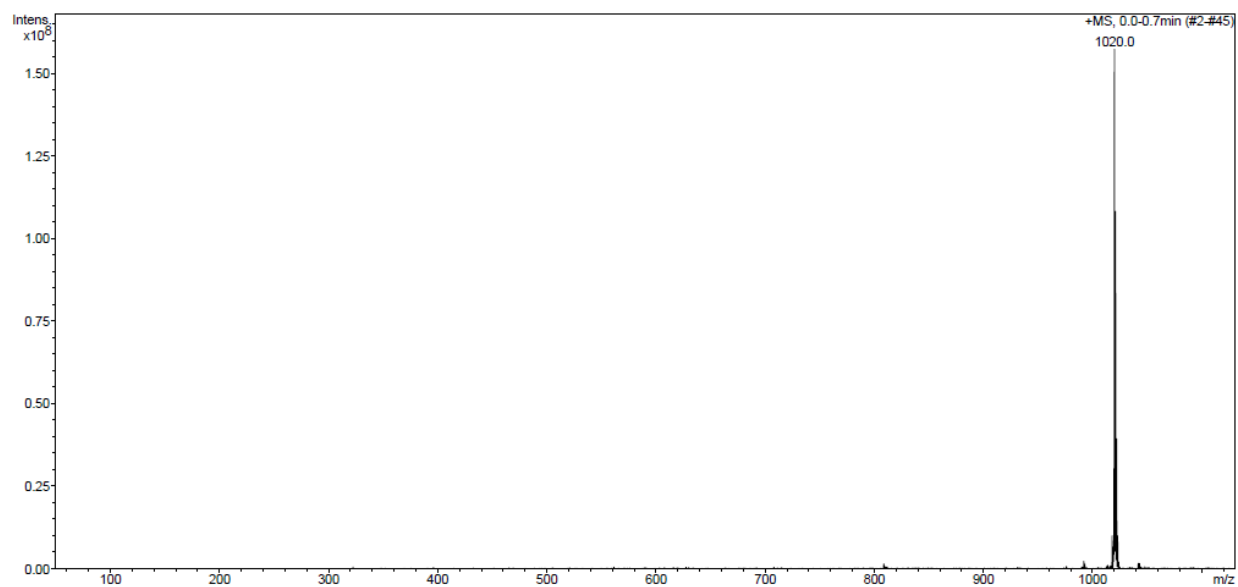

**Figure S10.**  $^1\text{H}$  NMR,  $^{13}\text{C}$  NMR, and mass spectra of (3S,8S,9S,10R,13R,14S,17R)-10,13-dimethyl-17-((R)-6-methylheptan-2-yl)-2,3,4,7,8,9,10,11,12,13,14,15,16,17-tetradecahydro-1H-cyclopenta[a]phenanthren-3-yl (4-((4-((2-(2-(2-azidoethoxy)ethoxy)ethyl)amino)-6-(((Z)-octadec-9-en-1-yl)amino)-1,3,5-triazin-2-yl)amino)butyl)carbamate, **6bc**

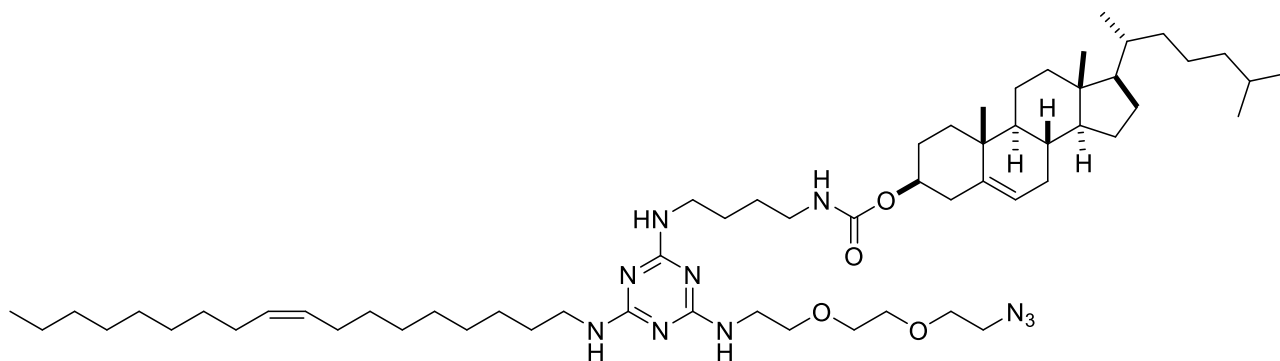

(3S,8S,9S,10R,13R,14S,17R)-10,13-dimethyl-17-((R)-6-methylheptan-2-yl)-2,3,4,7,8,9,10,11,12,13,14,15,16,17-tetradecahydro-1H-cyclopenta[a]phenanthren-3-yl (4-((4-((2-(2-(2-azidoethoxy)ethoxy)ethyl)amino)-6-(((Z)-octadec-9-en-1-yl)amino)-1,3,5-triazin-2-yl)amino)butyl)carbamate, **6bc**: white solid, 55% yield.  $R_f = 0.46$  (DCM/MeOH = 90:10);  $^1\text{H}$  NMR (400 MHz,  $\text{CDCl}_3$ )  $\delta$  5.30-5.26 (m, 3H), 4.42 (br s, 1H), 3.65-3.54 (m, 10H), 3.36-3.31 (m, 6H), 3.16-3.10 (m, 2H), 2.28-2.25 (m, 2H), 1.98-1.77 (m, 6H), 1.35-0.79 (m, 68H), 0.61 (s, 3H).  $^{13}\text{C}$  NMR (101 MHz,  $\text{CDCl}_3$ )  $\delta$  156.3, 140.00, 130.1, 129.9, 128.6, 127.7, 127.1, 122.6, 74.4, 70.8, 70.5, 70.2, 69.9, 65.2, 56.8, 56.3, 50.8, 50.2, 42.4, 41.0, 40.7, 39.9, 39.6, 38.7, 37.1, 36.7, 36.3, 35.9, 32.7, 32.0, 29.9, 29.8, 29.8, 29.6, 29.6, 29.4, 29.3, 29.1, 28.3, 28.1, 27.3, 27.0, 24.4, 23.9, 22.9, 22.8, 22.7, 21.2, 19.5, 18.8, 14.2, 12.0. ESI (m/z) 1018.1  $[\text{M}+\text{H}, (100)]^+$ ; Anal. calcd. for  $\text{C}_{59}\text{H}_{104}\text{N}_{10}\text{O}_4$ : C 69.64, H 10.30, N 13.77; found: C 69.65, H 10.32, N 13.76.

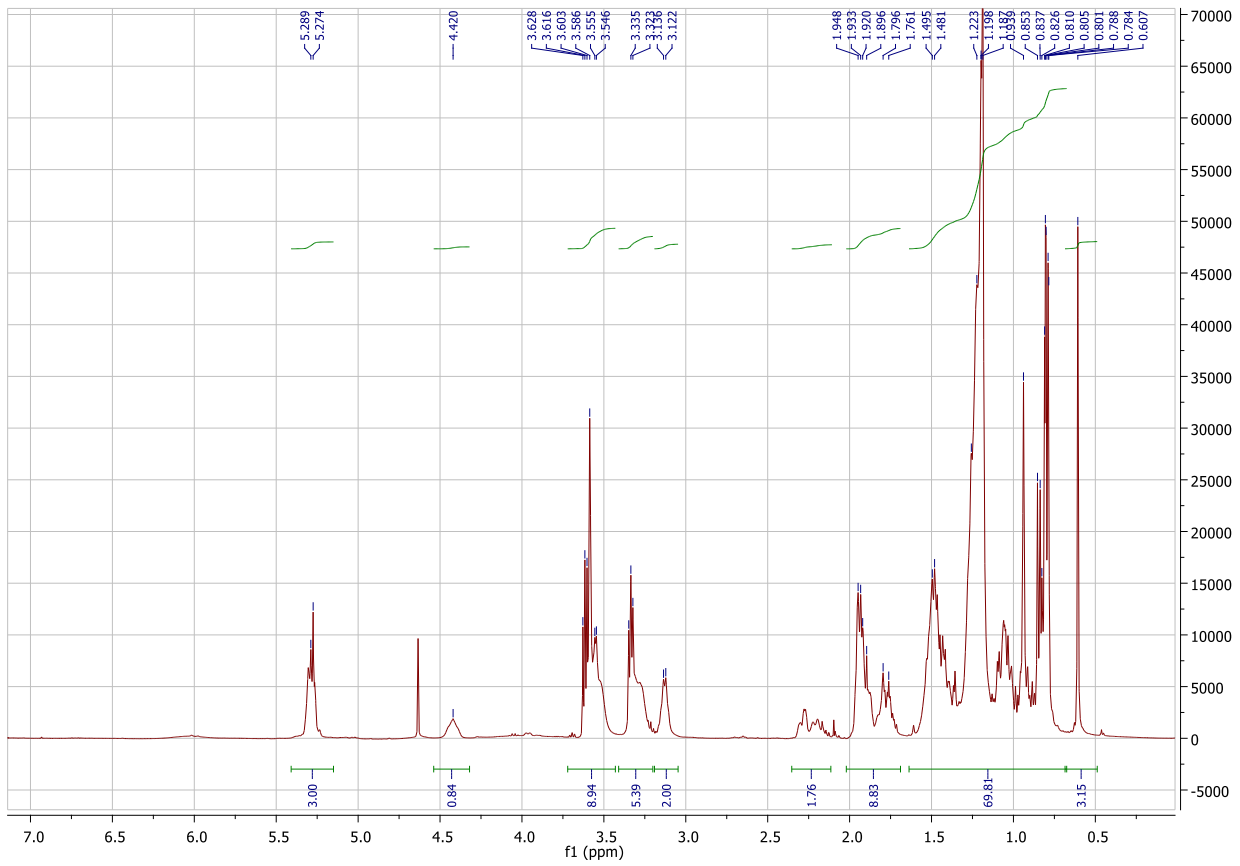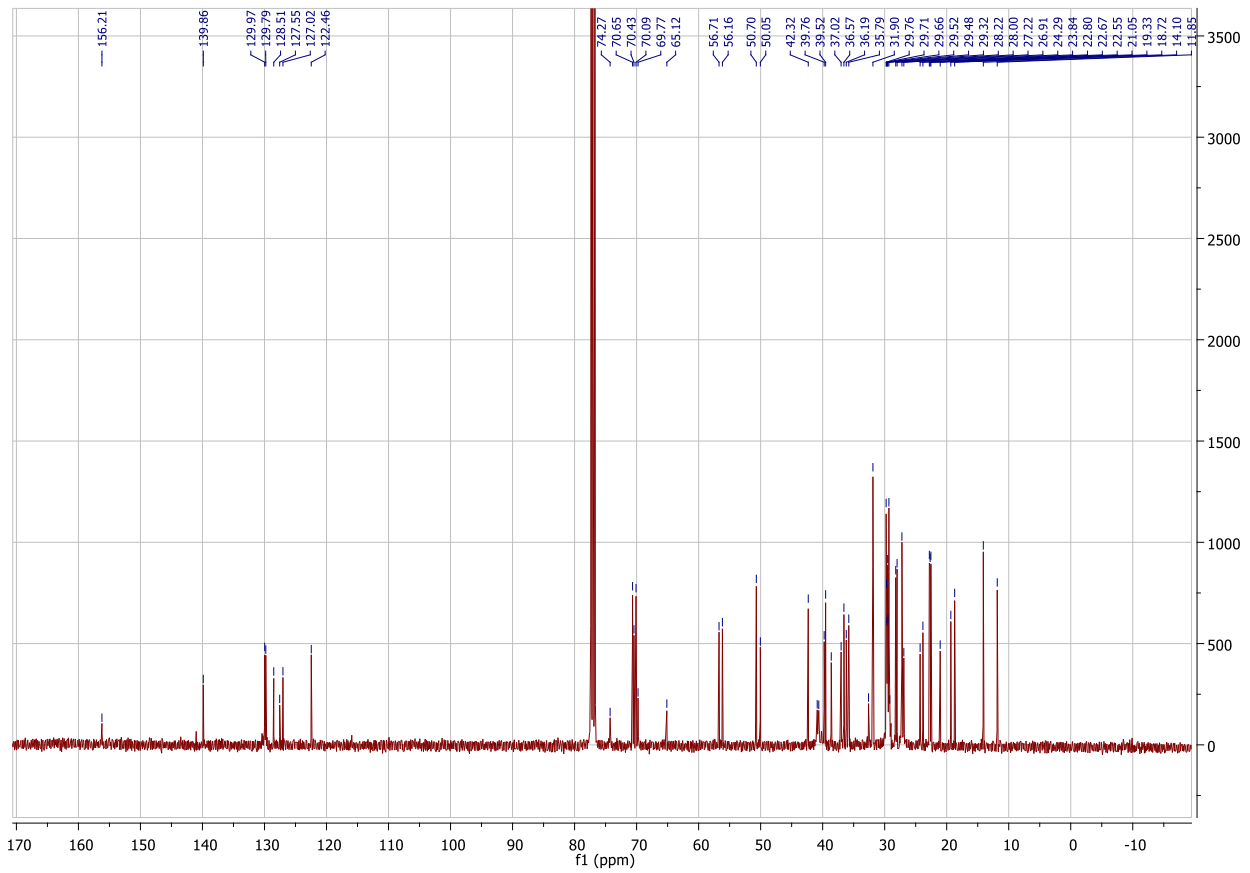

-L.G.S. - Laboratorio Grandi Strumenti - Display Report

|               |                                                 |                  |                       |            |                 |
|---------------|-------------------------------------------------|------------------|-----------------------|------------|-----------------|
| Analysis Name | av cp141 28.11.18.d                             | Acquisition Date | 11/28/18 15:12:45     | Operator   | Walter Panzeri  |
| Sample Name   |                                                 | Method           | Copy(2) of _giov 1620 | Instrument | esquire3000plus |
| Comment       | 1 mg/ml dil 1:100 MeOH<br>Richiedente: Pennetta |                  | 24713.MS              |            |                 |

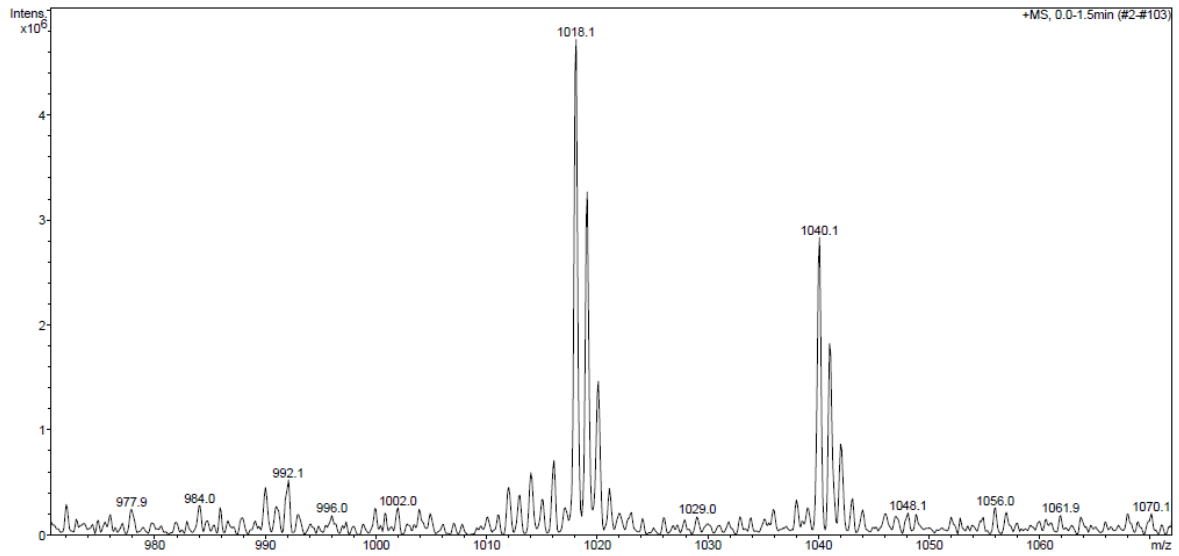

**Figure S11. <sup>1</sup>H NMR and mass spectra of compound Boc-8a and <sup>1</sup>H NMR and <sup>13</sup>C NMR derivative 1\_ST (compound 8a)**

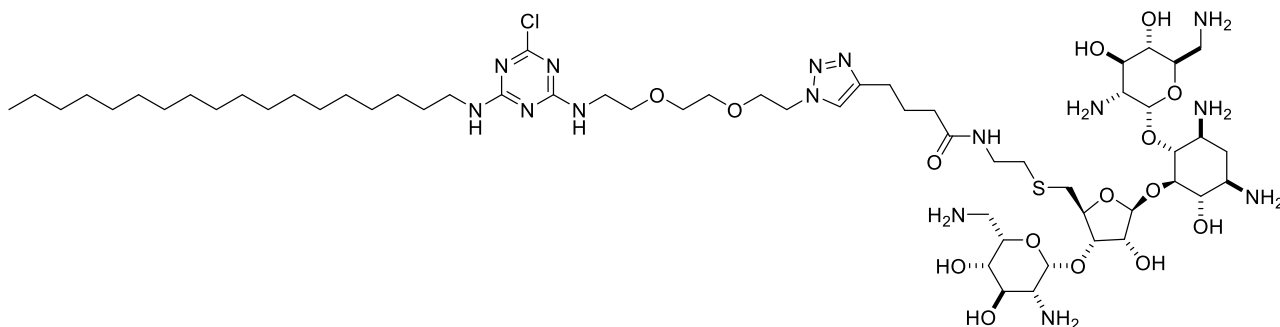

**Compound Boc-8a:**  $R_f = 0.32$  (DCM/MeOH = 90:10); <sup>1</sup>H NMR (400 MHz, CD<sub>3</sub>OD)  $\delta$  7.80 (s, 1H), 5.37 (s, 1H), 5.15 (s, 1H), 4.93 (s, 1H), 4.55 (t,  $J = 5.2$  Hz, 2H), 4.26-4.23 (m, 2H), 4.12-4.10 (m, 1H), 3.91-3.88 (m, 4H), 3.78-3.75 (m, 2H), 3.65-3.35 (m, 25H), 2.90 (d,  $J = 5.5$  Hz, 2H), 2.78-2.71 (m, 4H), 2.29 (t,  $J = 7.3$  Hz, 2H), 1.99-1.96 (m, 3H), 1.64-1.44 (m, 57H), 1.34-1.24 (m, 30H), 0.90 (t,  $J = 6.6$  Hz, 3H). ESI (m/z) 1946,5 [M+Na, (100)]<sup>+</sup>

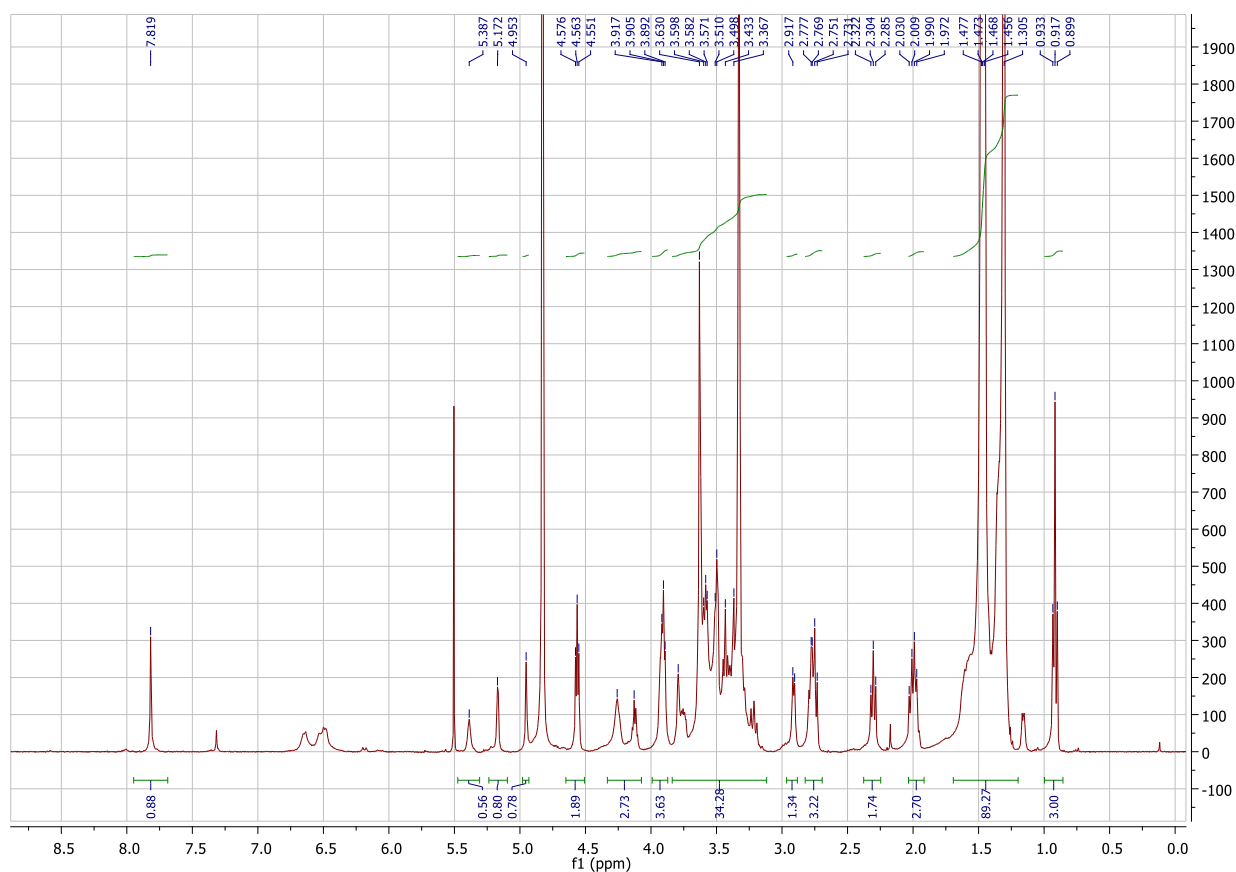

-L.G.S. - Laboratorio Grandi Strumenti - Display Report

Analysis Name av cpv130b.d  
Sample Name  
Comment 1 mg/ml dil 1:100 MeOH  
Richiedente: Pennetta

Acquisition Date 01/11/18 11:06:46  
Method Copy of \_01tmix\_posneg  
hm.MS

Operator Walter Panzeri  
Instrument esquire3000plus

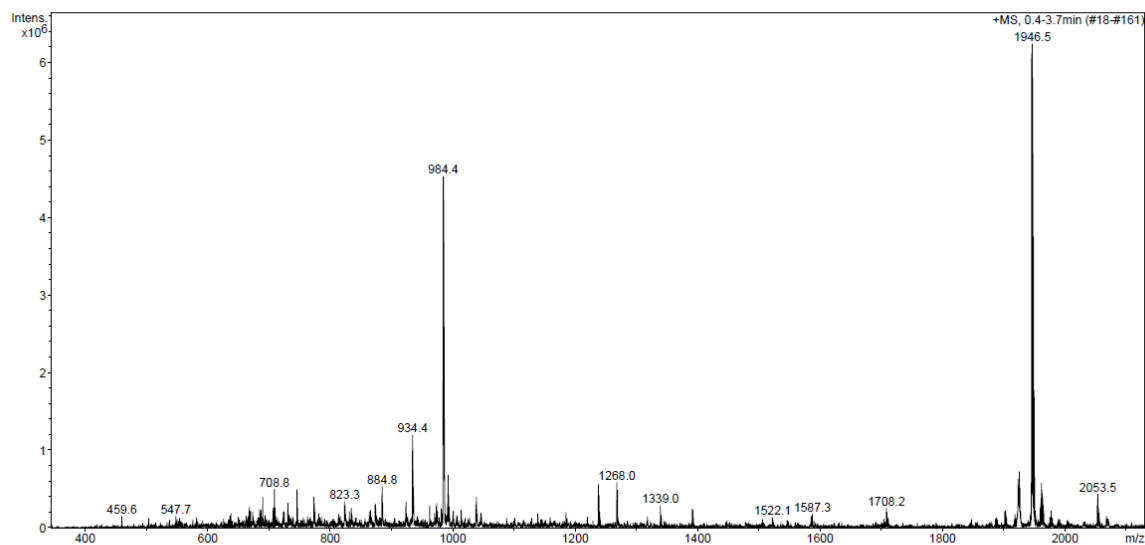

Bruker Daltonics DataAnalysis 3.1

printed: 01/11/18 11:11:01

Page 1 of 1

**Compound 8a** white solid, 50% yield in two steps.  $^1\text{H}$  NMR (400 MHz,  $\text{CD}_3\text{OD}$ )  $\delta$  7.83 (s, 1H), 6.06 (d,  $J=3.7$  Hz, 1H), 5.43 (d,  $J=3.7$  Hz, 1H), 5.34 (s, 1H), 4.55 (t,  $J=4.7$  Hz, 2H), 4.44 (t,  $J=4.6$  Hz, 1H), 4.38-4.31 (m, 3H), 4.20-4.03 (m, 4H), 3.92-3.89 (m, 4H), 3.69-3.55 (m, 12H), 3.52-3.35 (m, 12H), 2.75-2.72 (m, 5H), 2.48-2.45 (m, 1H), 2.29 (t,  $J=6.9$  Hz, 2H), 1.99-1.88 (m, 3H), 1.65-1.63 (m, 1H), 1.34-1.27 (m, 30H), 0.89 (t, 7.36 Hz, 3H).  $^{13}\text{C}$  NMR (101 MHz,  $\text{CD}_3\text{OD}$ )  $\delta$  174.5, 161.4, 161.1, 156.6, 156.4, 110.6, 95.5, 95.0, 86.1, 74.9, 74.0, 72.7, 71.8, 70.7, 70.0, 69.0, 68.3, 68.0, 67.8, 60.1, 54.1, 51.6, 50.0, 49.8, 48.8, 41.3, 41.1, 40.6, 31.6, 29.3, 29.2, 29.0, 28.9, 28.5, 26.4, 24.3, 22.3, 13.0; Anal. calcd. for  $\text{C}_{58}\text{H}_{108}\text{ClN}_{15}\text{O}_{15}\text{S}$ : C 52.65, H 8.23, N 15.88; found: C 52.66, H 8.21, N 15.87.

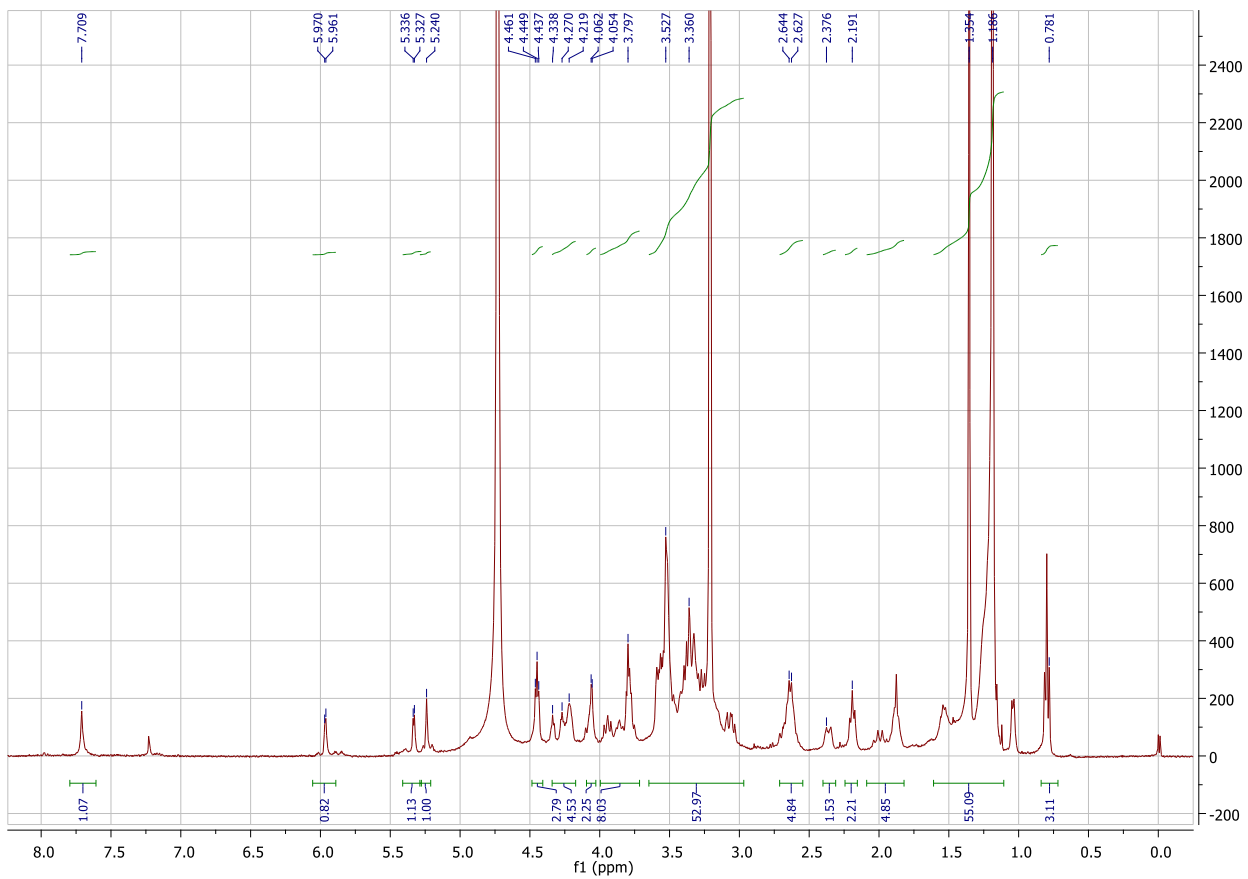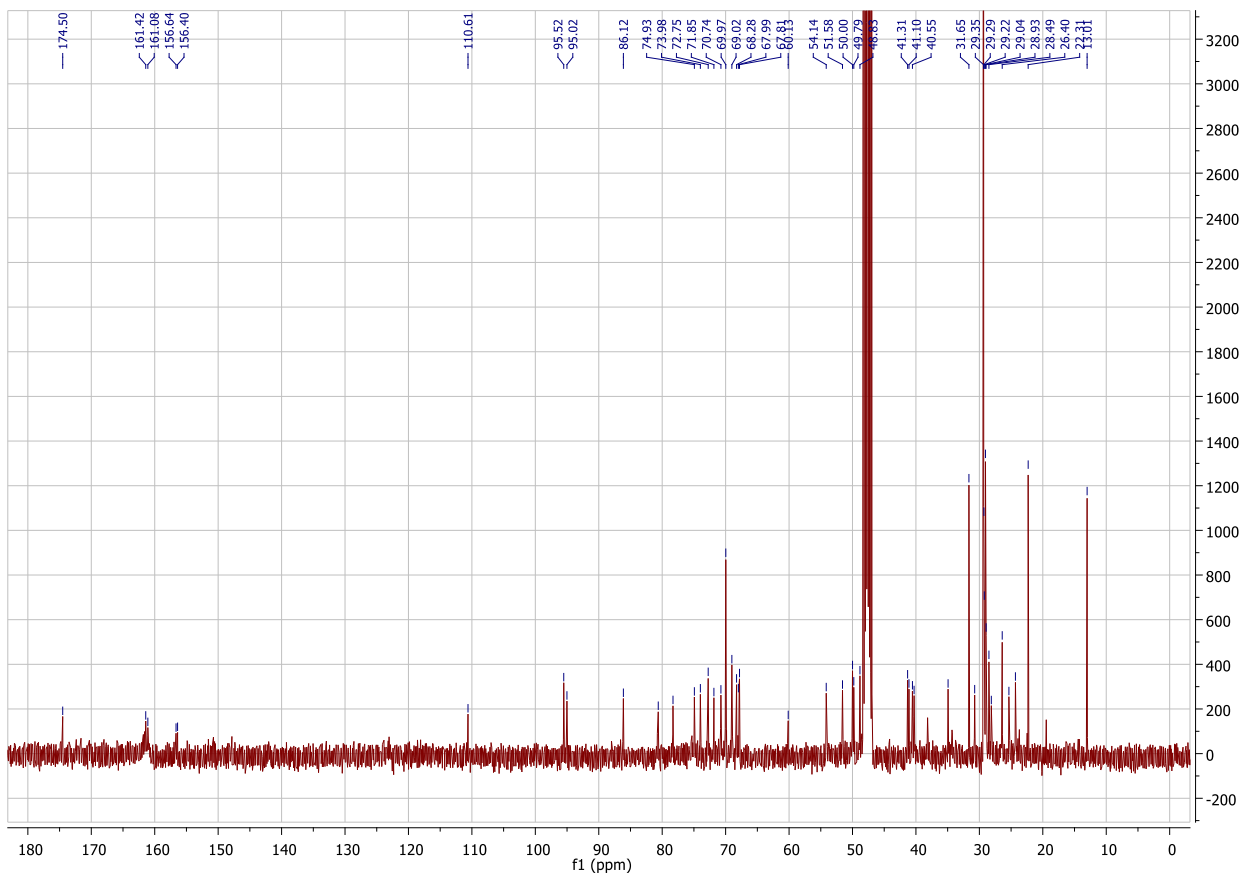

**Figure S12. Mass spectra of compound Boc-8b and <sup>1</sup>H NMR and <sup>13</sup>C NMR derivative 1\_OL (compound 8b)**

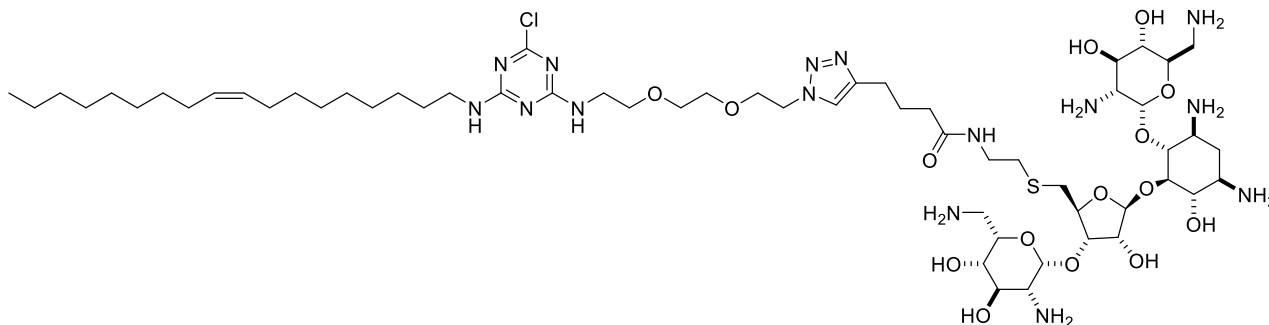

**Compound Boc-8b:**  $R_f = 0.35$  (DCM/MeOH = 90:10); <sup>1</sup>H NMR (400 MHz, CD<sub>3</sub>OD)  $\delta$  7.80 (s, 1H), 5.36-5.33 (m, 3H), 5.15 (d,  $J = 2,3$  Hz, 1H), 4.93 (s, 1H), 4.54 (t,  $J = 5.1$  Hz, 2H), 4.25-4.22 (m, 2H), 4.11-4.08 (m, 1H), 3.95-3.90 (m, 4H), 3.79-3.76 (m, 2H), 3.65-3.35 (m, 25H), 2.90 (d,  $J = 5,5$  Hz, 2H), 2.78-2.71 (m, 4H), 2.28 (t,  $J = 7,4$  Hz, 2H), 2.04-1.95 (m, 7H), 1.59-1.52 (m, 3H), 1.50-1.40 (m, 54H), 1.32-1.24 (m, 22H), 0.90 (t,  $J = 6,6$  Hz, 3H). ESI (m/z) 1944,6 [M+Na, (100)]<sup>+</sup>

-L.G.S. - Laboratorio Grandi Strumenti - Display Report

|               |                                                 |                  |                        |            |                 |
|---------------|-------------------------------------------------|------------------|------------------------|------------|-----------------|
| Analysis Name | av cpv83.d                                      | Acquisition Date | 02/24/17 13:52:09      | Operator   | Walter Panzeri  |
| Sample Name   |                                                 | Method           | Copy of _01tmix_posneg | Instrument | esquire3000plus |
| Comment       | 1 mg/mL dil 1:100 MeOH<br>Richiedente: Pennetta |                  | hm.MS                  |            |                 |

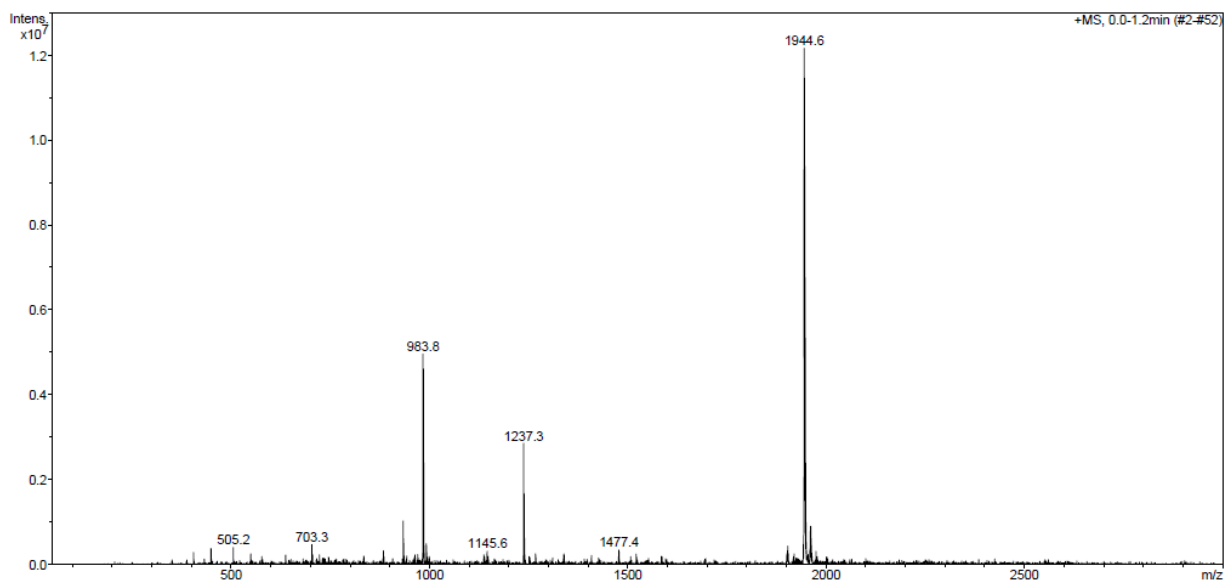



**Compound 8b:** yellowish solid, 35% yield in 2 steps.  $^1\text{H}$  NMR (400 MHz,  $\text{CD}_3\text{OD}$ )  $\delta$  7.71 (s, 1H), 5.94 (d,  $J = 6.2$  Hz, 1H), 5.32-5.24 (m, 4H), 4.45 (t,  $J = 4.8$  Hz, 2H), 4.33 (m, 2H), 4.16 (m, 1H), 3.89 (m, 4H), 3.70 (b, 2H), 3.62-3.35 (m, 25H), 2.75-2.71 (m, 6H), 2.28 (t,  $J = 7.2$  Hz, 2H), 2.03-1.95 (m, 7H), 1.61-1.56 (m, 3H), 1.29-1.10 (m, 22H), 0.89 (t,  $J = 7.2$  Hz, 3H).  $^{13}\text{C}$  NMR (101 MHz,  $\text{CD}_3\text{OD}$ )  $\delta$  148.2, 130.9, 130.8, 124.2, 112.1, 96.8, 96.4, 87.6, 79.7, 76.9, 75.3, 74.2, 73.2, 72.1, 71.3, 71.2, 70.4, 70.0, 69.6, 69.2, 55.6, 52.9, 51.3, 50.3, 49.6, 49.4, 49.2, 49.0, 48.8, 48.6, 48.4, 42.1, 41.9, 41.7, 38.4, 36.3, 33.6, 33.0, 32.2, 30.8, 30.7, 30.6, 30.4, 30.3, 30.2, 30.1, 28.1, 27.8, 26.7, 25.7, 23.7, 14.4; Anal. calcd. for  $\text{C}_{58}\text{H}_{106}\text{ClN}_{15}\text{O}_{15}\text{S}$ : C 52.73, H 8.09, N 15.90; found: C 52.75, H 8.10, N 15.91.

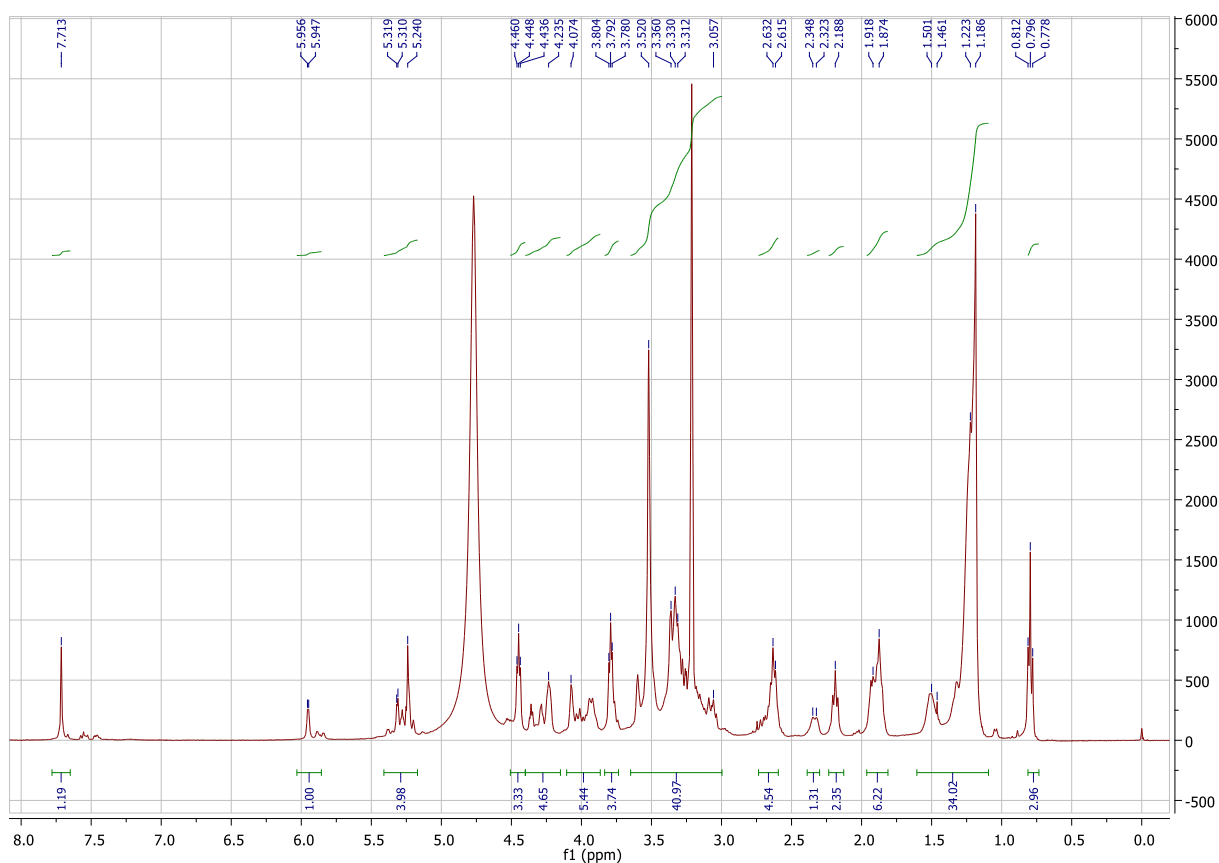

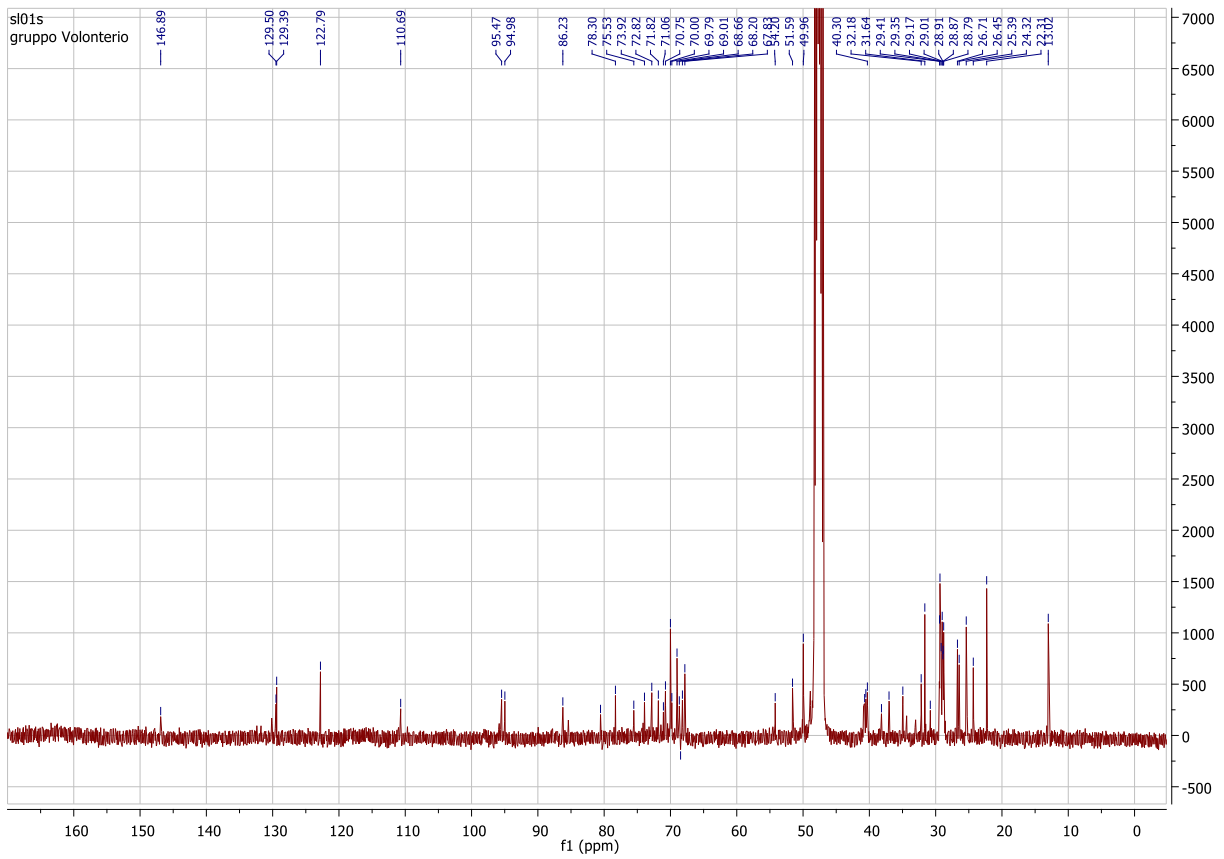

**Figure S13.**  $^1\text{H}$  NMR and mass spectra of compound **Boc-8c** and  $^1\text{H}$  NMR and  $^{13}\text{C}$  NMR spectra of derivative **1\_Chol** (compound **8c**)

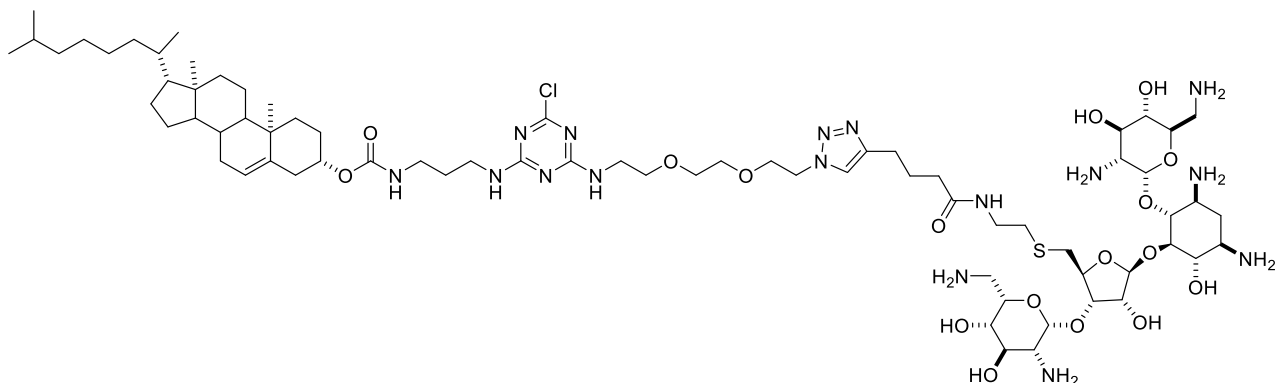

**Compound Boc-8c:**  $R_f = 0.27$  (DCM/MeOH = 90:10);  $^1\text{H}$  NMR (400 MHz,  $\text{CD}_3\text{OD}$ )  $\delta$  7.80 (s, 1H), 5.38-5.36 (m, 2H), 5.15 (s, 1H), 4.93 (s, 1H), 4.55 (t,  $J = 5.1$  Hz, 3H), 3.91-3.88 (m, 5H), 3.79-3.76 (m, 3H), 3.61-3.37 (m, 32H), 3.14-3.11 (m, 2H), 2.90 (d,  $J = 5.0$  Hz, 1H), 2.77-2.74 (m, 4H), 2.31-2.30 (m, 3H), 1.99-1.95 (m, 5H), 1.87-1.85 (m, 2H), 1.60-0.87 (m, 89H), 0.72 (s, 3H). ESI ( $m/z$ ) 2177,5 [ $\text{M}+\text{Na}$ , (100)] $^+$

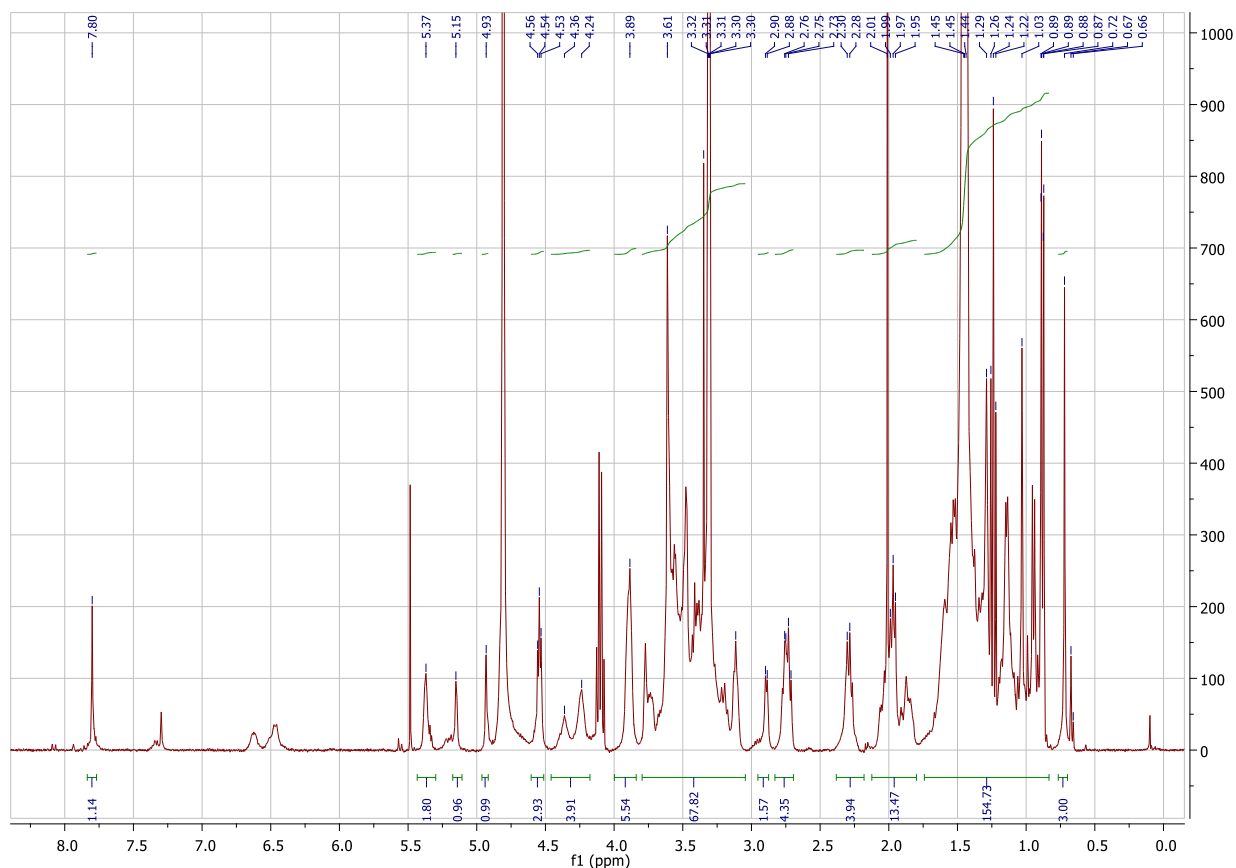

-L.G.S. - Laboratorio Grandi Strumenti - Display Report

Analysis Name av cpv129c.d  
Sample Name  
Comment 1 mg/ml dil 1:100 MeOH  
Richiedente: Pennetta

Acquisition Date 01/11/18 09:46:54  
Method Copy of \_01tmix\_posneg  
hm.MS

Operator Walter Panzeri  
Instrument esquire3000plus

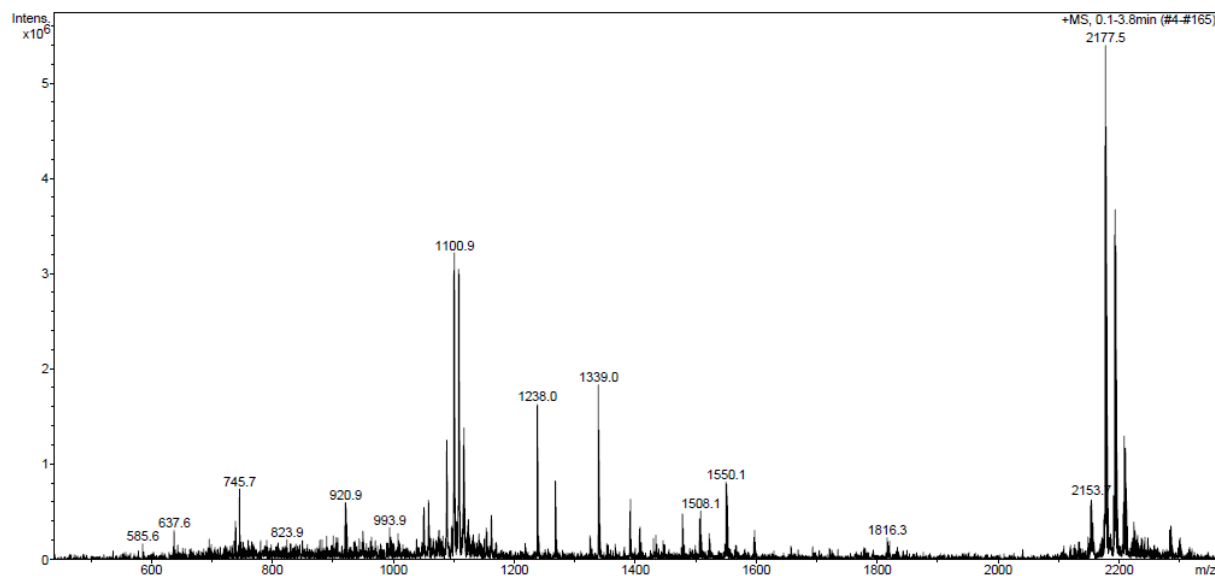

Bruker Daltonics DataAnalysis 3.1

printed: 01/11/18 09:52:41

Page 1 of 1

**Compound 8c:** yellowish solid, 60% yield in two steps.  $^1\text{H}$  NMR (400 MHz,  $\text{CD}_3\text{OD}$ )  $\delta$  7.85 (d,  $J = 3.2$  Hz, 1H), 6.10 (d,  $J = 3.6$  Hz, 1H), 5.47 (d,  $J = 4.1$  Hz, 1H), 5.38 (m, 2H), 4.59 (t,  $J = 5.2$  Hz, 2H), 4.46 (t,  $J = 4.4$  Hz, 1H), 3.93 (m, 2H), 3.69-3.41 (m, 29H), 3.17 (m, 2H), 3.03 (m, 1H), 2.81-2.73 (m, 4H), 2.51 (m, 2H), 2.33 (m, 2H), 2.14 (m, 2H), 1.86 (m, 2H), 1.65-0.86 (m, 46 H), 0.77 (m, 3H).  $^{13}\text{C}$  NMR (101 MHz,  $\text{CD}_3\text{OD}$ )  $\delta$  175.9, 163.3, 163.2, 162.9, 124.1, 112.0, 96.9, 96.4, 87.5, 82.1, 79.7, 76.3, 75.4, 74.1, 73.2, 72.2, 71.3, 70.4, 69.4, 69.3, 61.5, 58.3, 57.6, 55.5, 52.9, 51.4, 51.2, 50.2, 43.5, 43.4, 42.5, 41.9, 41.7, 40.7, 37.8, 37.4, 37.1, 36.3, 32.9, 32.1, 30.7, 29.5, 29.3, 29.1, 26.8, 25.7, 24.9, 23.2, 22.9, 22.1, 20.8, 19.8, 19.2, 14.4, 12.3. Anal. calcd. for  $\text{C}_{72}\text{H}_{125}\text{ClN}_{16}\text{O}_{17}\text{S}$ : C 55.64, H 8.11, N 14.42; found: C 55.65, H 8.13, N 14.42.

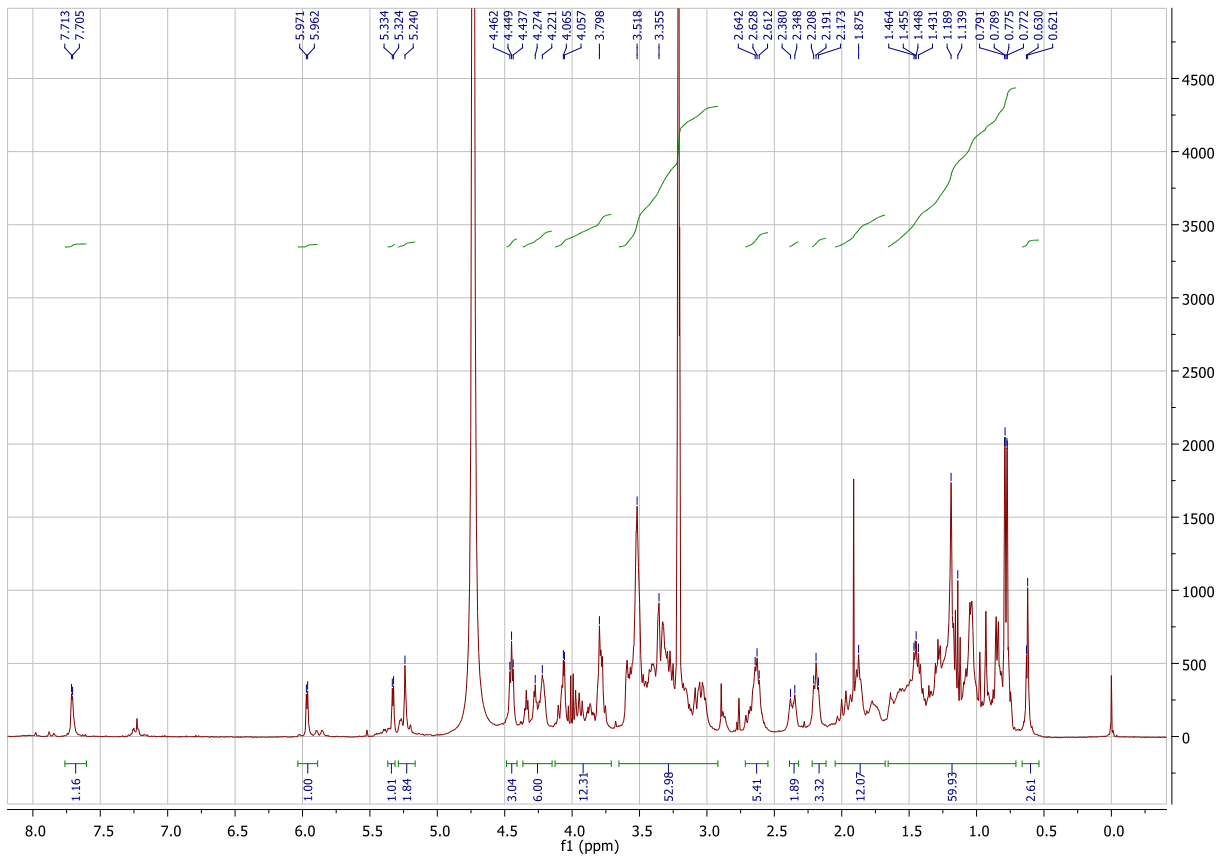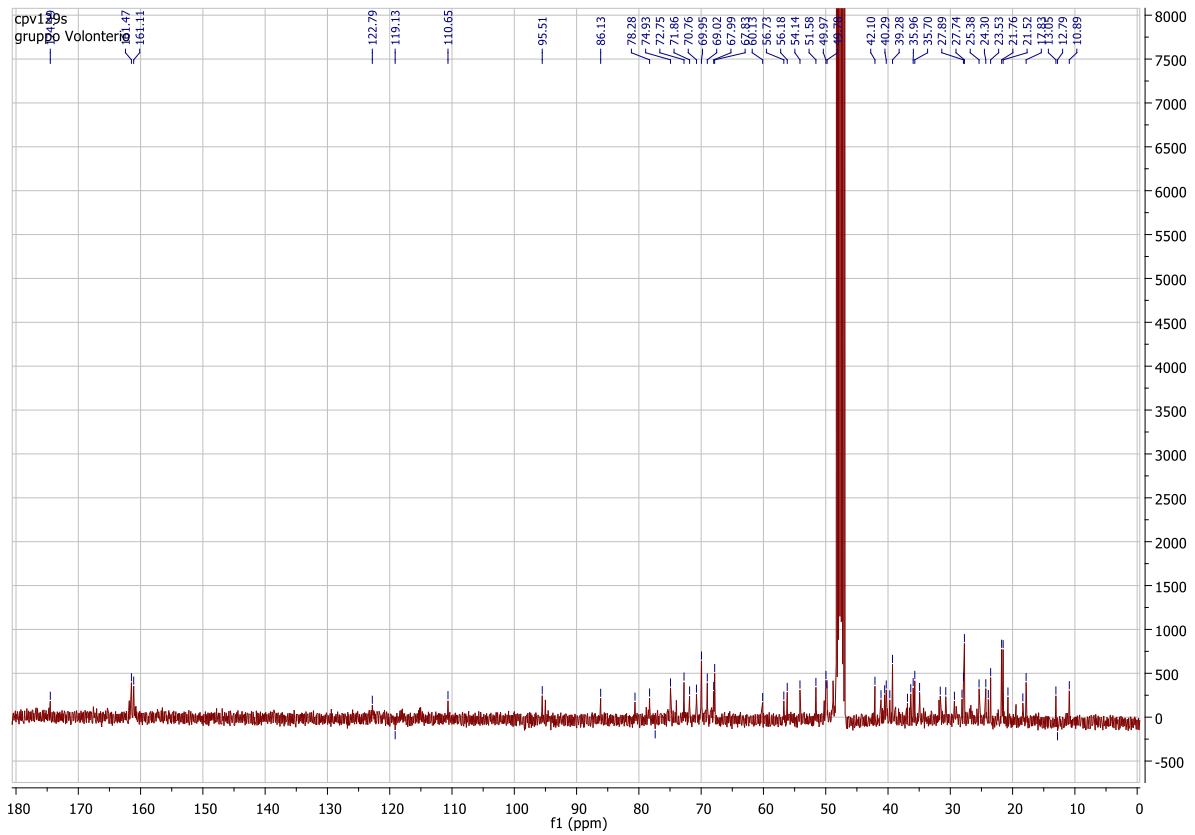

**Figure S14.**  $^1\text{H}$  NMR and mass spectra of compound Boc-9aa and  $^1\text{H}$  NMR and  $^{13}\text{C}$  NMR spectra of derivative 2\_ST (compound 9aa)

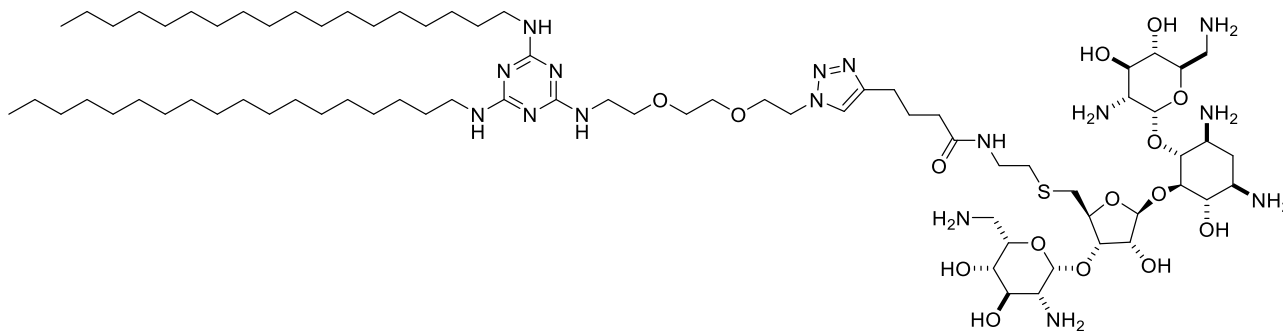

**Compound Boc-9aa:**  $R_f = 0.29$  (DCM/MeOH = 90:10);  $^1\text{H}$  NMR (500 MHz,  $\text{CD}_3\text{OD}$ )  $\delta$  7.79 (s, 1H), 5.36 (s, 1H), 5.15 (s, 1H), 4.81 (s, 1H), 4.54 (t, 2H), 4.23 (m, 2H), 4.10 (m, 1H), 3.92-3.87 (m, 4H), 3.78-3.72 (m, 2H), 3.68-3.37 (m, 27H), 2.89 (d, 2H), 2.79-2.69 (m, 4H), 2.27 (t, 2H), 1.97 (m, 3H), 1.56 (b, 5H), 1.45 (m, 54H), 1.33-1.29 (m, 60H), 0.90 (t,  $J=5.7\text{Hz}$ , 6H). ESI (m/z) 2157,4  $[\text{M}+\text{H}, (48)]^+$

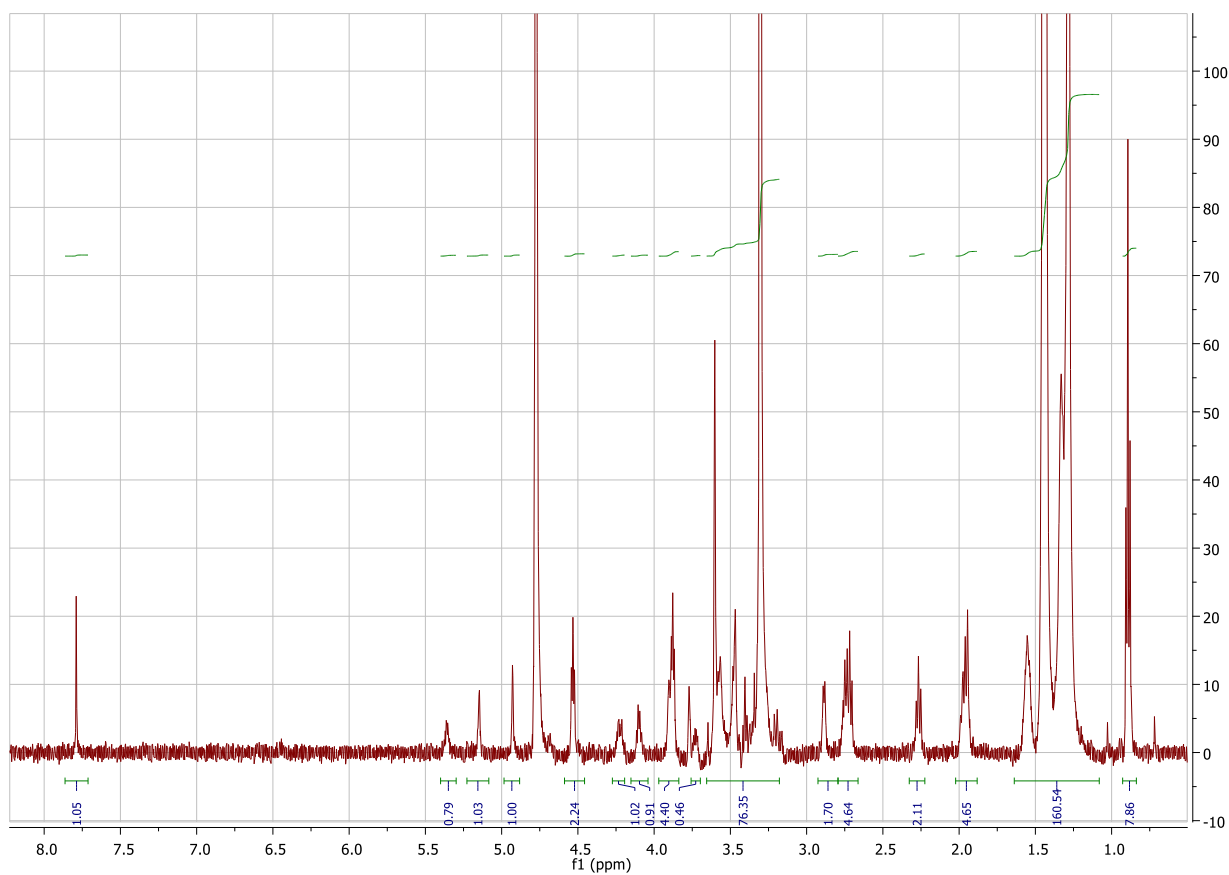

-L.G.S. - Laboratorio Grandi Strumenti - Display Report

Analysis Name av cpv135.d  
Sample Name  
Comment 1 mg/ml dil 1:100 MeOH  
Richiedente: Pennetta

Acquisition Date 02/15/18 11:33:37  
Method Copy of \_01tmix\_posneg  
hm.MS

Operator Walter Panzeri  
Instrument esquire3000plus

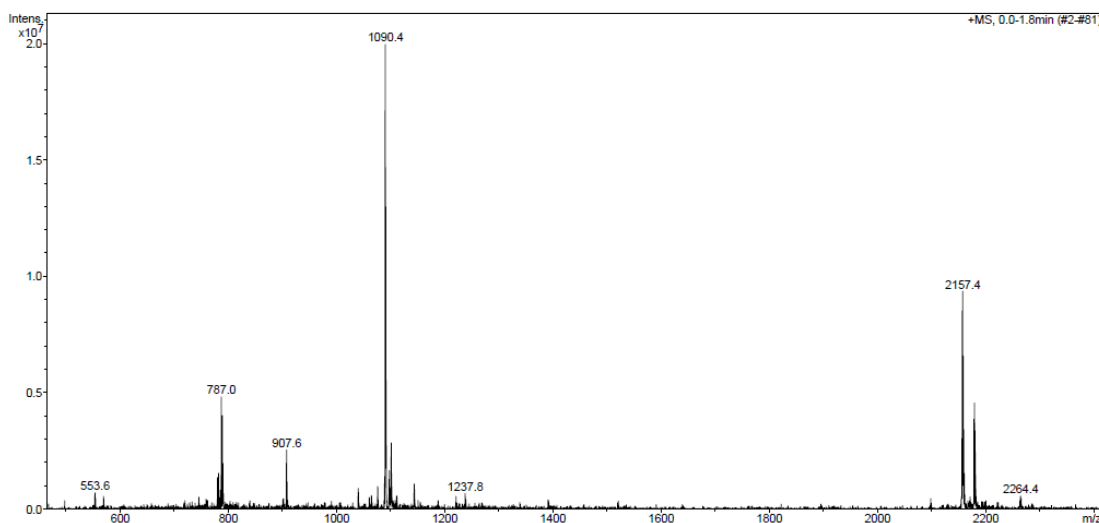

Bruker Daltonics DataAnalysis 3.1

printed: 02/15/18 11:36:17

Page 1 of 1

**Compound 9aa:** white solid, 55% yield in two steps.  $^1\text{H}$  NMR (400 MHz,  $\text{CD}_3\text{OD}$ )  $\delta$  7.79 (s, 1H), 6.06 (d,  $J$  = 4.2 Hz, 1H), 5.43 (d,  $J$  = 3.6 Hz, 1H), 5.34 (s, 1H), 4.54 (m, 2H), 4.39-4.28 (m, 2H), 4.16 (t,  $J$  = 3.2 Hz, 1H), 3.89 (m, 4H), 3.69-3.54 (m, 13H), 3.48-3.33 (m, 16H), 3.31 (m, 2H), 2.73 (m, 4H), 2.29 (t,  $J$  = 7.6 Hz, 2H), 1.97 (m, 3H), 1.60 (m, 5H), 1.29 (m, 60H), 0.90 (t,  $J$  = 6.8 Hz, 6H);  $^{13}\text{C}$  NMR (101 MHz,  $\text{CD}_3\text{OD}$ )  $\delta$  109.6, 94.5, 94.0, 85.1, 79.6, 77.3, 73.0, 71.7, 70.8, 69.7, 69.0, 68.9, 68.0, 66.8, 53.1, 50.6, 48.9, 48.8, 47.8, 39.5, 39.2, 37.1, 33.9, 30.6, 29.7, 28.3, 28.0, 25.7, 24.3, 23.3, 21.3, 12.0, the aromatic carbons did not appear due to low intensity; Anal. calcd. for  $\text{C}_{76}\text{H}_{146}\text{N}_{16}\text{O}_{15}\text{S}$ : C 58.66, H 9.46, N 14.40; found: C 58.67, H 9.45, N 14.43.

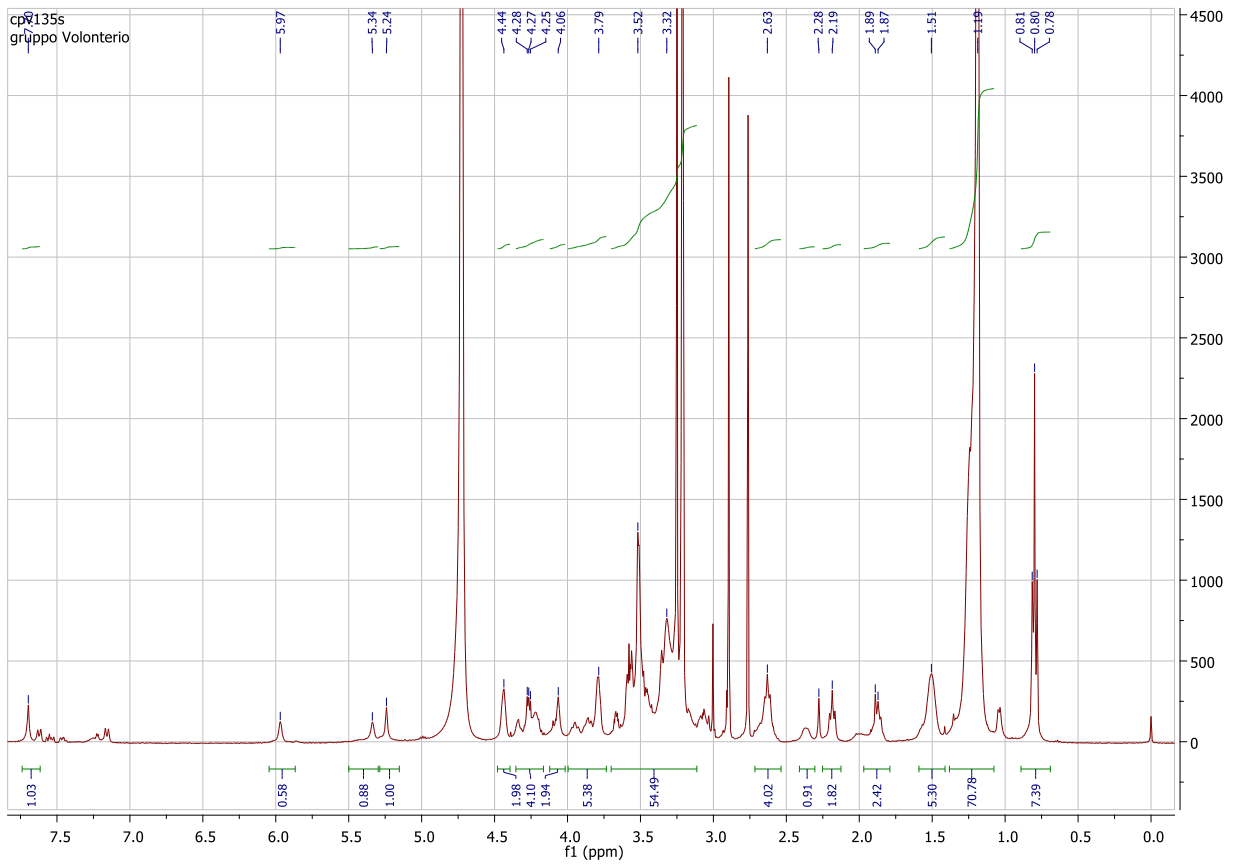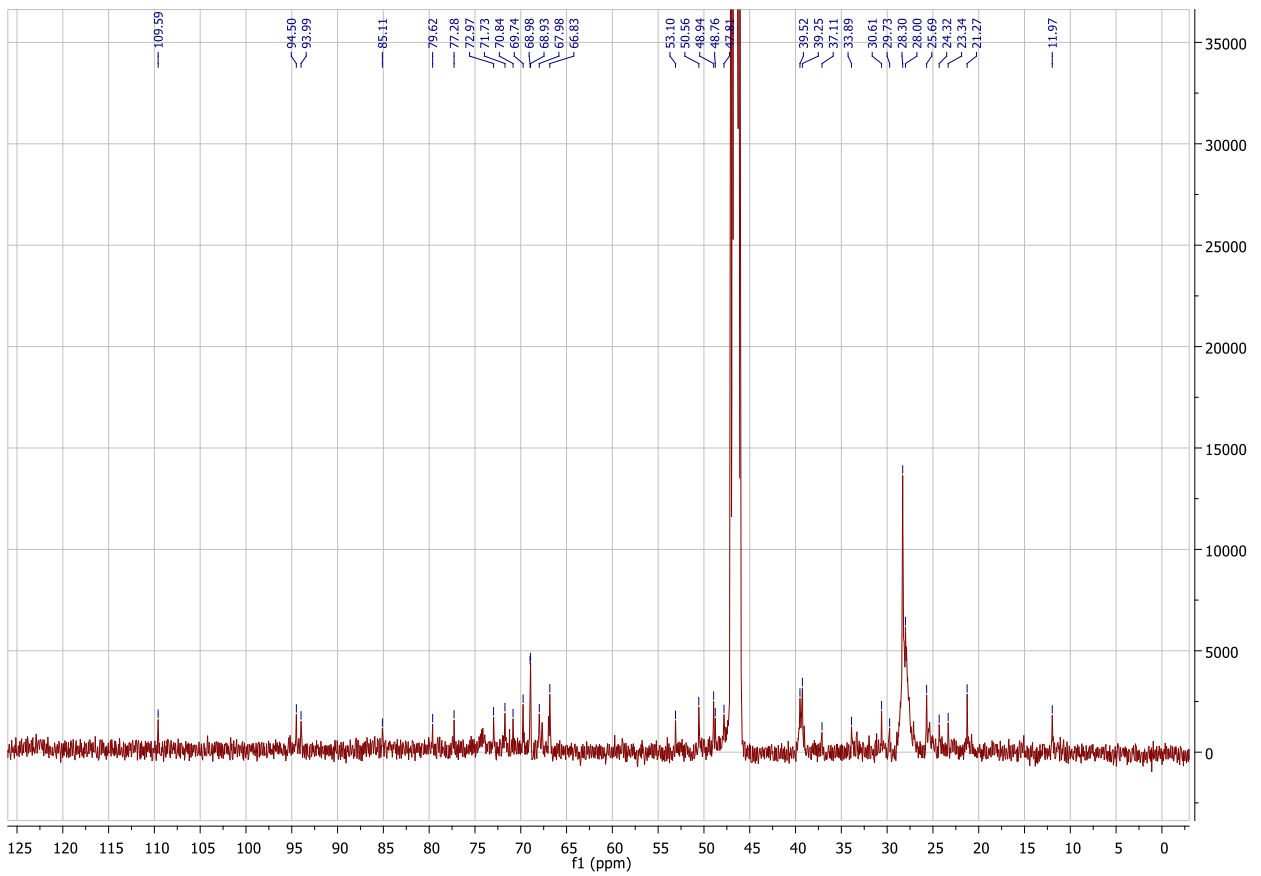



**Figure S15.  $^1\text{H}$  NMR and mass spectra of compound Boc-9bb and  $^1\text{H}$  NMR and  $^{13}\text{C}$  NMR spectra of derivative 2\_OL (compound 9bb)**

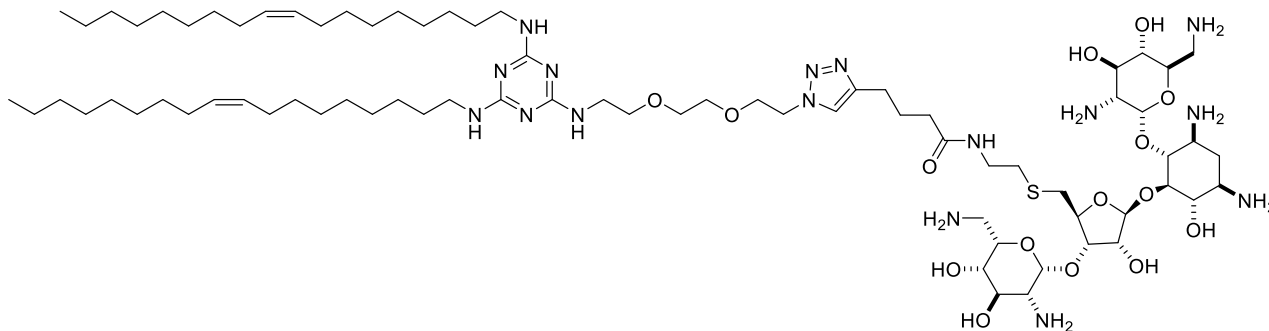

**Compound Boc-9bb:**  $R_f = 0.31$  (DCM/MeOH = 90:10);  $^1\text{H}$  NMR (400 MHz,  $\text{CD}_3\text{OD}$ )  $\delta$  7.80 (s, 1H), 5.41-5.32 (m, 5H), 5.15 (s, 1H), 4.93 (s, 1H), 4.54 (t, 2H), 4.24 (b, 2H), 4.11 (m, 1H), 3.91-3.87 (m, 4H), 3.78-3.71 (m, 2H), 3.65-3.36 (m, 27H), 2.88 (d, 2H), 2.77-2.70 (m, 4H), 2.27 (t, 2H), 2.04-1.95 (m, 11H), 1.56 (m, 5H), 1.46 (m, 54H), 1.32 (m, 44H) 0.90 (t, 6H); ESI (m/z) 2153,4 [M+H, (100)]<sup>+</sup>

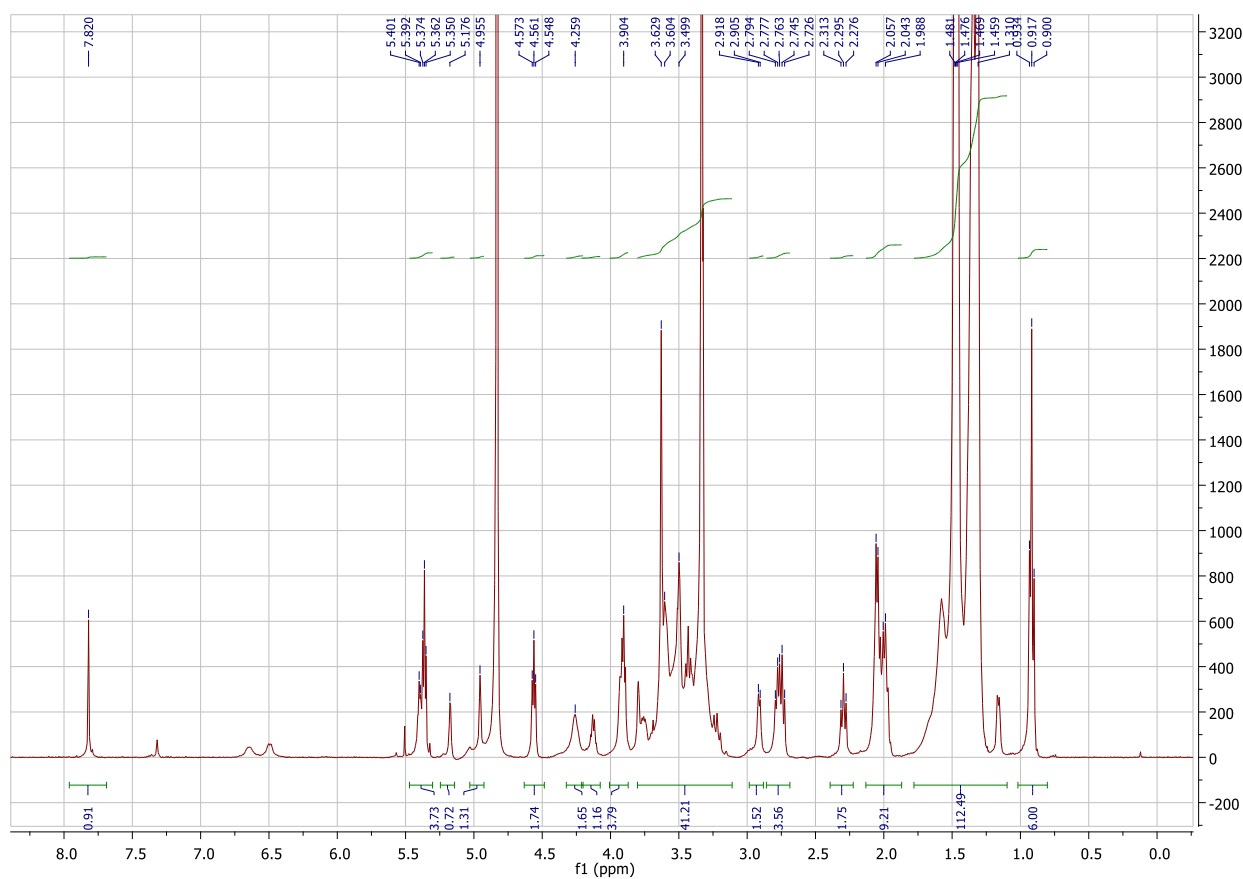

-L.G.S. - Laboratorio Grandi Strumenti - Display Report

|               |                                                 |                  |                        |            |                 |
|---------------|-------------------------------------------------|------------------|------------------------|------------|-----------------|
| Analysis Name | av cpv132.d                                     | Acquisition Date | 01/11/18 09:02:31      | Operator   | Walter Panzeri  |
| Sample Name   |                                                 | Method           | Copy of _01tmix_posneg | Instrument | esquire3000plus |
| Comment       | 1 mg/ml dil 1:100 MeOH<br>Richiedente: Pennetta |                  | hm.MS                  |            |                 |

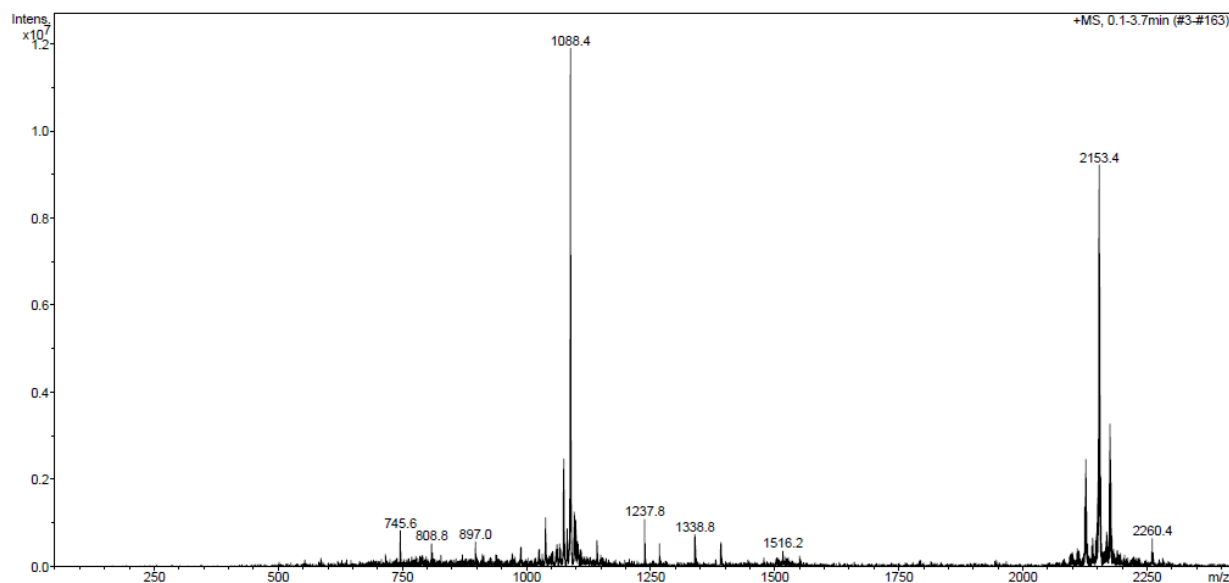

Bruker Daltonics DataAnalysis 3.1

printed: 01/11/18 09:06:51

Page 1 of 1

**Compound 9bb:** white solid, 20% yield in two steps. <sup>1</sup>H NMR (400 MHz, CD<sub>3</sub>OD) δ 7.79 (s, 1H), 6.07 (d, *J* = 4.2 Hz, 1H), 5.42 (d, *J* = 3.6 Hz, 1H), 5.34 (m, 4H), 5.09 (q, *J* = 6.4Hz, 1H), 4.54 (b, 2H), 4.38 (m, 2H), 4.16 (m, 1H), 3.89-3.87 (m, 4H), 3.67-3.34 (m, 29H), 2.73 (m, 5H), 2.47 (m, 1H), 2.28 (t, *J* = 7.6Hz, 2H), 2.15-1.92 (m, 8H), 1.68 (m, 4H), 1.61 (m, 4H), 1.32 (m, 44H), 0.90 (t, *J* = 6.4Hz, 6H). <sup>13</sup>C NMR (101 MHz, CD<sub>3</sub>OD) δ 175.8, 163.3, 162.9, 148.3, 130.8, 130.6, 124.1, 112.0, 96.9, 96.4, 87.5, 81.9, 81.3, 79.7, 76.4, 75.3, 74.2, 73.3, 72.2, 71.3, 70.3, 70.1, 69.4, 69.2, 55.5, 52.9, 51.3, 50.2, 41.7, 39.6, 36.3, 35.7, 34.7, 33.1, 32.9, 32.1, 30.7, 30.4, 30.3, 27.9, 26.8, 26.1, 25.7, 23.7, 14.4; Anal. calcd. for C<sub>76</sub>H<sub>142</sub>N<sub>16</sub>O<sub>15</sub>S: C 58.81, H 9.22, N 14.44; found: C 58.80, H 9.24, N 14.45.

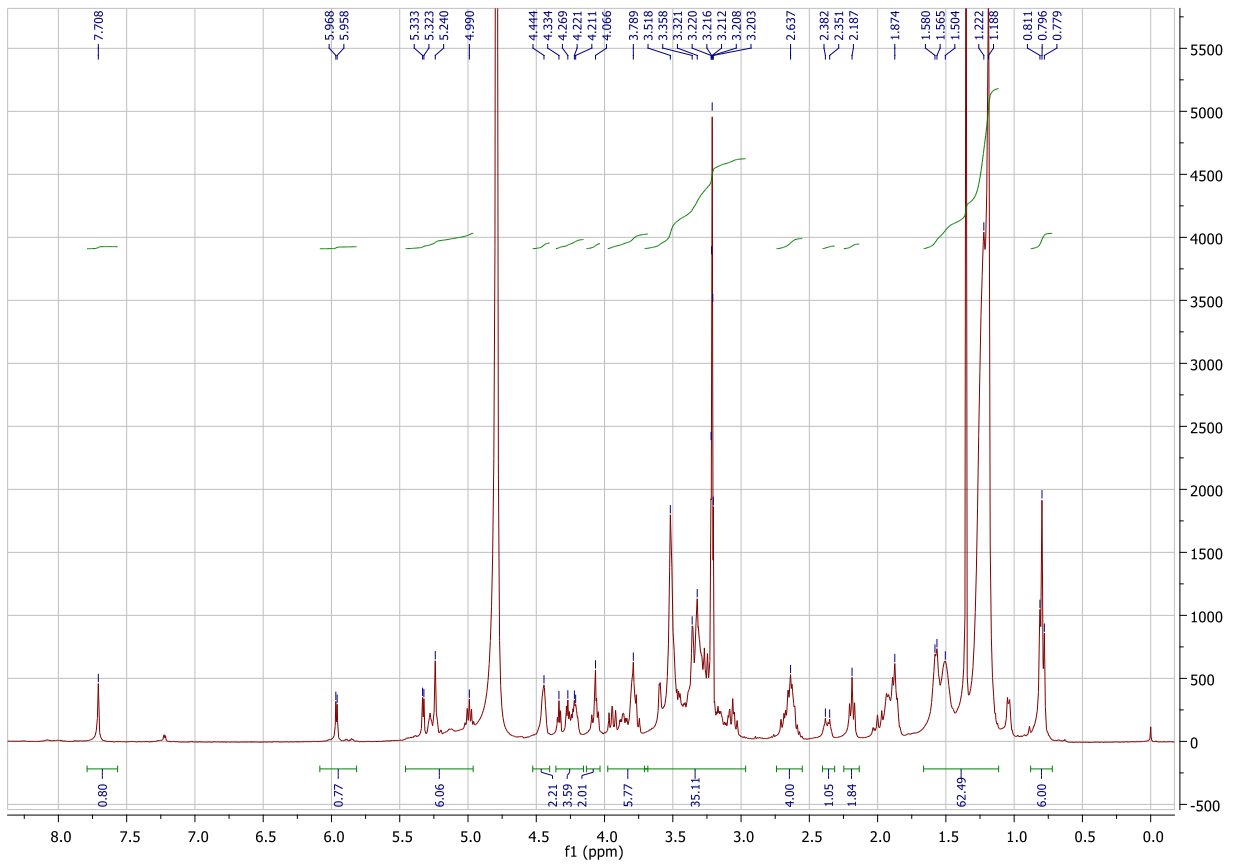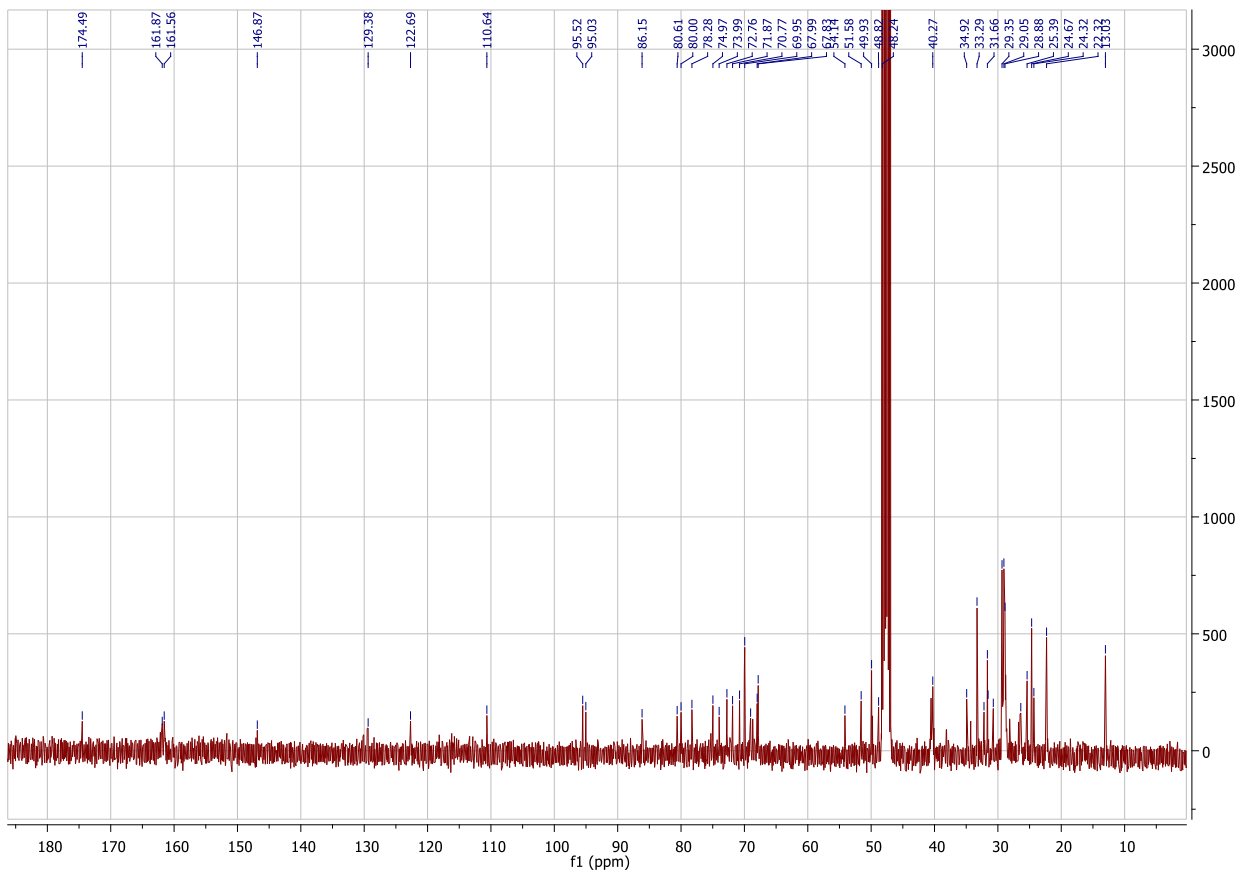

**Figure S16.**  $^1\text{H}$  NMR and  $^{13}\text{C}$  NMR spectra of derivative 2\_Chol (compound 9cc)

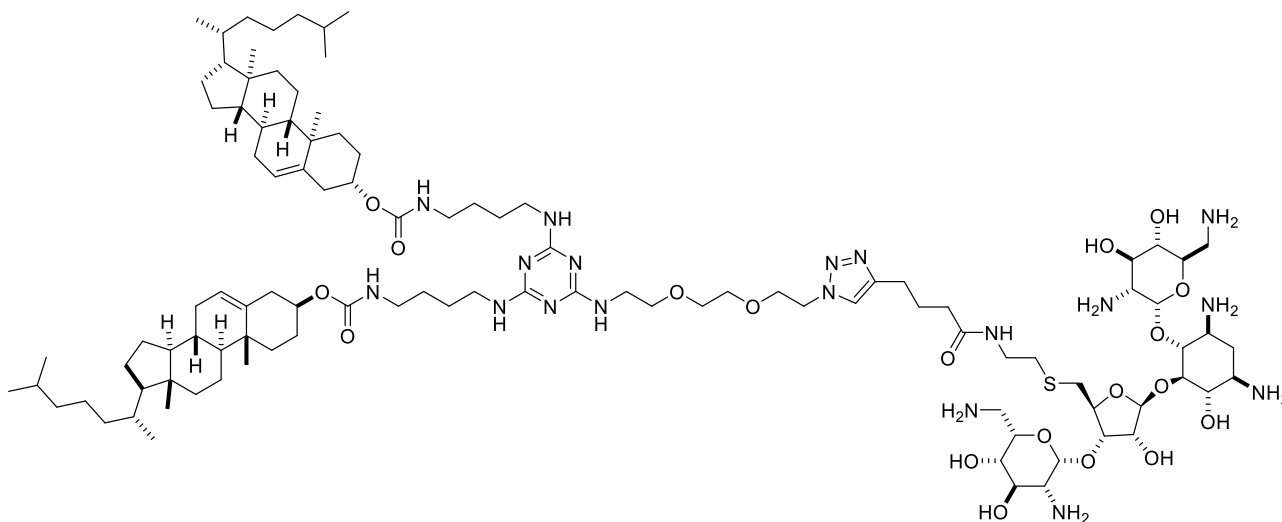

**Compound 9cc:** yellowish solid, 55% yield in two steps.  $^1\text{H}$  NMR (500 MHz,  $\text{CD}_3\text{OD}$ )  $\delta$  7.80 (s, 1H), 6.09 (d,  $J = 3.5$  Hz, 1H), 5.42 (d,  $J = 3.5$  Hz, 1H), 5.38-5.36 (m, 2H), 5.34 (s, 1H), 4.55-4.53 (m, 2H), 4.44 (t,  $J = 4.5$  Hz, 1H), 4.38-4.34 (m, 5H), 3.90-3.87 (m, 4H), 3.69 (s, 1H), 3.62-3.35 (m, 36H), 3.15-3.10 (m, 5H), 2.75-2.70 (m, 5H), 2.32-2.29 (m, 5H), 1.88-1.85 (m, 4H), 1.61-0.91 (m, 75H), 0.72 (br s, 6H).  $^{13}\text{C}$  NMR (126 MHz,  $\text{CD}_3\text{OD}$ )  $\delta$  175.9, 161.6, 158.5, 141.3, 132.2, 129.2, 123.5, 112.1, 96.9, 96.4, 87.5, 82.0, 79.7, 76.3, 75.4, 74.2, 73.3, 72.2, 71.4, 71.3, 70.4, 69.4, 69.3, 61.5, 58.2, 55.6, 53.0, 51.4, 51.2, 50.3, 43.6, 41.9, 41.7, 41.2, 40.7, 39.7, 37.8, 36.4, 33.3, 33.0, 32.2, 29.3, 26.8, 25.7, 22.2; Anal. calcd. for  $\text{C}_{104}\text{H}_{180}\text{N}_{18}\text{O}_{19}\text{S}$ : C 61.88, H 8.99, N 12.49; found: C 61.90, H 9.00, N 12.50.

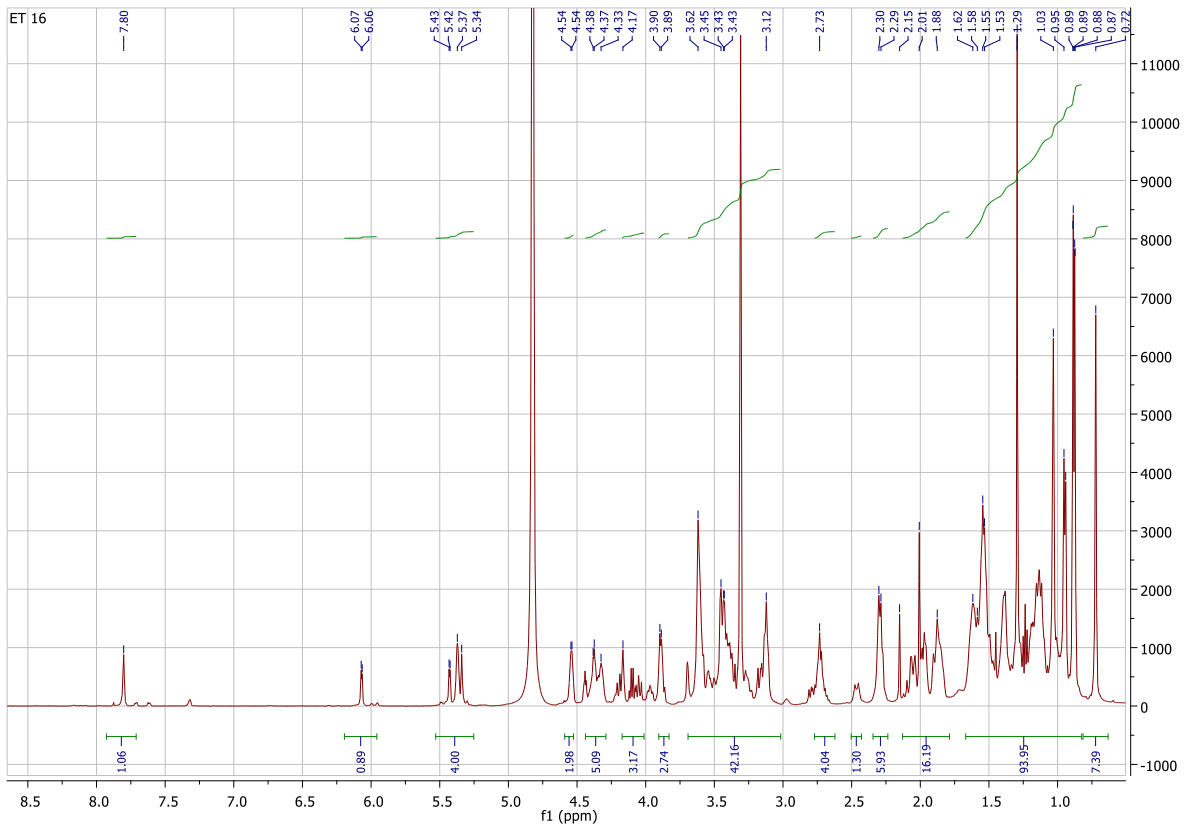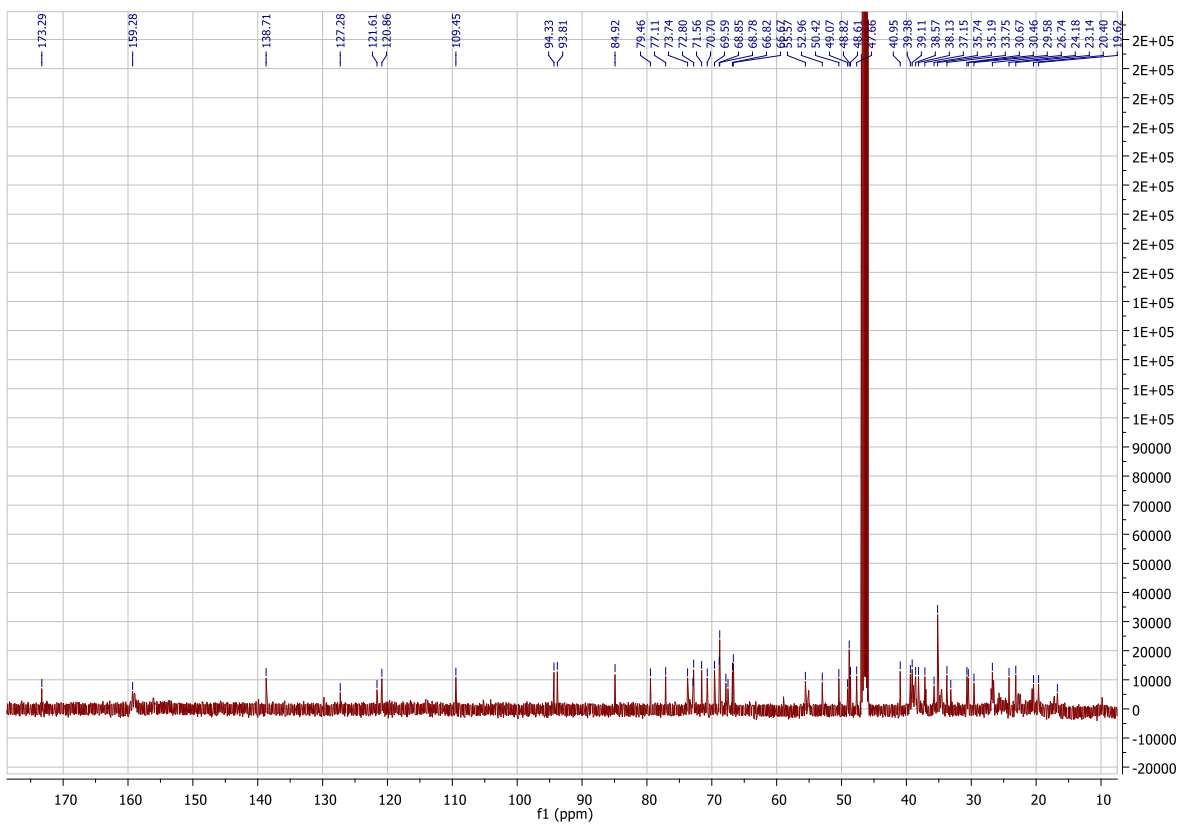

**Figure S17.**  $^1\text{H}$  NMR and mass spectra of compound Boc-9ab and  $^1\text{H}$  NMR and  $^{13}\text{C}$  NMR spectra of derivative 1\_ST-1\_OL (compound 9ab)

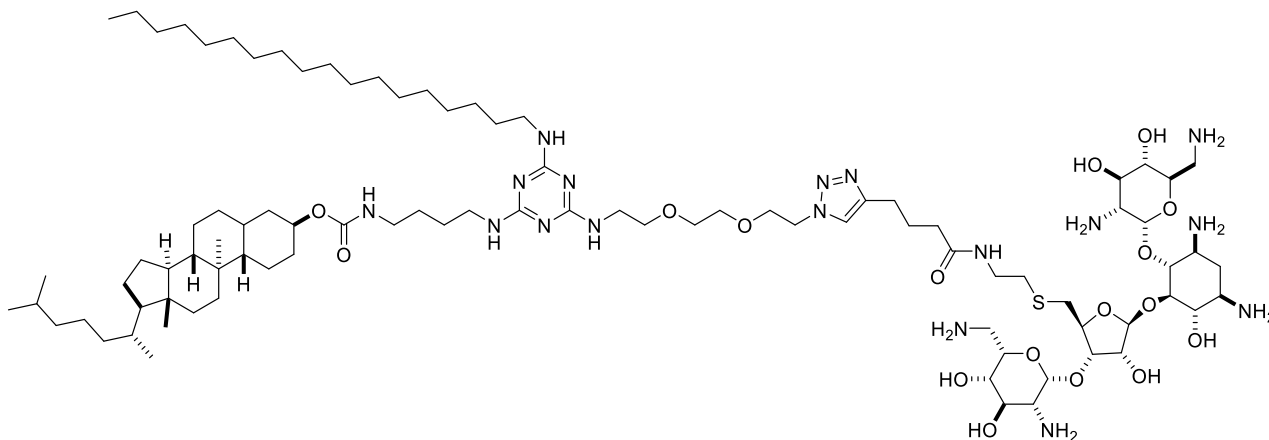

**Compound Boc-9ab:**  $R_f = 0.33$  (DCM/MeOH = 90:10);  $^1\text{H}$  NMR (400 MHz,  $\text{CD}_3\text{OD}$ )  $\delta$  7.80 (s, 1H), 5.38 (d, 1H), 5.34 (t, 2H), 5.15 (d,  $J=2.4$  Hz, 1H), 4.93 (s, 1H), 4.54 (t,  $J=4.8$  Hz, 2H), 4.25 (b, 2H), 4.12 (m, 1H), 3.88 (m, 4H), 3.80-3.70 (m, 2H), 3.67-3.35 (m, 27H), 2.89 (m, 2H), 2.72 (m, 4H), 2.27 (t,  $J=7.6$  Hz, 2H), 2.08-1.93 (m, 7H), 1.56 (b, 1H), 1.53-1.41 (m, 54H), 1.33 (m, 56H), 0.90 (t,  $J=6.4$  Hz, 6H). ESI (m/z) 2177,8 [ $\text{M}+\text{Na}$ , (34)] $^+$ , 2155,8 [ $\text{M}+\text{H}$ , (38)] $^+$ , 1089,5 [ $\text{M}+\text{Na}$ , (100)] $^{2+}$

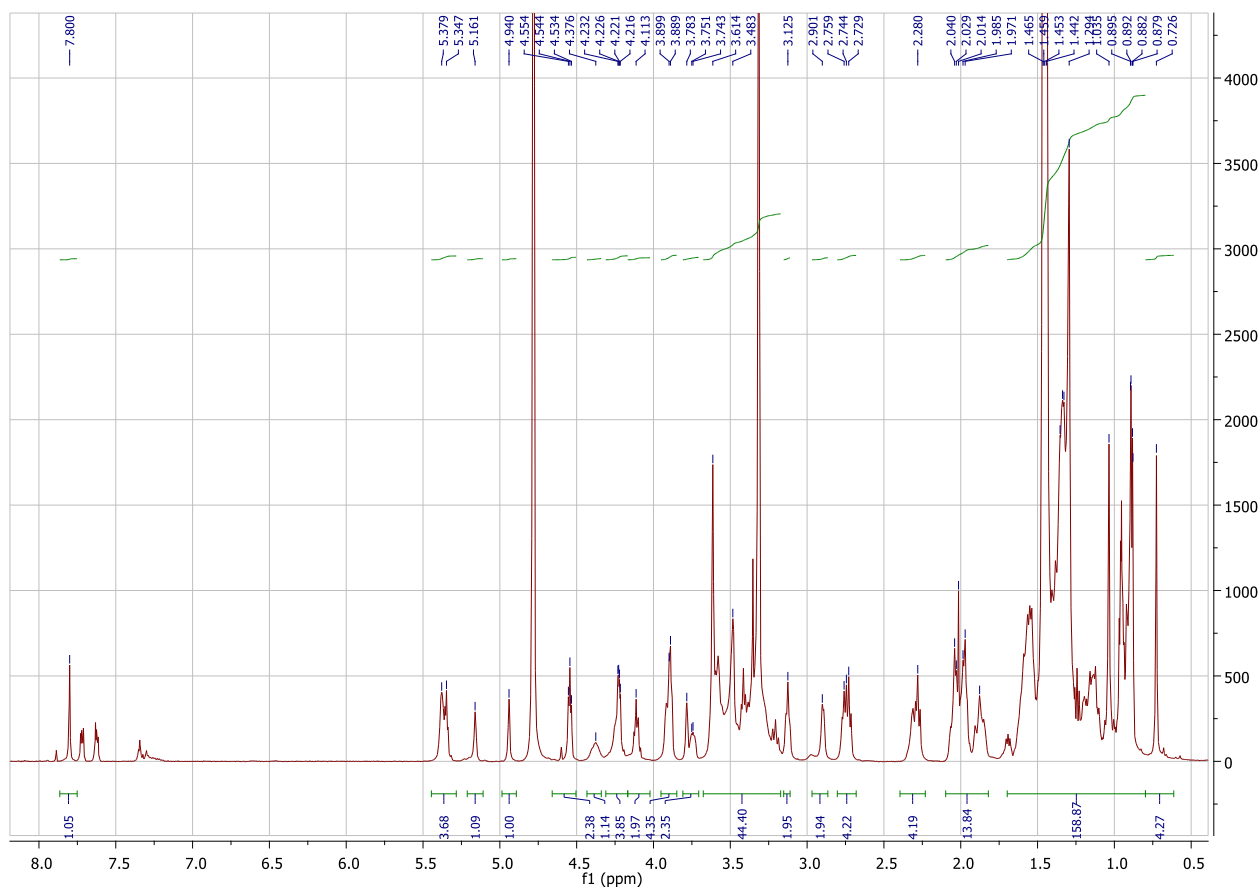

-L.G.S. - Laboratorio Grandi Strumenti - Display Report

|               |                                              |                  |                                 |            |                 |
|---------------|----------------------------------------------|------------------|---------------------------------|------------|-----------------|
| Analysis Name | av et14.d                                    | Acquisition Date | 01/09/19 14:50:09               | Operator   | Walter Panzeri  |
| Sample Name   |                                              | Method           | Copy of _01tmix_posneg<br>hm.MS | Instrument | esquire3000plus |
| Comment       | 1 mg/ml dil 1:100 MeOH<br>Richiedente: Viani |                  |                                 |            |                 |

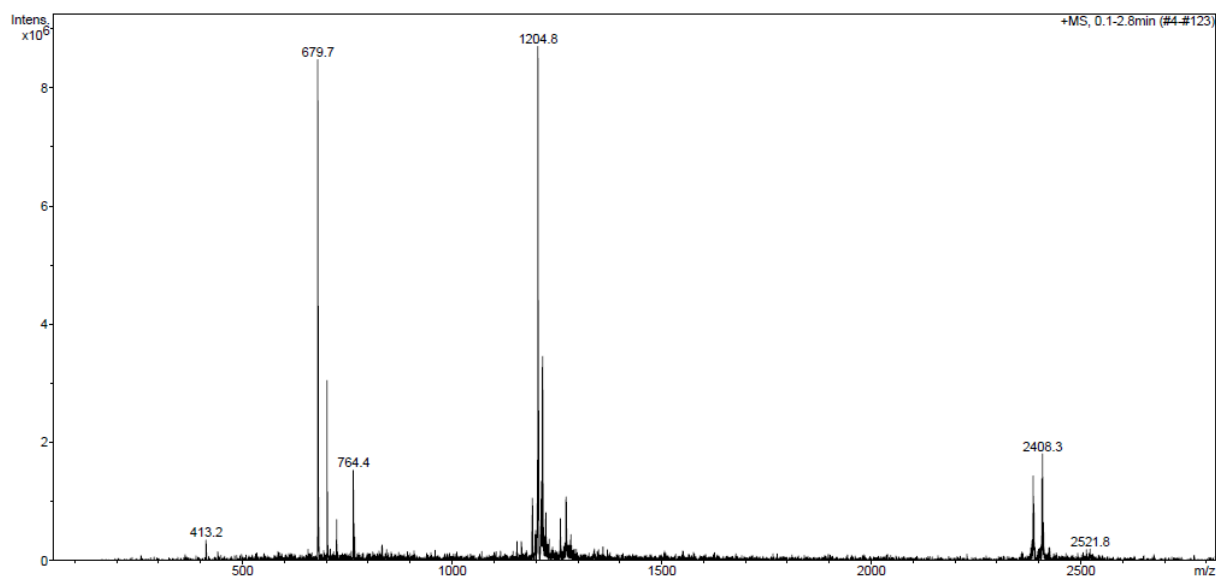

Bruker Daltonics DataAnalysis 3.1

printed: 01/09/19 14:55:34

Page 1 of 1

**Compound 9ab:** white solid, 40% yield in two steps.  $^1\text{H}$  NMR (500 MHz,  $\text{CD}_3\text{OD}$ )  $\delta$  7.81 (s, 1H), 6.07 (d,  $J = 2.8\text{Hz}$ , 1H), 5.42 (d,  $J = 3.2\text{ Hz}$ , 1H), 5.35-5.32 (m, 3H), 4.54-4.51 (m, 2H), 4.33-4.31 (m, 2H), 4.18-4.16 (m, 1H), 3.90-3.86 (m, 4H), 3.68-3.35 (m, 29H), 3.15 (m, 2H), 2.81-2.67 (m, 4H), 2.29 (t,  $J = 4.1\text{ Hz}$ , 2H), 2.13-1.94 (m, 5H), 1.61-1.59 (m, 3H), 1.35-1.29 (m, 56H), 0.90 (t,  $J = 4.4\text{Hz}$ , 6H).  $^{13}\text{C}$  NMR (126 MHz,  $\text{CD}_3\text{OD}$ )  $\delta$  159.3, 128.4, 128.2, 109.5, 94.4, 93.9, 79.5, 77.2, 72.8, 71.6, 70.7, 69.6, 68.9, 68.8, 67.9, 66.7, 52.9, 50.4, 48.8, 48.6, 47.7, 46.9, 39.4, 39.1, 30.5, 28.2, 27.9, 25.6, 24.2, 23.2, 21.1, 11.8; Anal. calcd. for  $\text{C}_{76}\text{H}_{144}\text{N}_{16}\text{O}_{15}\text{S}$ : C 58.74, H 9.34, N 14.42; found: C 58.76, H 9.33, N 14.41.

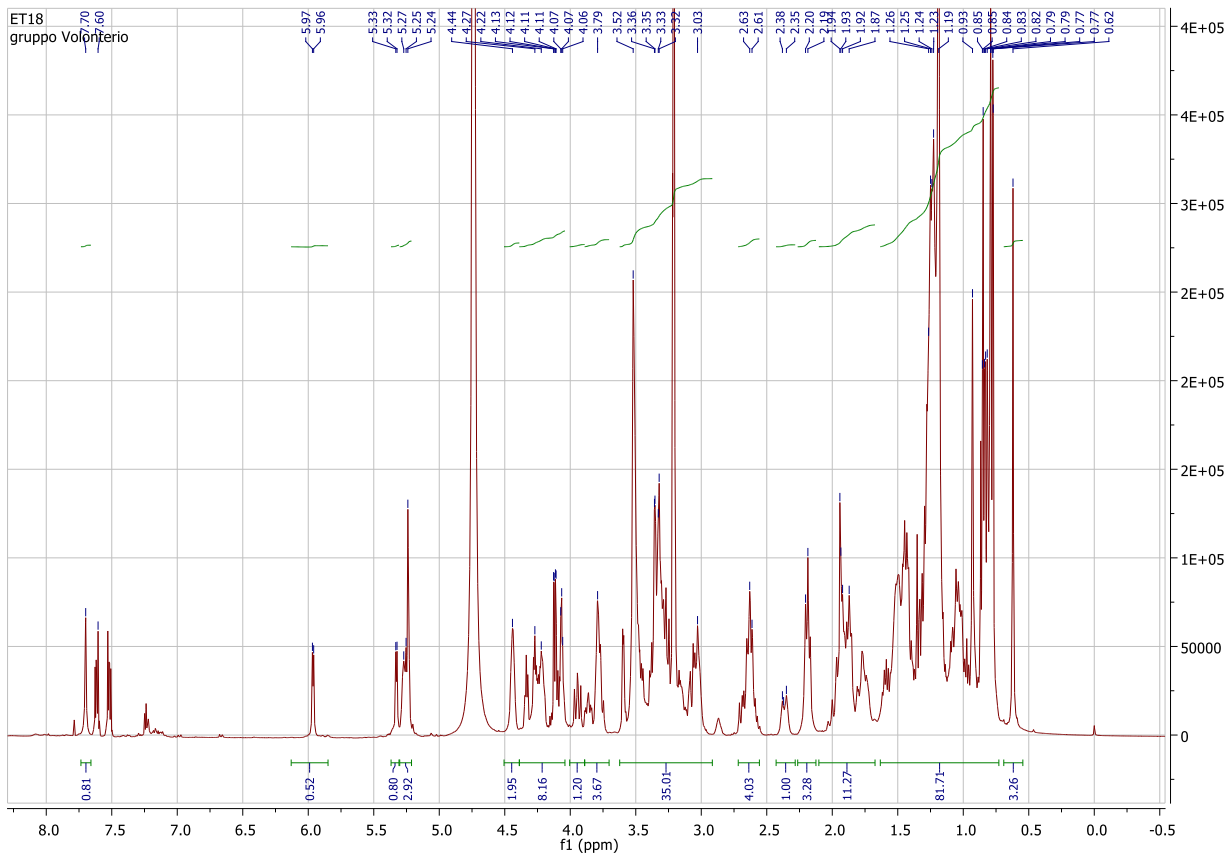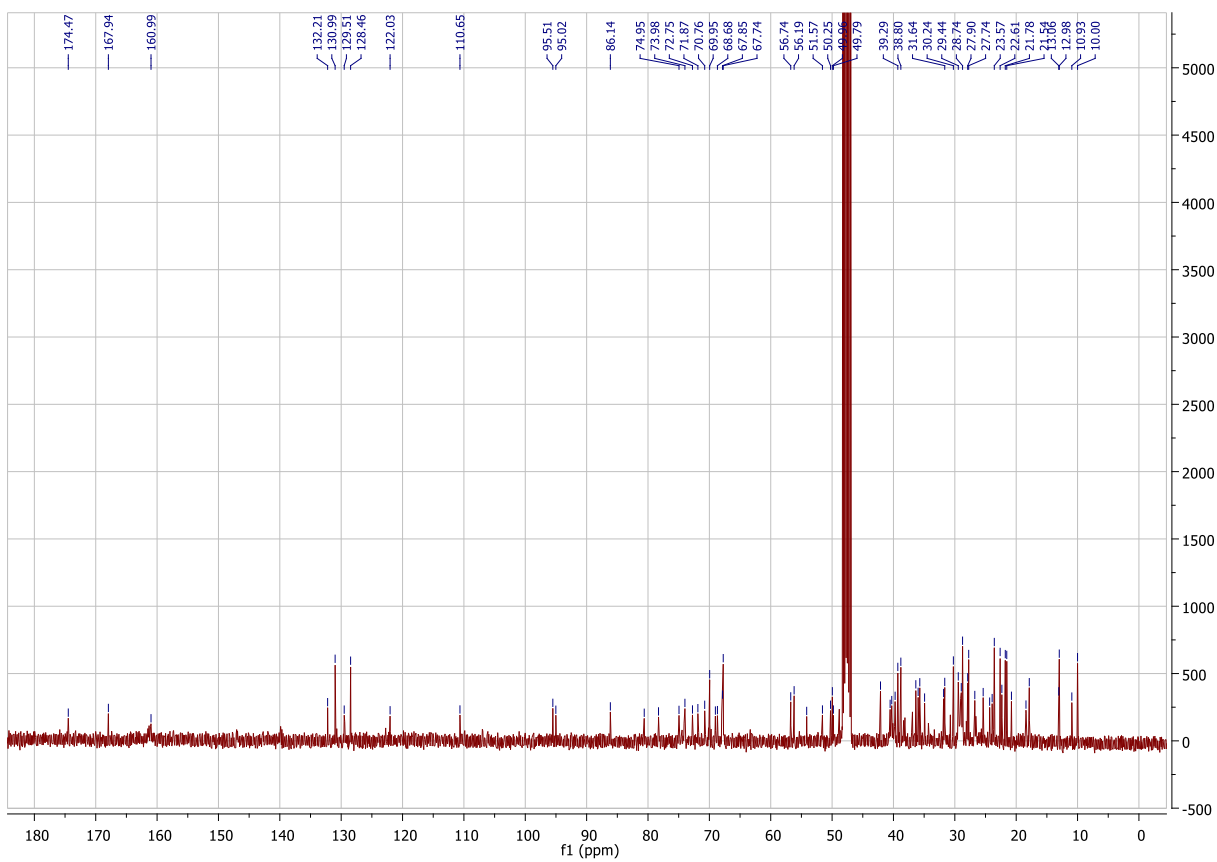



**Figure S18. Mass spectra of compound Boc-9bc and <sup>1</sup>H NMR and <sup>13</sup>C NMR spectra of derivative 1\_OL-1\_Chol (compound 9bc)**

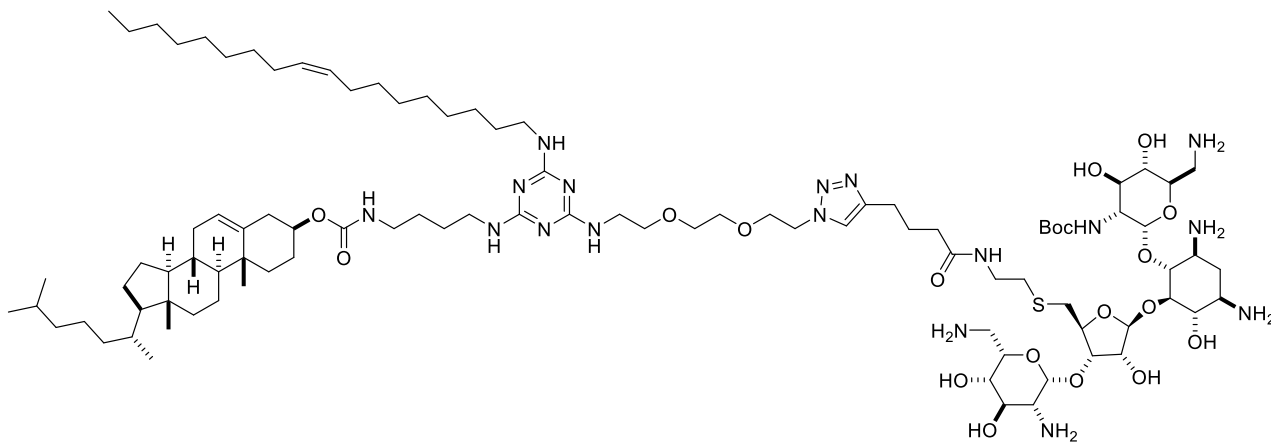

**Compound Boc-9bc:**  $R_f = 0.30$  (DCM/MeOH = 90:10); ESI ( $m/z$ ) 2410.3 [ $M+Na$ , (100)]<sup>+</sup>, 1216.8 [ $M+Na$ , (100)]<sup>2+</sup>

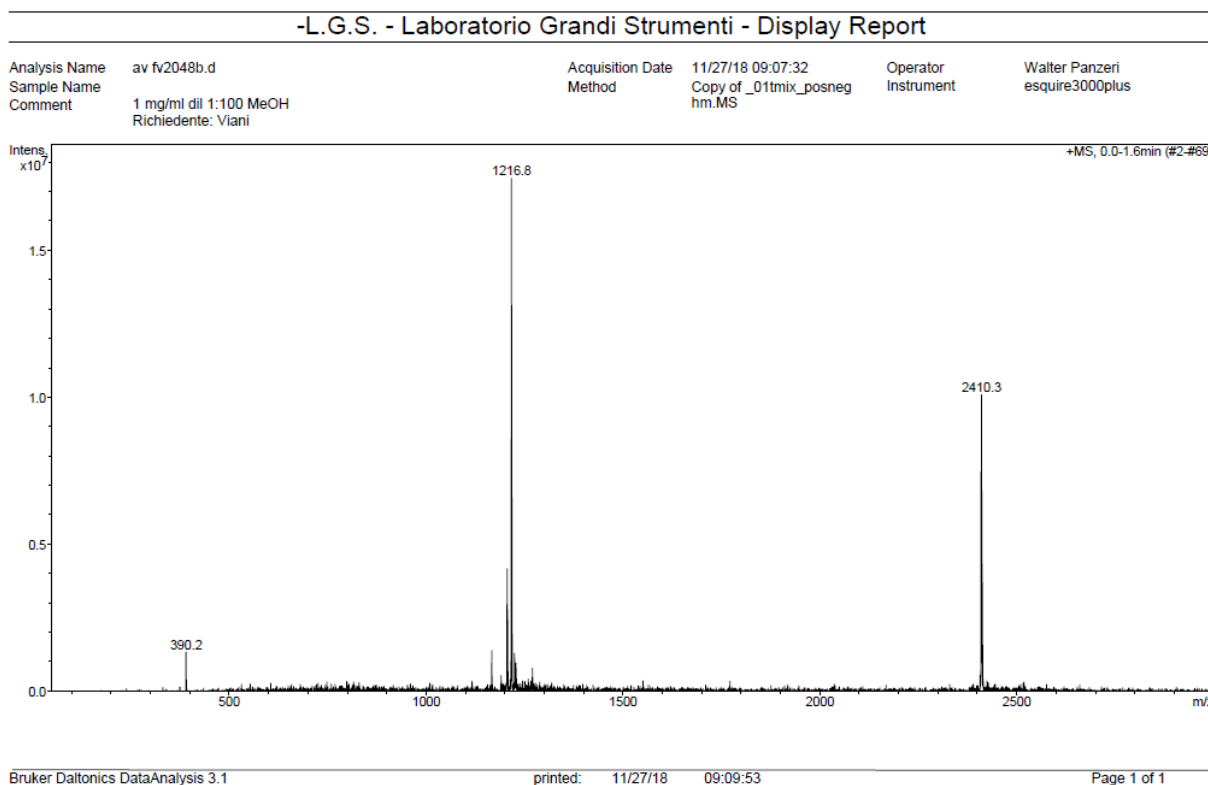

**Compound 9bc:** white solid, 35% yield in two steps.  $^1\text{H}$  NMR (400 MHz,  $\text{CD}_3\text{OD}$ )  $\delta$  7.80 (s, 1H), 6.06 (s, 1H), 5.42 (d,  $J = 3.6$  Hz, 1H), 5.34 (s, 4H), 4.54 (bs, 1H), 4.38-4.36 (m, 2H), 3.89 (s, 2H), 3.73-3.25 (m, 35H), 3.16-3.12 (m, 3H), 2.73 (t,  $J = 4.2$  Hz, 3H), 2.32-2.30 (m, 4H), 2.10-1.87 (m, 6H) 1.69-0.87 (m, 70H), 0.72 (br s, 3H);  $^{13}\text{C}$  NMR (101 MHz,  $\text{CD}_3\text{OD}$ )  $\delta$  169.0, 162.6, 162.1, 124.2, 119.1, 71.4, 71.3, 69.4, 58.1, 57.6, 51.6, 46.1, 43.5, 41.1, 40.7, 38.3, 37.7, 37.4, 37.1, 36.4, 33.2, 33.1, 30.8, 30.5, 29.3, 29.1, 28.8, 24.9, 23.7, 23.2, 22.9, 22.2, 19.3, 14.4, 12.3; Anal. calcd. for  $\text{C}_{90}\text{H}_{161}\text{N}_{17}\text{O}_{17}\text{S}$ : C 60.54, H 9.09, N 13.34; found: C 60.55, H 9.10, N 13.36.

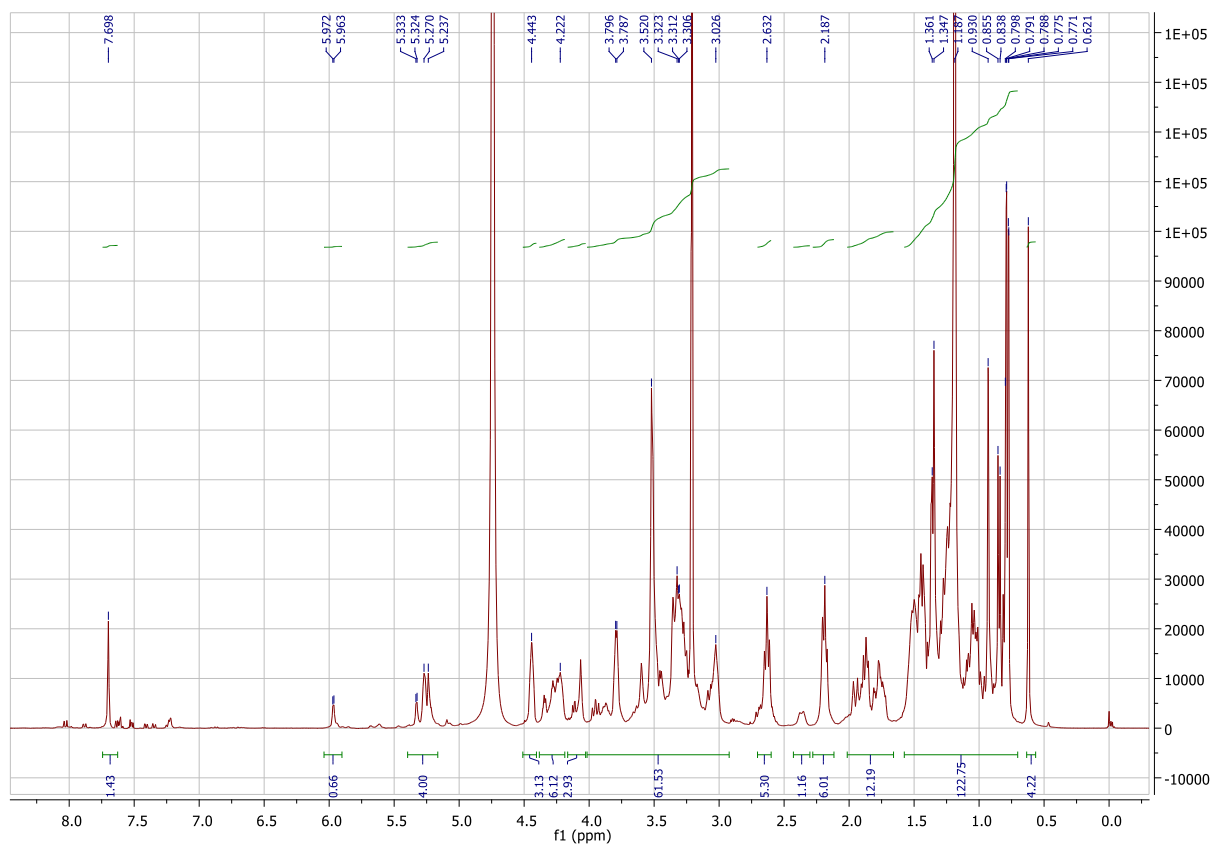

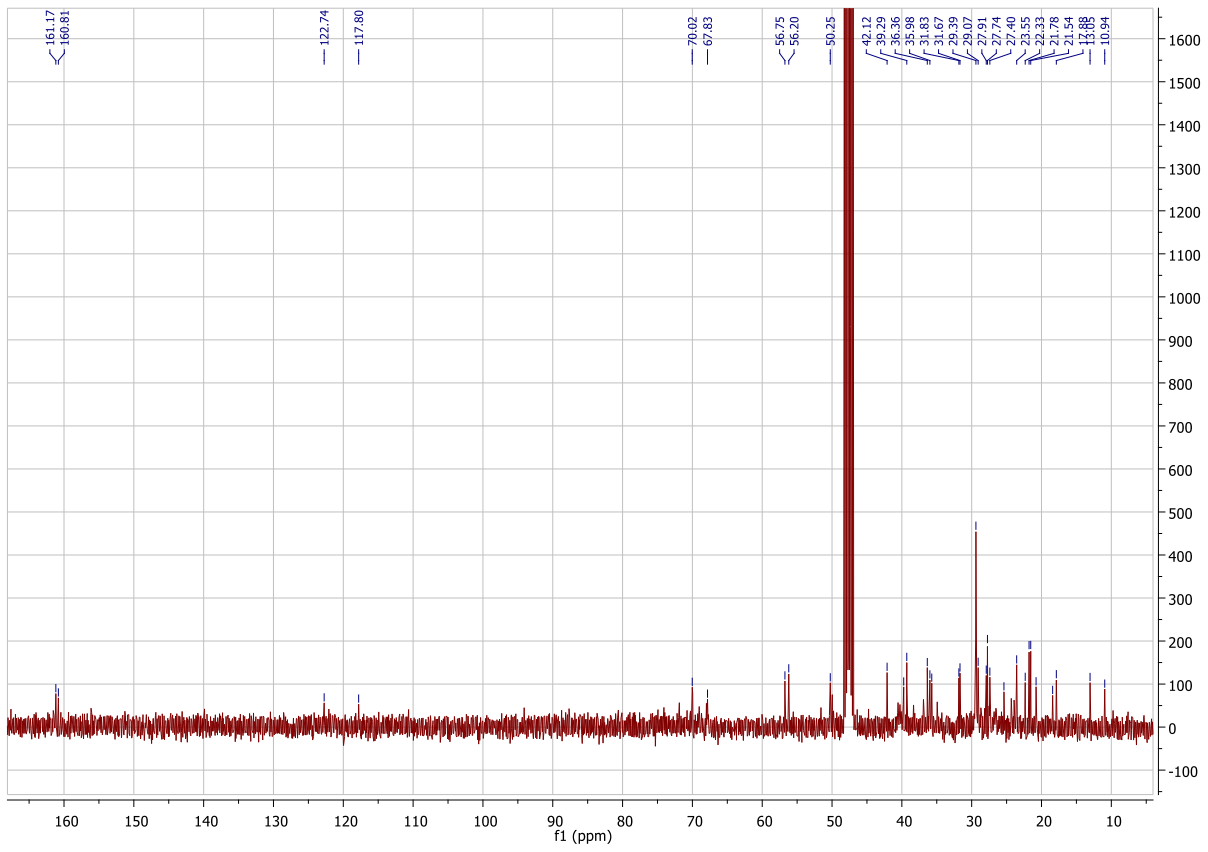

**Figure S19.**  $^1\text{H}$  NMR and mass spectra of Boc-9ac and  $^1\text{H}$  NMR and  $^{13}\text{C}$  NMR spectra of derivative 1\_ST-1\_Chol (compound 9ac)

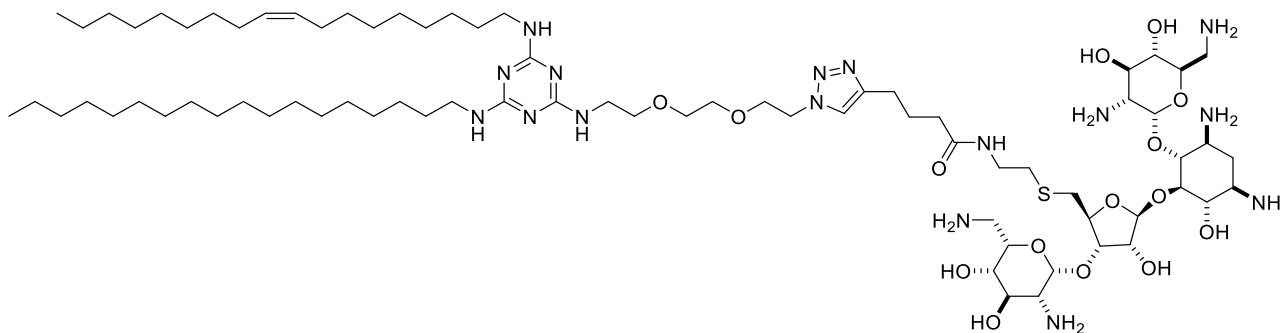

**Compound Boc-9ac:**  $R_f = 0.21$  (DCM/MeOH = 90:10);  $^1\text{H}$  NMR (500 MHz,  $\text{CD}_3\text{OD}$ )  $\delta$  7.80 (s, 1H), 5.37-5.32 (m, 2H), 5.16 (s, 1H), 4.94 (s, 1H), 4.54 (t, 2H), 4.36 (b, 1H), 4.21 (m, 3H), 4.11 (m, 2H), 3.89 (m, 3H), 3.75 (m, 2H), 3.61-3.35 (m, 30H), 3.13 (t, 2H), 2.90 (b, 1H), 2.76 (m, 4H), 2.29 (m, 3H), 2.05-1.95 (m, 5H), 1.86 (m, 2H), 1.60-0.94 (m, 125H), 0.72 (s, 3H). ESI (m/z) 2408.3  $[\text{M}+\text{Na}, (22)]^+$ , 1204.8  $[\text{M}+\text{Na}, (100)]^{2+}$

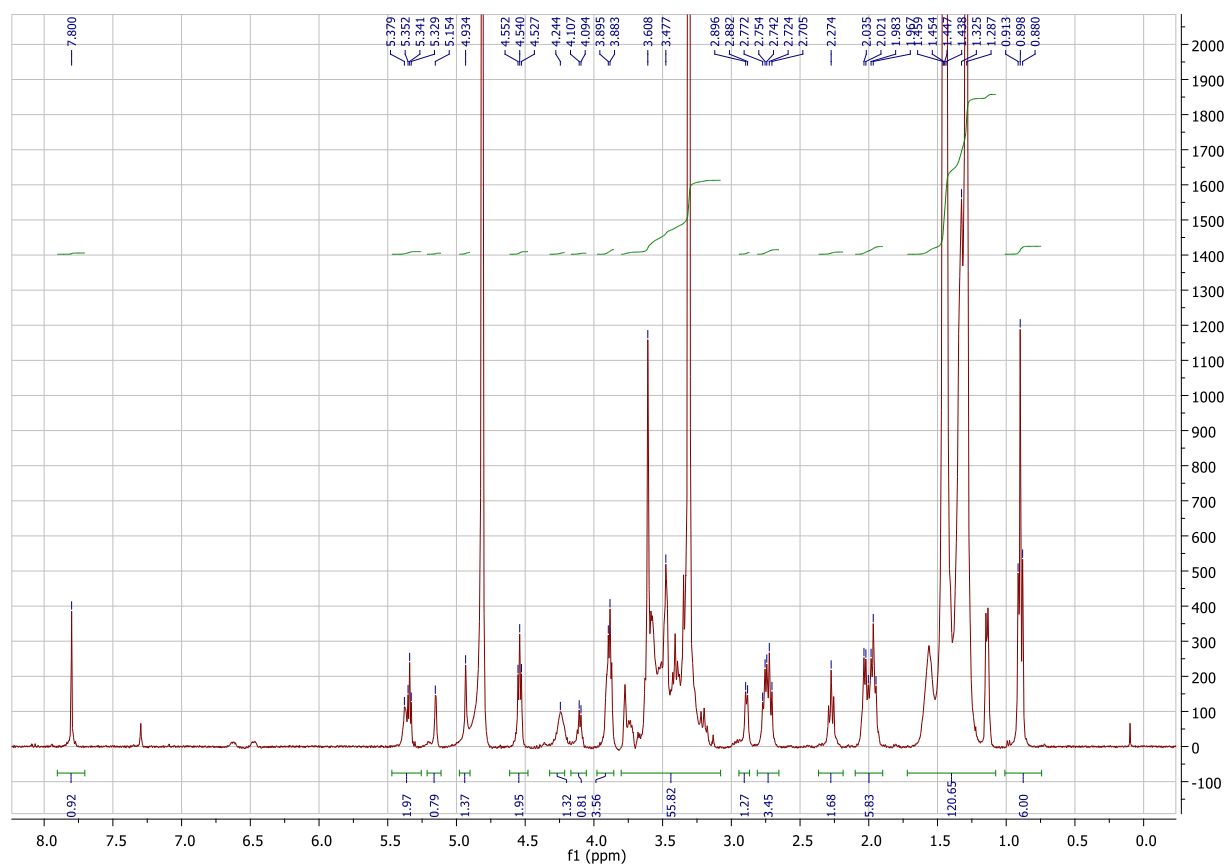

-L.G.S. - Laboratorio Grandi Strumenti - Display Report

|               |                        |                  |                        |            |                 |
|---------------|------------------------|------------------|------------------------|------------|-----------------|
| Analysis Name | av cpv133b.d           | Acquisition Date | 01/25/18 09:30:49      | Operator   | Walter Panzeri  |
| Sample Name   | 1 mg/ml dil 1:100 MeOH | Method           | Copy of _01tmix_posneg | Instrument | esquire3000plus |
| Comment       | Richiedente: Pennetta  |                  | hm.MS                  |            |                 |

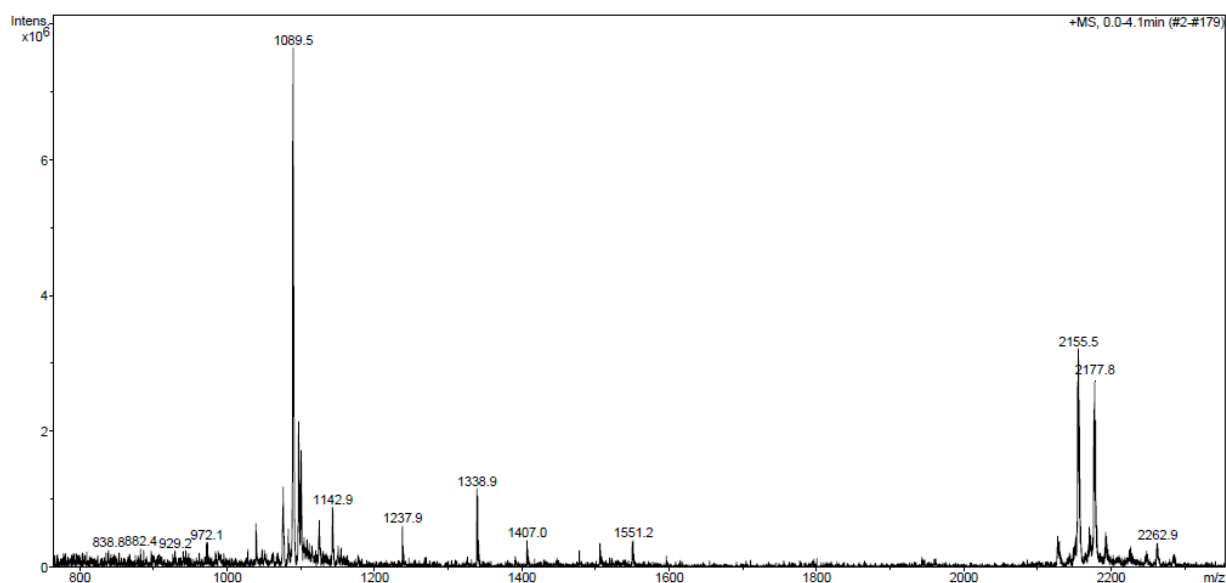

Bruker Daltonics DataAnalysis 3.1

printed: 01/25/18 09:52:51

Page 1 of 1

**Compound 9ac:** white solid, 44% yield in two steps. <sup>1</sup>H NMR (400 MHz, CD<sub>3</sub>OD) δ 7.80 (s, 1H), 6.06 (d, *J* = 3.5 Hz, 1H), 5.43 (s, 1H), 5.36-5.34 (m, 2H), 4.55-4.53 (m, 2H), 4.42 (s, 1H), 3.89-3.52 (m, 31H), 3.14-3.12 (m, 1H), 2.97-2.81 (m, 4H), 2.66-2.64 (m, 2H), 2.46-2.44 (m, 2H), 2.30-2.28 (m, 2H), 1.61-0.89 (m, 81H), 0.72 (br s, 3H). <sup>13</sup>C NMR (101 MHz, CD<sub>3</sub>OD) δ 169.3, 133.6, 132.4, 130.9, 129.9, 123.4, 112.0, 96.9, 96.4, 87.5, 76.3, 75.4, 74.1, 73.3, 72.1, 71.3, 70.4, 70.1, 69.2, 69.1, 58.1, 57.6, 55.5, 52.9, 51.6, 51.3, 51.2, 50.2, 43.5, 41.9, 41.7, 41.1, 40.7, 40.2, 38.3, 37.7, 37.4, 37.1, 36.3, 33.2, 33.0, 32.1, 31.6, 30.8, 30.3, 30.1, 29.3, 29.1, 28.1, 26.8, 25.7, 25.3, 24.9, 24.0, 23.7, 23.2, 22.9, 22.2, 19.8, 19.3, 14.4, 14.3, 12.3, 11.4; Anal. calcd. for C<sub>90</sub>H<sub>163</sub>N<sub>17</sub>O<sub>17</sub>S: C 60.48, H 9.19, N 13.32; found: C 60.50, H 9.17, N 13.31.

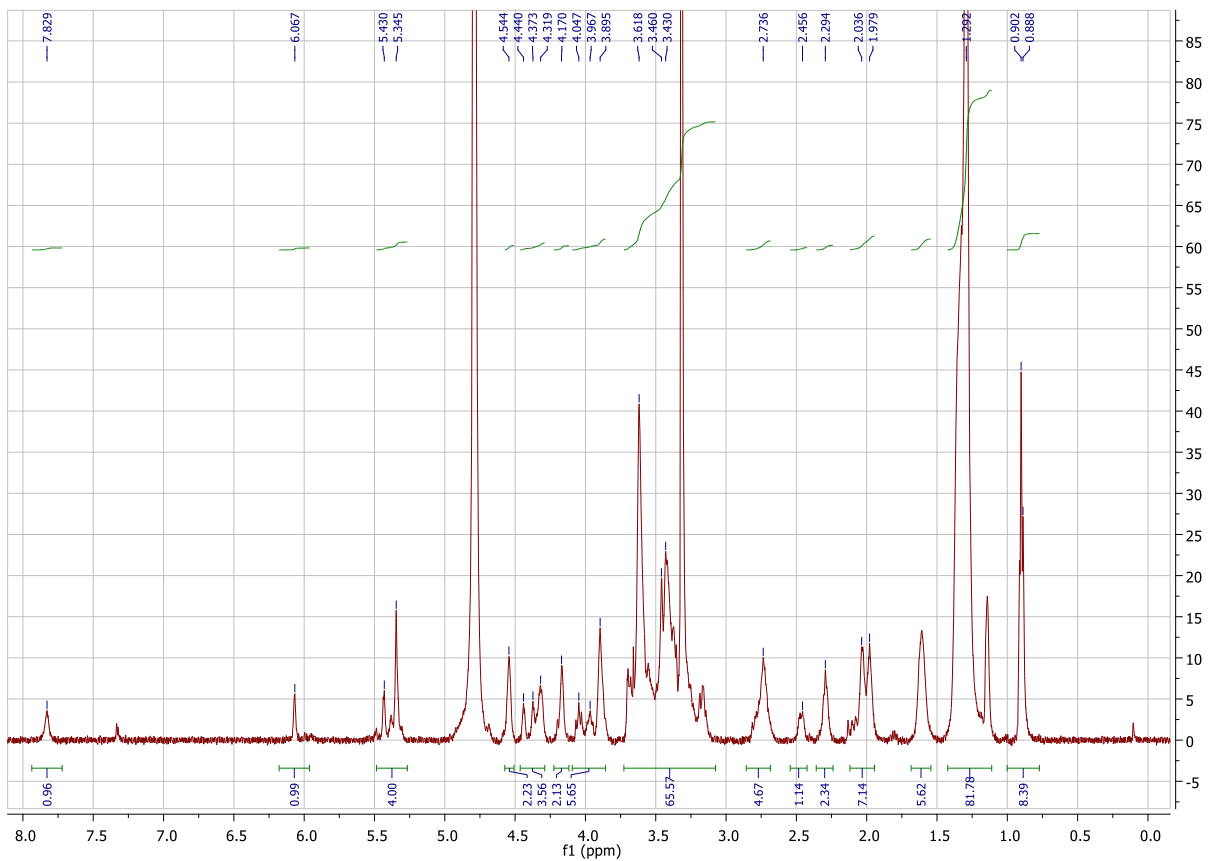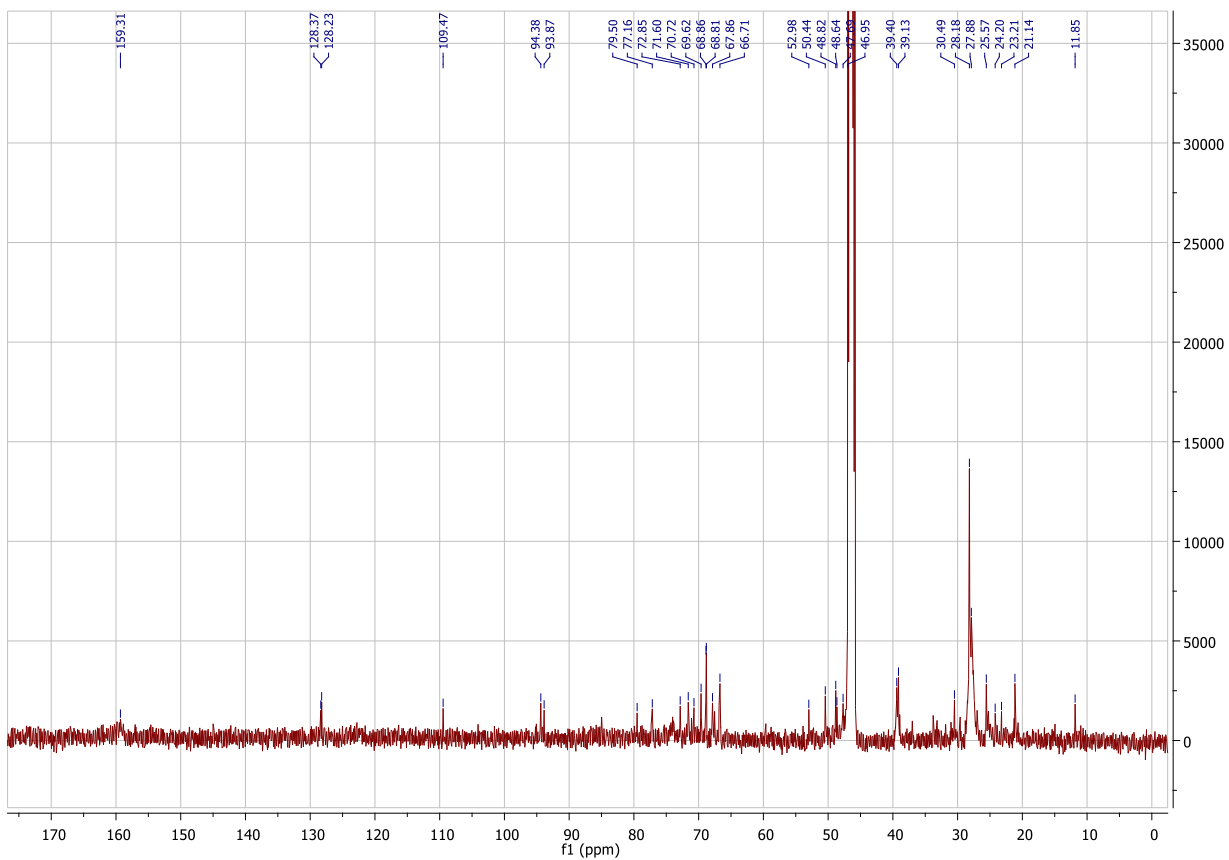

Figure S20.  $^{19}\text{F}$  spectra of derivative 1\_OL (compound 8b)

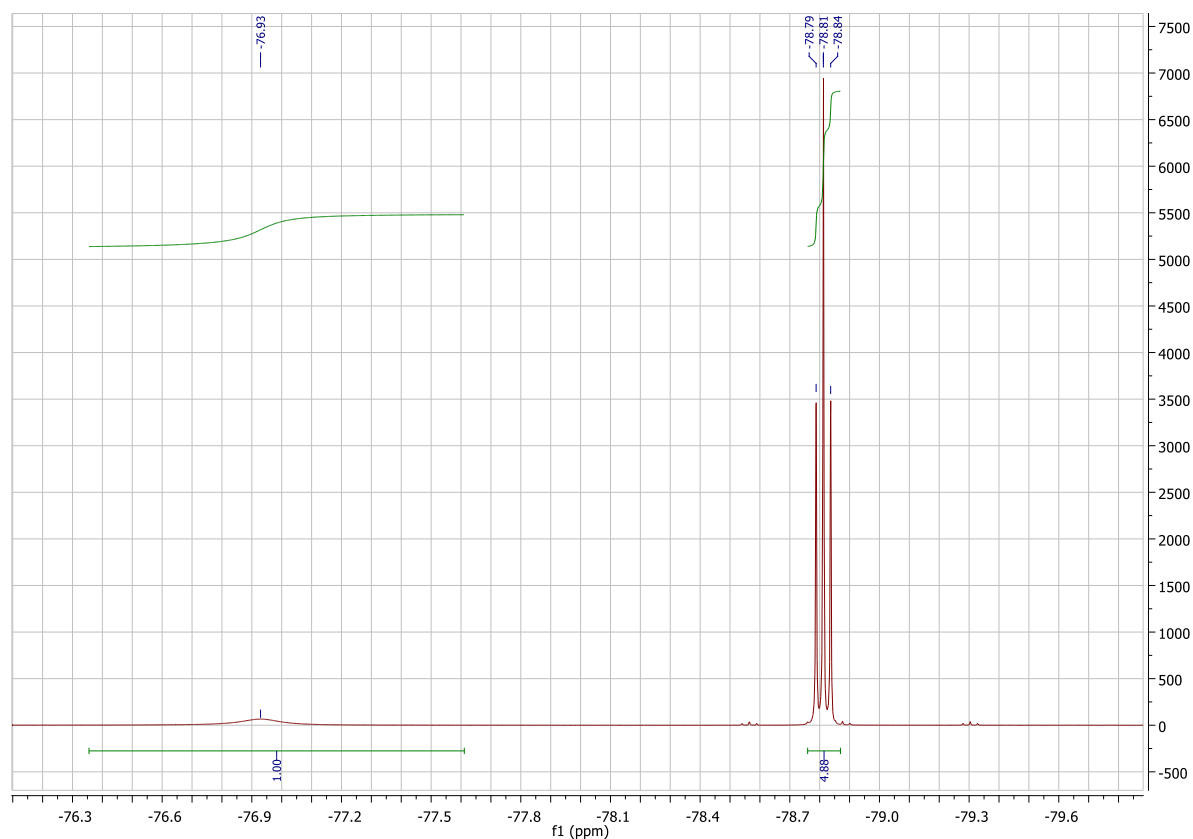

To a solution of 8.1 mg of triazine **8b** ( $\text{MW} = 1319.74 + x\text{TFA}$ ) in 750  $\mu\text{L}$  of  $\text{CD}_3\text{OD}$  trifluoroethanol (10  $\mu\text{L}$ , 0.133 mmol) was added. The  $^{19}\text{F}$  NMR was recorded showing a 4.88:1 molar ratio between the trifluoromethyl group of trifluoroethanol and the trifluoromethyl groups of the trifluoroacetic acid molecules belonging to the triazine **8b**. Thus in 8.1 mg of triazine there are  $0.133 \text{ mmol} / 4.88 = 0.027 \text{ mmol}$  of trifluoroacetic acid which weight 3.1 mg.  $8.1 \text{ mg} - 3.1 \text{ mg} = 5.0 \text{ mg}$  of desalted triazine which account for 0.0038 mmol. The molar ratio between triazine and TFA is  $0.027/0.0038 = 7.1$

**Figure S21.**  $^{19}\text{F}$  titration spectra of derivative 2\_OL (compound 9bb)

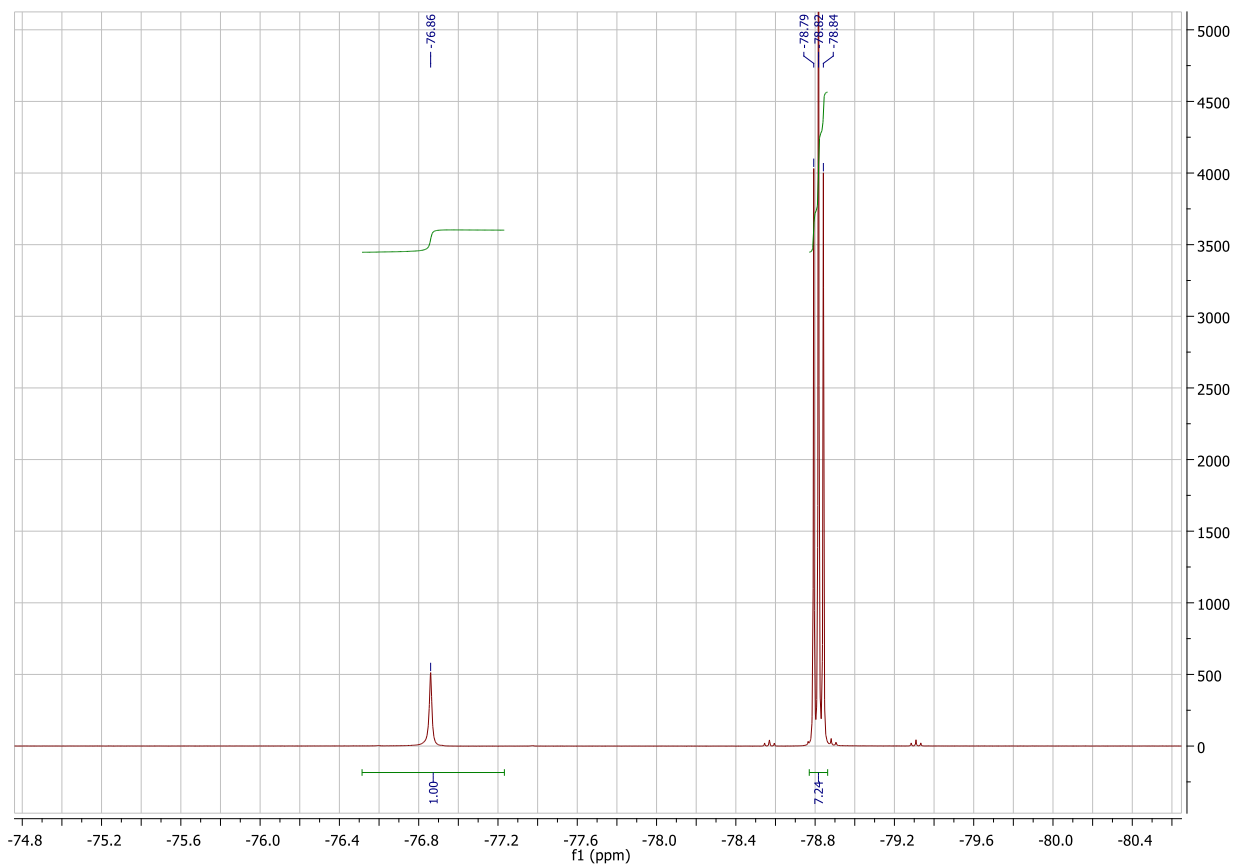

To a solution of 6.8 mg of triazine **9bb** (MW = 1551.06 + xTFA) in 750  $\mu\text{L}$  of  $\text{CD}_3\text{OD}$  trifluoroethanol (10  $\mu\text{L}$ , 0.133 mmol) was added.  $^{19}\text{F}$  NMR was recorded showing a 7.24:1 molar ratio between the trifluoromethyl group of trifluoroethanol and the trifluoromethyl groups of the trifluoroacetic acid molecules belonging to the triazine **9bb**. Thus in 6.8 mg of triazine there are  $0.133 \text{ mmol} / 7.24 = 0.018 \text{ mmol}$  of trifluoroacetic acid which weight 2.09 mg.  $6.8 \text{ mg} - 2.9 \text{ mg} = 3.9 \text{ mg}$  of desalted triazine which account for 0.0025 mmol. The molar ratio between triazine and TFA is  $0.018/0.0025 = 7.2$



**Figure S22. Cytotoxicity and transfection efficiency of Neo-triazazine derivatives evaluated on HeLa cells.**

Complexes were prepared by mixing pGL3 with Neo-triazazine derivatives at different charge ratios (CRs, +/-), 25 kDa *b*PEI (C/R 10) and Lipofectamine 2000 (Lipo). Transfection efficiency is expressed as luminescence signal (RLU) normalized to the total protein content in each cell lysate. A) mono-tailed Neo-triazazine conjugates **1\_ST**, **1\_OL** and **1\_Chol**; B) symmetric two-tailed Neo-triazazine conjugates **2\_ST**, **2\_OL** and **2\_Chol**; C) asymmetric two-tailed Neo-triazazine conjugates **1\_ST-1\_OL**, **1\_ST-1\_Chol** and **1\_OL-1\_Chol**. Results are expressed as mean  $\pm$  SD ( $n \geq 3$ ) (\* $p < 0.05$  vs. other lipids for any given CR).

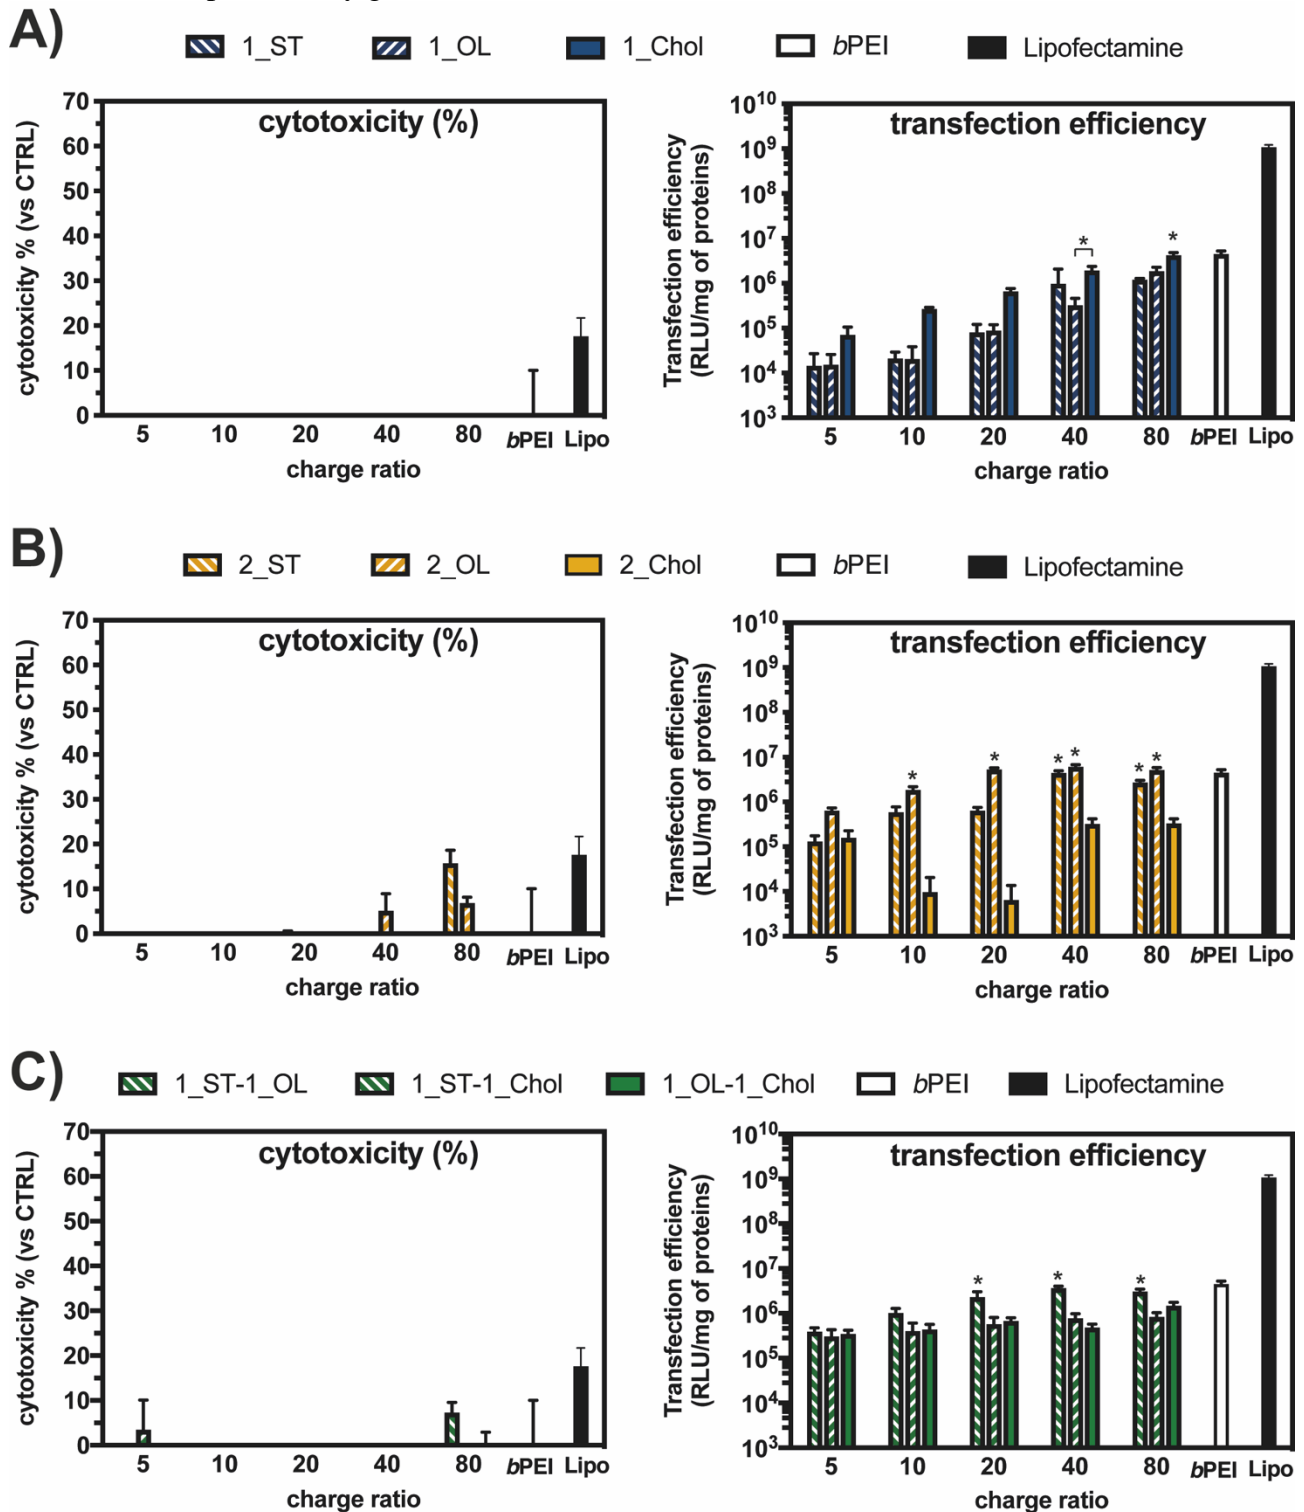

**Figure S23. MIC of Neomycin.**

Evaluation of the MIC of Neo against *E. coli*. Results are expressed as mean  $\pm$  SD ( $n \geq 3$ )

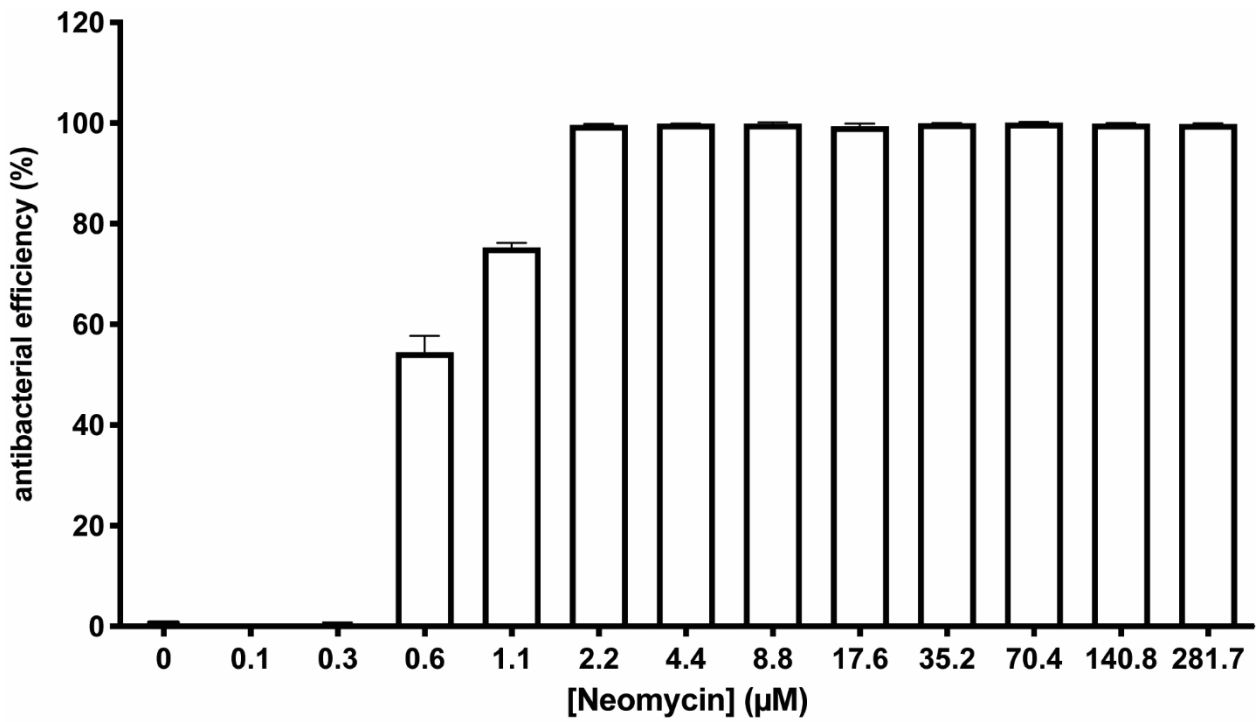

Supplement: bc0c00616_si_001.pdf [file bc0c00616_si_001.pdf]
